# Supplementary material for: A comparative computational study on the synthesis prescriptions, structures and acid properties of B-, Al- and G-incorporated MTW-type zeolites
Source: Royal Society of Chemistry journal article supplement (doi:10.1039/c4ra06114d), 2014-01-01
Supplement: c4ra06114d1.pdf [file c4ra06114d1.pdf]

**A comparative computational study on the synthesis  
prescriptions, structures and acid properties of B, Al and Ga  
incorporated MTW-type zeolites**

**Authors:**

Gang Feng<sup>a</sup>, Deqin Yang<sup>a</sup>, Dejin Kong<sup>a,\*</sup>, Jianwen Liu<sup>b,\*</sup>, Zhang-Hui Lu<sup>c,\*</sup>

**Affiliation:**

<sup>a</sup> *Shanghai Research Institute of Petrochemical Technology SINOPEC, 201208, Shanghai, P.R.China*

<sup>b</sup> *National Supercomputing Center in Shenzhen, 518055, Shenzhen, P.R. China*

<sup>c</sup> *College of Chemistry and Chemical Engineering, Jiangxi Normal University, Nanchang, 330022, P.R. China*

**Corresponding authors:**

Jianwen Liu Tel:+86 755 86576112; fax: +86 755 86576000; Email: liujw@nscsz.gov.cn

Dejin Kong Tel:+86 21 68462542; fax:+86 21 68462283; Email: kongdj.sshy@sinopec.com

Zhang-Hui Lu Tel: +86 791 88121974; fax: +86 791 88120843; Email:

[luzhanghui@hotmail.com](mailto:luzhanghui@hotmail.com)

**Table S1.** The total energies and vdW energies (eV) of the B-MTW zeolites.

| Structure             | Total energy | vdW energy | Structure                 | Total energy | vdW energy |
|-----------------------|--------------|------------|---------------------------|--------------|------------|
| <i>p</i> (1×2×1) cell | -1339.62     | -12.05     | B(5)-Na-1                 | -1342.70     | -12.75     |
| B(1)-H-1              | -1342.26     | -12.21     | B(5)-Na-2                 | -1342.45     | -12.48     |
| B(1)-H-2              | -1342.96     | -12.88     | B(5)-Na-3                 | -1342.20     | -12.89     |
| B(1)-H-3              | -1342.68     | -12.22     | B(5)-Na-4                 | -1342.31     | -12.91     |
| B(1)-H-4              | -1343.11     | -12.85     | B(6)-Na-1                 | -1342.38     | -12.55     |
| B(1)-H-5              | -1342.52     | -12.14     | B(6)-Na-2                 | -1343.19     | -13.50     |
| B(2)-H-1              | -1343.13     | -12.85     | B(6)-Na-3                 | -1342.74     | -13.02     |
| B(2)-H-2              | -1342.66     | -12.32     | B(7)-Na-1                 | -1342.60     | -12.88     |
| B(2)-H-3              | -1343.03     | -12.98     | B(7)-Na-2                 | -1343.25     | -13.51     |
| B(2)-H-4              | -1342.84     | -12.78     | B(7)-Na-3                 | -1341.73     | -12.80     |
| B(3)-H-1              | -1342.55     | -12.31     | B(1)-K-1                  | -1343.01     | -13.64     |
| B(3)-H-2              | -1342.35     | -12.25     | B(1)-K-2                  | -1341.67     | -12.76     |
| B(3)-H-3              | -1343.09     | -12.92     | B(1)-K-3                  | -1342.64     | -12.51     |
| B(3)-H-4              | -1343.12     | -12.90     | B(1)-K-4                  | -1343.34     | -13.26     |
| B(4)-H-1              | -1342.49     | -12.15     | B(2)-K-1                  | -1342.87     | -12.65     |
| B(4)-H-2              | -1342.47     | -12.36     | B(2)-K-2                  | -1342.25     | -12.91     |
| B(4)-H-3              | -1343.22     | -12.90     | B(2)-K-3                  | -1342.23     | -13.21     |
| B(4)-H-4              | -1342.57     | -12.17     | B(2)-K-4                  | -1342.69     | -12.44     |
| B(5)-H-1              | -1343.16     | -12.83     | B(3)-K-1                  | -1343.37     | -13.27     |
| B(5)-H-2              | -1343.05     | -12.89     | B(3)-K-2                  | -1342.56     | -12.73     |
| B(5)-H-3              | -1342.56     | -12.34     | B(3)-K-3                  | -1341.81     | -12.68     |
| B(5)-H-4              | -1342.98     | -12.82     | B(4)-K-1                  | -1342.59     | -12.49     |
| B(6)-H-1              | -1342.60     | -12.27     | B(4)-K-2                  | -1342.36     | -12.74     |
| B(6)-H-2              | -1343.00     | -12.62     | B(4)-K-3                  | -1341.67     | -12.67     |
| B(6)-H-3              | -1342.24     | -12.21     | B(4)-K-4                  | -1342.84     | -12.67     |
| B(6)-H-4              | -1342.38     | -12.11     | B(5)-K-1                  | -1342.79     | -12.56     |
| B(6)-H-5              | -1342.66     | -12.29     | B(5)-K-2                  | -1342.31     | -13.02     |
| B(7)-H-1              | -1341.29     | -12.23     | B(5)-K-3                  | -1342.03     | -12.75     |
| B(7)-H-2              | -1343.01     | -12.85     | B(6)-K-1                  | -1343.20     | -13.29     |
| B(7)-H-3              | -1342.48     | -12.14     | B(6)-K-2                  | -1342.48     | -12.86     |
| B(7)-H-4              | -1342.37     | -12.26     | B(6)-K-3                  | -1342.48     | -12.95     |
| B(7)-H-5              | -1342.74     | -12.31     | B(7)-K-1                  | -1342.56     | -12.72     |
| B(7)-H-6              | -1342.35     | -12.18     | B(7)-K-2                  | -1342.68     | -12.80     |
| B(1)-Li-1             | -1342.96     | -12.40     | B(7)-K-3                  | -1342.01     | -13.03     |
| B(1)-Li-2             | -1343.68     | -13.75     | B(1)-H-NH <sub>3</sub> -1 | -1363.58     | -13.27     |
| B(1)-Li-3             | -1343.80     | -13.47     | B(1)-H-NH <sub>3</sub> -2 | -1363.12     | -13.49     |
| B(2)-Li-1             | -1343.07     | -12.39     | B(1)-H-NH <sub>3</sub> -3 | -1363.63     | -13.25     |
| B(2)-Li-2             | -1343.74     | -13.54     | B(2)-H-NH <sub>3</sub> -1 | -1363.85     | -13.45     |
| B(2)-Li-3             | -1343.78     | -13.64     | B(2)-H-NH <sub>3</sub> -2 | -1362.88     | -13.52     |
| B(2)-Li-4             | -1343.75     | -13.56     | B(3)-H-NH <sub>3</sub> -1 | -1363.56     | -13.29     |
| B(3)-Li-1             | -1343.13     | -12.50     | B(3)-H-NH <sub>3</sub> -2 | -1363.36     | -13.32     |
| B(3)-Li-2             | -1343.29     | -12.97     | B(3)-H-NH <sub>3</sub> -3 | -1363.81     | -13.42     |
| B(3)-Li-3             | -1343.52     | -13.50     | B(4)-H-NH <sub>3</sub> -1 | -1363.64     | -13.36     |
| B(4)-Li-1             | -1344.16     | -13.82     | B(4)-H-NH <sub>3</sub> -2 | -1363.30     | -13.30     |
| B(4)-Li-2             | -1343.79     | -13.65     | B(4)-H-NH <sub>3</sub> -3 | -1363.68     | -13.22     |
| B(4)-Li-3             | -1343.13     | -12.55     | B(5)-H-NH <sub>3</sub> -1 | -1363.41     | -13.15     |
| B(5)-Li-1             | -1343.18     | -12.64     | B(5)-H-NH <sub>3</sub> -2 | -1363.13     | -13.32     |
| B(5)-Li-2             | -1343.60     | -13.60     | B(5)-H-NH <sub>3</sub> -3 | -1363.62     | -13.28     |
| B(5)-Li-3             | -1344.10     | -13.68     | B(6)-H-NH <sub>3</sub> -1 | -1363.39     | -13.08     |
| B(6)-Li-1             | -1342.99     | -12.41     | B(6)-H-NH <sub>3</sub> -2 | -1363.11     | -13.25     |
| B(6)-Li-2             | -1343.95     | -13.60     | B(7)-H-NH <sub>3</sub> -1 | -1363.28     | -13.19     |
| B(6)-Li-3             | -1343.28     | -13.65     | B(1)-H-Py-1               | -1415.57     | -13.86     |
| B(6)-Li-4             | -1343.87     | -13.43     | B(1)-H-Py-2               | -1415.88     | -14.08     |

|           |          |        |             |          |        |
|-----------|----------|--------|-------------|----------|--------|
| B(7)-Li-1 | -1343.25 | -12.85 | B(2)-H-Py-1 | -1415.43 | -13.86 |
| B(7)-Li-2 | -1343.95 | -13.48 | B(2)-H-Py-2 | -1416.02 | -14.05 |
| B(1)-Na-1 | -1343.22 | -13.38 | B(3)-H-Py-1 | -1415.53 | -13.93 |
| B(1)-Na-2 | -1342.87 | -13.71 | B(3)-H-Py-2 | -1414.74 | -14.04 |
| B(2)-Na-1 | -1342.74 | -12.75 | B(3)-H-Py-3 | -1415.42 | -14.05 |
| B(2)-Na-2 | -1342.37 | -12.46 | B(4)-H-Py-1 | -1415.55 | -14.00 |
| B(2)-Na-3 | -1343.00 | -13.64 | B(4)-H-Py-2 | -1415.85 | -13.99 |
| B(3)-Na-1 | -1343.20 | -13.51 | B(5)-H-Py-1 | -1415.36 | -13.76 |
| B(3)-Na-2 | -1342.43 | -12.50 | B(5)-H-Py-2 | -1414.64 | -13.95 |
| B(3)-Na-3 | -1342.85 | -13.72 | B(6)-H-Py-1 | -1415.29 | -13.61 |
| B(3)-Na-4 | -1342.47 | -12.87 | B(6)-H-Py-2 | -1415.93 | -13.86 |
| B(4)-Na-1 | -1342.72 | -12.89 | B(6)-H-Py-3 | -1414.54 | -13.58 |
| B(4)-Na-2 | -1343.15 | -13.81 | B(7)-H-Py-1 | -1414.55 | -13.92 |
| B(4)-Na-3 | -1342.41 | -12.52 | B(7)-H-Py-2 | -1415.29 | -13.91 |
| B(4)-Na-4 | -1343.11 | -13.47 |             |          |        |

---

**Table S2.** The total energies and vdW energies (eV) of the Al-MTW zeolites.

| Structure  | Total energy | vdW energy | Structure                  | Total energy | vdW energy |
|------------|--------------|------------|----------------------------|--------------|------------|
| Al(1)-H-1  | -1341.81     | -12.70     | Al(6)-Na-3                 | -1342.22     | -13.15     |
| Al(1)-H-2  | -1341.01     | -12.21     | Al(7)-Na-1                 | -1342.08     | -13.57     |
| Al(2)-H-1  | -1341.76     | -12.85     | Al(7)-Na-2                 | -1342.38     | -13.52     |
| Al(2)-H-2  | -1341.76     | -12.99     | Al(7)-Na-3                 | -1342.39     | -13.51     |
| Al(2)-H-3  | -1341.77     | -12.87     | Al(7)-Na-4                 | -1341.88     | -12.95     |
| Al(3)-H-1  | -1341.88     | -12.76     | Al(1)-K-1                  | -1342.17     | -13.49     |
| Al(3)-H-2  | -1341.73     | -12.96     | Al(1)-K-2                  | -1341.23     | -13.16     |
| Al(3)-H-3  | -1341.67     | -13.05     | Al(1)-K-3                  | -1342.30     | -13.13     |
| Al(4)-H-1  | -1341.82     | -12.78     | Al(2)-K-1                  | -1341.85     | -12.61     |
| Al(4)-H-2  | -1341.74     | -12.75     | Al(2)-K-2                  | -1341.87     | -13.50     |
| Al(4)-H-3  | -1341.58     | -13.00     | Al(2)-K-3                  | -1342.44     | -13.48     |
| Al(4)-H-4  | -1341.98     | -12.87     | Al(2)-K-4                  | -1341.44     | -13.10     |
| Al(5)-H-1  | -1341.71     | -12.83     | Al(3)-K-1                  | -1342.49     | -13.34     |
| Al(5)-H-2  | -1341.82     | -12.85     | Al(3)-K-2                  | -1341.41     | -13.12     |
| Al(5)-H-3  | -1341.70     | -12.91     | Al(3)-K-3                  | -1342.29     | -13.24     |
| Al(6)-H-1  | -1341.71     | -12.84     | Al(4)-K-1                  | -1341.78     | -12.44     |
| Al(6)-H-2  | -1341.82     | -13.01     | Al(4)-K-2                  | -1341.87     | -13.27     |
| Al(6)-H-3  | -1341.81     | -12.90     | Al(4)-K-3                  | -1341.03     | -12.68     |
| Al(6)-H-4  | -1341.34     | -12.91     | Al(4)-K-4                  | -1342.42     | -13.29     |
| Al(7)-H-1  | -1341.62     | -12.81     | Al(5)-K-1                  | -1342.29     | -13.23     |
| Al(7)-H-2  | -1341.61     | -12.93     | Al(5)-K-2                  | -1342.25     | -13.17     |
| Al(7)-H-3  | -1341.86     | -13.00     | Al(5)-K-3                  | -1341.84     | -13.56     |
| Al(7)-H-4  | -1341.84     | -12.87     | Al(5)-K-4                  | -1341.83     | -13.51     |
| Al(1)-Li-1 | -1342.29     | -13.35     | Al(6)-K-1                  | -1341.75     | -12.38     |
| Al(1)-Li-2 | -1342.92     | -13.47     | Al(6)-K-2                  | -1342.39     | -13.22     |
| Al(1)-Li-3 | -1342.87     | -13.55     | Al(6)-K-3                  | -1342.16     | -13.53     |
| Al(1)-Li-4 | -1342.86     | -13.36     | Al(6)-K-4                  | -1341.89     | -13.36     |
| Al(2)-Li-1 | -1342.77     | -13.23     | Al(7)-K-1                  | -1342.19     | -13.39     |
| Al(2)-Li-2 | -1342.82     | -13.44     | Al(7)-K-2                  | -1341.93     | -13.36     |
| Al(2)-Li-3 | -1342.73     | -13.47     | Al(1)-H-NH <sub>3</sub> -1 | -1361.59     | -13.15     |
| Al(2)-Li-4 | -1342.94     | -13.73     | Al(1)-H-NH <sub>3</sub> -2 | -1362.10     | -13.24     |
| Al(3)-Li-1 | -1342.64     | -13.04     | Al(1)-H-NH <sub>3</sub> -3 | -1362.88     | -12.98     |
| Al(3)-Li-2 | -1342.87     | -13.40     | Al(2)-H-NH <sub>3</sub> -1 | -1362.26     | -13.20     |
| Al(3)-Li-3 | -1342.75     | -13.61     | Al(2)-H-NH <sub>3</sub> -2 | -1362.73     | -13.18     |
| Al(4)-Li-1 | -1342.94     | -13.47     | Al(2)-H-NH <sub>3</sub> -1 | -1362.98     | -13.19     |
| Al(4)-Li-2 | -1342.70     | -13.30     | Al(3)-H-NH <sub>3</sub> -1 | -1361.86     | -13.25     |
| Al(4)-Li-3 | -1342.56     | -13.09     | Al(3)-H-NH <sub>3</sub> -2 | -1361.53     | -13.22     |
| Al(4)-Li-1 | -1342.67     | -13.24     | Al(4)-H-NH <sub>3</sub> -1 | -1362.16     | -13.38     |
| Al(5)-Li-2 | -1342.57     | -13.47     | Al(4)-H-NH <sub>3</sub> -2 | -1362.78     | -13.15     |
| Al(5)-Li-3 | -1343.07     | -13.69     | Al(4)-H-NH <sub>3</sub> -3 | -1362.34     | -13.18     |
| Al(6)-Li-1 | -1342.92     | -13.33     | Al(5)-H-NH <sub>3</sub> -1 | -1362.14     | -13.17     |
| Al(6)-Li-2 | -1342.25     | -13.37     | Al(5)-H-NH <sub>3</sub> -2 | -1362.70     | -12.98     |
| Al(6)-Li-3 | -1342.91     | -13.47     | Al(5)-H-NH <sub>3</sub> -3 | -1362.23     | -13.13     |
| Al(7)-Li-1 | -1342.82     | -13.46     | Al(6)-H-NH <sub>3</sub> -1 | -1362.43     | -13.40     |
| Al(7)-Li-2 | -1342.67     | -13.40     | Al(6)-H-NH <sub>3</sub> -2 | -1362.94     | -13.29     |
| Al(7)-Li-3 | -1342.24     | -12.78     | Al(6)-H-NH <sub>3</sub> -3 | -1362.81     | -13.10     |
| Al(7)-Li-4 | -1343.06     | -13.54     | Al(7)-H-NH <sub>3</sub> -1 | -1362.21     | -13.28     |
| Al(1)-Na-1 | -1342.26     | -13.23     | Al(7)-H-NH <sub>3</sub> -2 | -1362.10     | -13.63     |
| Al(1)-Na-2 | -1341.96     | -13.53     | Al(1)-H-Py-1               | -1415.56     | -13.72     |
| Al(2)-Na-1 | -1342.22     | -13.31     | Al(1)-H-Py-2               | -1414.20     | -13.70     |
| Al(2)-Na-2 | -1342.13     | -13.60     | Al(2)-H-Py-1               | -1414.87     | -13.71     |
| Al(3)-Na-1 | -1342.37     | -13.41     | Al(2)-H-Py-2               | -1415.00     | -13.72     |
| Al(3)-Na-2 | -1342.18     | -13.41     | Al(3)-H-Py                 | -1414.32     | -13.99     |
|            |              |            | Al(4)-H-Py-1               |              |            |

|            |          |        |              |          |        |
|------------|----------|--------|--------------|----------|--------|
| Al(4)-Na-1 | -1342.30 | -13.20 | Al(4)-H-Py-2 | -1414.56 | -13.88 |
| Al(4)-Na-2 | -1342.03 | -13.36 | Al(5)-H-Py-1 | -1414.23 | -13.66 |
| Al(5)-Na-1 | -1342.28 | -13.22 | Al(5)-H-Py-2 | -1415.00 | -13.73 |
| Al(5)-Na-2 | -1342.46 | -13.48 | Al(6)-H-Py-1 | -1414.27 | -13.81 |
| Al(5)-Na-3 | -1341.69 | -13.46 | Al(6)-H-Py-2 | -1414.96 | -13.63 |
| Al(6)-Na-1 | -1342.29 | -13.48 | Al(7)-H-Py   | -1414.63 | -13.67 |
| Al(6)-Na-2 | -1341.92 | -12.93 |              |          |        |

---

**Table S3.** The total energies and vdW energies (eV) of the Ga-MTW zeolites.

| Structure  | Total energy | vdW energy | Structure                  | Total energy | vdW energy |
|------------|--------------|------------|----------------------------|--------------|------------|
| Ga(1)-H-1  | -1338.03     | -12.96     | Ga(4)-Na-2                 | -1337.71     | -12.59     |
| Ga(1)-H-2  | -1337.73     | -13.19     | Ga(4)-Na-3                 | -1337.62     | -13.00     |
| Ga(1)-H-3  | -1338.06     | -13.07     | Ga(4)-Na-4                 | -1338.78     | -13.49     |
| Ga(1)-H-4  | -1337.96     | -12.98     | Ga(5)-Na-1                 | -1338.35     | -13.41     |
| Ga(2)-H-1  | -1338.05     | -13.14     | Ga(5)-Na-2                 | -1338.34     | -13.66     |
| Ga(2)-H-2  | -1338.02     | -13.11     | Ga(5)-Na-3                 | -1337.50     | -12.99     |
| Ga(2)-H-3  | -1337.95     | -13.03     | Ga(6)-Na-1                 | -1338.49     | -13.40     |
| Ga(2)-H-4  | -1338.05     | -13.27     | Ga(6)-Na-2                 | -1338.50     | -13.76     |
| Ga(2)-H-5  | -1338.02     | -13.10     | Ga(7)-Na-1                 | -1337.81     | -12.89     |
| Ga(3)-H-1  | -1338.13     | -12.92     | Ga(7)-Na-2                 | -1338.60     | -13.86     |
| Ga(3)-H-2  | -1338.08     | -13.23     | Ga(7)-Na-3                 | -1337.12     | -12.96     |
| Ga(3)-H-3  | -1337.93     | -13.22     | Ga(1)-K-1                  | -1338.29     | -13.59     |
| Ga(3)-H-4  | -1338.12     | -12.98     | Ga(1)-K-2                  | -1337.40     | -13.30     |
| Ga(4)-H-1  | -1338.06     | -13.04     | Ga(1)-K-3                  | -1338.54     | -13.44     |
| Ga(4)-H-2  | -1337.86     | -12.85     | Ga(1)-K-4                  | -1338.45     | -13.22     |
| Ga(4)-H-3  | -1337.91     | -13.12     | Ga(2)-K-1                  | -1338.42     | -13.33     |
| Ga(4)-H-4  | -1338.22     | -12.98     | Ga(2)-K-2                  | -1338.02     | -13.67     |
| Ga(5)-H-1  | -1337.95     | -13.01     | Ga(2)-K-3                  | -1338.53     | -13.54     |
| Ga(5)-H-2  | -1337.81     | -13.08     | Ga(2)-K-4                  | -1337.64     | -13.37     |
| Ga(5)-H-3  | -1338.12     | -13.04     | Ga(3)-K-1                  | -1338.69     | -13.40     |
| Ga(5)-H-4  | -1337.86     | -13.03     | Ga(3)-K-2                  | -1337.68     | -13.39     |
| Ga(5)-H-5  | -1338.12     | -12.93     | Ga(3)-K-3                  | -1338.44     | -13.36     |
| Ga(6)-H-1  | -1338.02     | -13.16     | Ga(4)-K-1                  | -1338.13     | -13.64     |
| Ga(6)-H-2  | -1338.09     | -13.06     | Ga(4)-K-2                  | -1337.86     | -12.51     |
| Ga(6)-H-3  | -1338.00     | -12.95     | Ga(4)-K-3                  | -1337.10     | -12.76     |
| Ga(6)-H-4  | -1337.69     | -13.00     | Ga(4)-K-4                  | -1338.67     | -13.43     |
| Ga(6)-H-5  | -1337.68     | -13.03     | Ga(5)-K-1                  | -1338.71     | -13.24     |
| Ga(6)-H-6  | -1338.02     | -13.17     | Ga(5)-K-2                  | -1338.04     | -13.64     |
| Ga(7)-H-1  | -1338.01     | -13.08     | Ga(5)-K-3                  | -1337.99     | -13.59     |
| Ga(7)-H-2  | -1338.01     | -13.00     | Ga(6)-K-1                  | -1338.48     | -13.22     |
| Ga(7)-H-3  | -1337.91     | -13.09     | Ga(6)-K-2                  | -1338.18     | -13.64     |
| Ga(7)-H-4  | -1337.86     | -13.15     | Ga(6)-K-3                  | -1338.30     | -13.68     |
| Ga(7)-H-5  | -1337.97     | -13.17     | Ga(7)-K-1                  | -1338.36     | -13.48     |
| Ga(7)-H-6  | -1338.03     | -13.01     | Ga(7)-K-2                  | -1338.13     | -13.46     |
| Ga(1)-Li-1 | -1338.16     | -12.50     | Ga(1)-H-NH <sub>3</sub> -1 | -1359.01     | -13.37     |
| Ga(1)-Li-2 | -1338.74     | -13.46     | Ga(1)-H-NH <sub>3</sub> -2 | -1357.97     | -13.41     |
| Ga(1)-Li-3 | -1339.10     | -13.64     | Ga(1)-H-NH <sub>3</sub> -3 | -1358.34     | -13.51     |
| Ga(1)-Li-4 | -1339.25     | -13.41     | Ga(1)-H-NH <sub>3</sub> -4 | -1358.59     | -13.67     |
| Ga(2)-Li-1 | -1339.06     | -13.37     | Ga(2)-H-NH <sub>3</sub> -1 | -1359.03     | -13.40     |
| Ga(2)-Li-2 | -1339.13     | -13.56     | Ga(2)-H-NH <sub>3</sub> -2 | -1358.14     | -13.57     |
| Ga(2)-Li-3 | -1339.08     | -13.64     | Ga(3)-H-NH <sub>3</sub> -1 | -1359.15     | -13.29     |
| Ga(3)-Li-1 | -1338.95     | -13.21     | Ga(3)-H-NH <sub>3</sub> -2 | -1358.39     | -13.48     |
| Ga(3)-Li-2 | -1339.07     | -13.66     | Ga(4)-H-NH <sub>3</sub> -1 | -1358.84     | -13.39     |
| Ga(3)-Li-3 | -1339.02     | -13.51     | Ga(4)-H-NH <sub>3</sub> -2 | -1358.18     | -13.33     |
| Ga(4)-Li-1 | -1339.13     | -13.86     | Ga(4)-H-NH <sub>3</sub> -3 | -1359.05     | -13.44     |
| Ga(4)-Li-2 | -1338.93     | -13.66     | Ga(5)-H-NH <sub>3</sub> -1 | -1358.66     | -13.29     |
| Ga(4)-Li-3 | -1338.80     | -13.23     | Ga(5)-H-NH <sub>3</sub> -2 | -1358.30     | -13.43     |
| Ga(5)-Li-1 | -1339.26     | -13.46     | Ga(5)-H-NH <sub>3</sub> -3 | -1358.92     | -13.30     |
| Ga(5)-Li-2 | -1338.84     | -13.36     | Ga(6)-H-NH <sub>3</sub> -1 | -1357.89     | -13.39     |
| Ga(5)-Li-3 | -1338.77     | -13.63     | Ga(6)-H-NH <sub>3</sub> -2 | -1359.01     | -13.26     |
| Ga(5)-Li-4 | -1339.31     | -13.85     | Ga(6)-H-NH <sub>3</sub> -3 | -1358.73     | -13.63     |
| Ga(6)-Li-1 | -1339.11     | -13.38     | Ga(6)-H-NH <sub>3</sub> -4 | -1358.18     | -13.49     |
| Ga(6)-Li-2 | -1338.77     | -13.35     | Ga(7)-H-NH <sub>3</sub> -1 | -1358.95     | -13.32     |

|            |          |        |              |          |        |
|------------|----------|--------|--------------|----------|--------|
| Ga(6)-Li-3 | -1339.18 | -13.57 | Ga(1)-H-Py-1 | -1409.85 | -14.00 |
| Ga(7)-Li-1 | -1338.94 | -13.61 | Ga(1)-H-Py-2 | -1411.19 | -14.06 |
| Ga(7)-Li-2 | -1338.85 | -13.50 | Ga(2)-H-Py-1 | -1410.14 | -14.11 |
| Ga(7)-Li-3 | -1338.45 | -12.93 | Ga(2)-H-Py-2 | -1411.16 | -13.98 |
| Ga(7)-Li-4 | -1339.35 | -13.77 | Ga(3)-H-Py-1 | -1410.98 | -13.70 |
| Ga(1)-Na-1 | -1337.58 | -12.53 | Ga(3)-H-Py-2 | -1409.92 | -13.96 |
| Ga(1)-Na-2 | -1338.24 | -13.65 | Ga(4)-H-Py-1 | -1410.86 | -14.07 |
| Ga(1)-Na-3 | -1338.45 | -13.58 | Ga(4)-H-Py-2 | -1411.17 | -13.96 |
| Ga(2)-Na-1 | -1338.35 | -13.35 | Ga(5)-H-Py-1 | -1410.65 | -13.87 |
| Ga(2)-Na-2 | -1338.41 | -13.51 | Ga(5)-H-Py-2 | -1411.09 | -13.95 |
| Ga(2)-Na-3 | -1338.30 | -13.74 | Ga(6)-H-Py-1 | -1409.78 | -13.94 |
| Ga(3)-Na-1 | -1338.51 | -13.52 | Ga(6)-H-Py-2 | -1411.14 | -13.94 |
| Ga(3)-Na-2 | -1338.29 | -13.69 | Ga(7)-H-Py-1 | -1410.71 | -14.09 |
| Ga(4)-Na-1 | -1338.71 | -13.60 |              |          |        |

**Fig. S1.** Local structures and relative energies (eV) of the HB-MTW zeolites. H, O, B and Si atoms are shown in white, red, green and yellow, respectively. Relative energy of the most stable structure is 0 eV, relative energies of the other structures are given with respect to the most stable structure. (Only related atoms were selectively shown for good viewing)

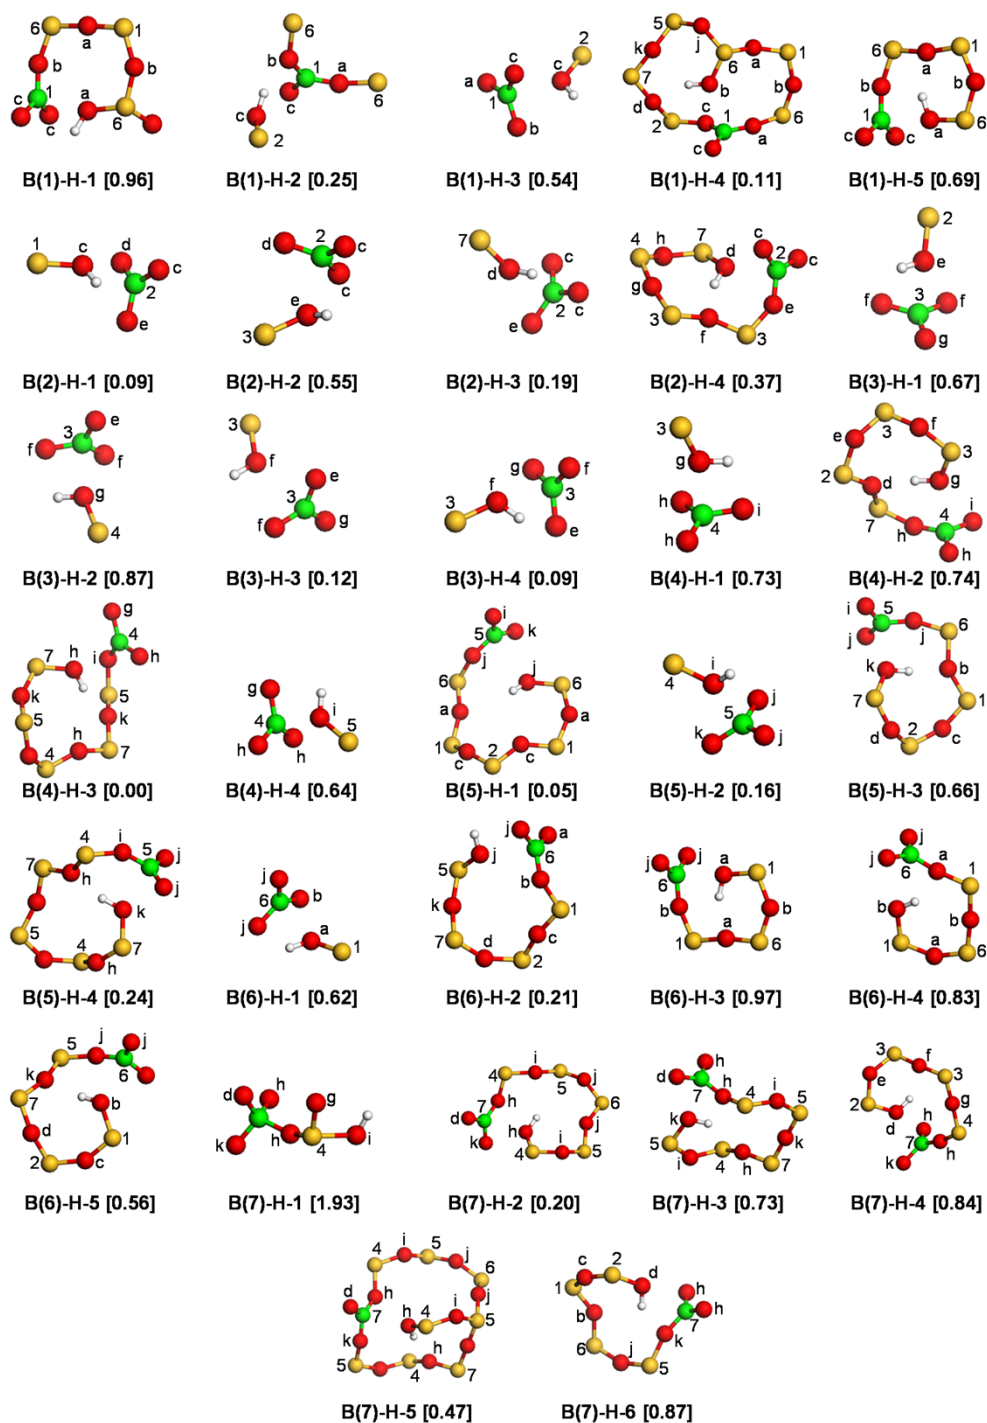



**Fig. S2.** Local structures and relative energies (eV) for LiB-MTW zeolites. Li, O, B and Si atoms are shown in dark gray, red, green and yellow, respectively. Relative energy of the most stable structure is 0 eV, and the relative energies of the other structures are given with respect to the most stable structure. (Only related atoms were selectively shown for good viewing)

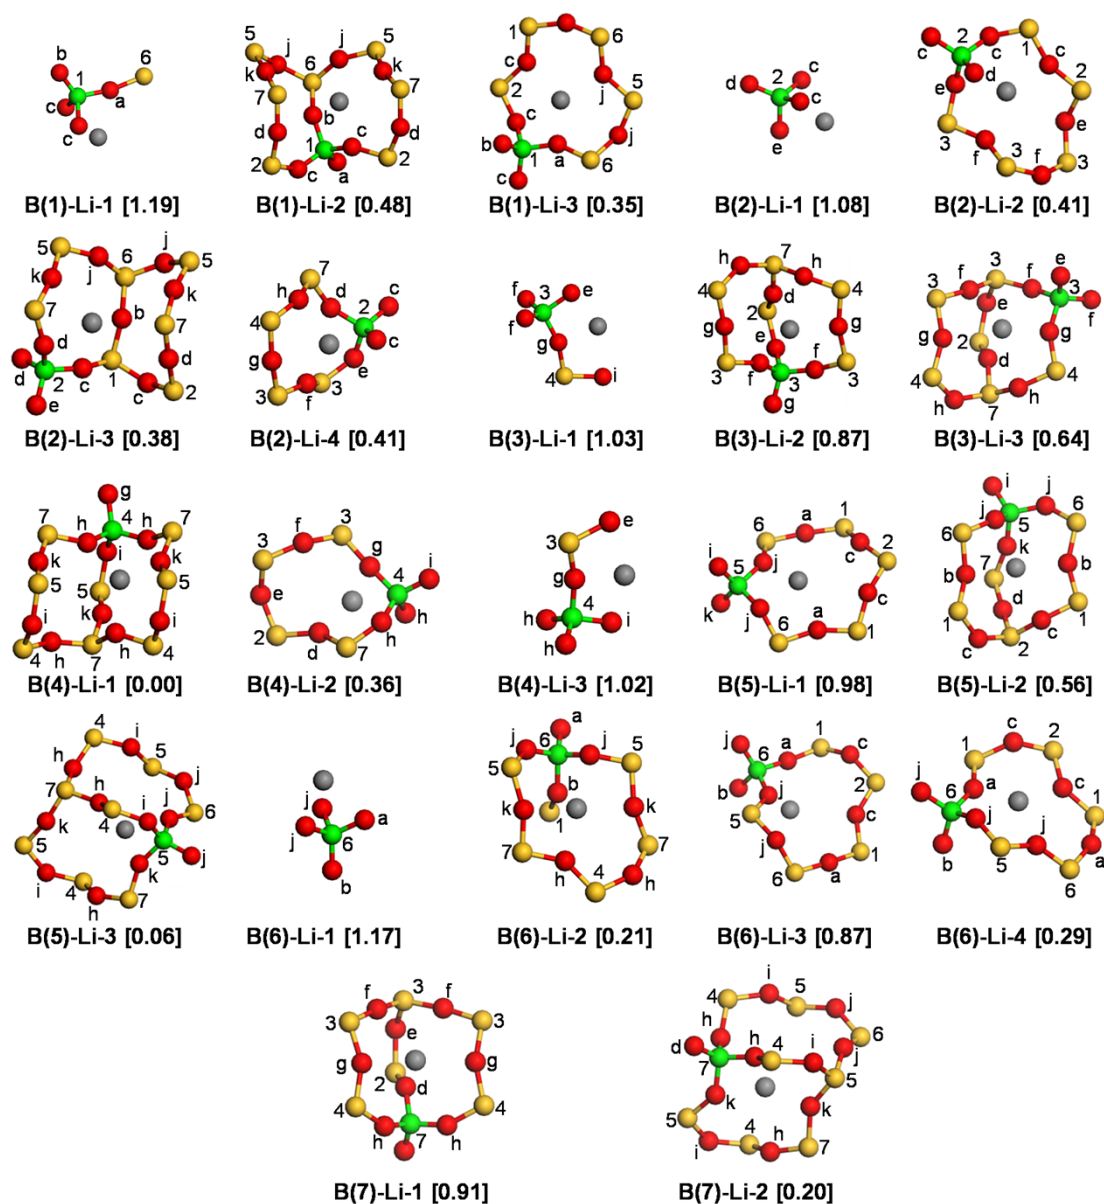

**Fig. S3.** Local structures and relative energies (eV) for NaB-MTW zeolites. Na, O, B and Si atoms are shown in violet, red, green and yellow, respectively. Relative energy of the most stable structure is 0 eV, the relative energies of the other structures are given with respect to the most stable structure. (Only related atoms were selectively shown for good viewing)

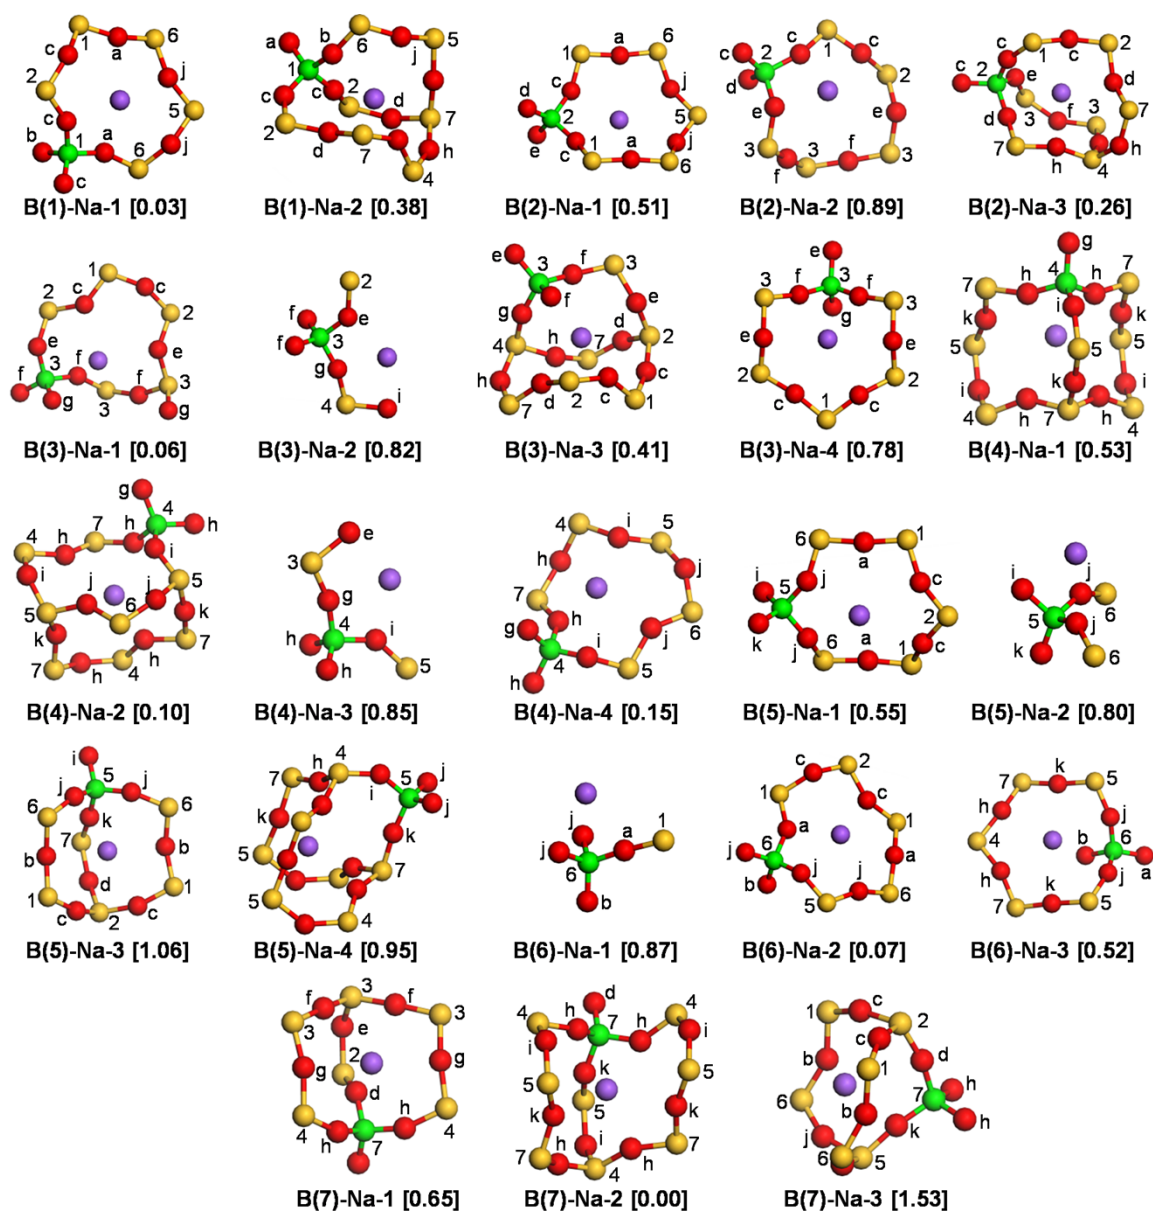

**Fig. S4.** Local structures and relative energies (eV) for KB-MTW zeolites. K, O, B and Si atoms are shown in darkslateblue, red, green and yellow, respectively. Relative energy of the most stable structure is 0 eV, relative energies of the other structures are given with respect to the most stable structure. (Only related atoms were selectively shown for good viewing)

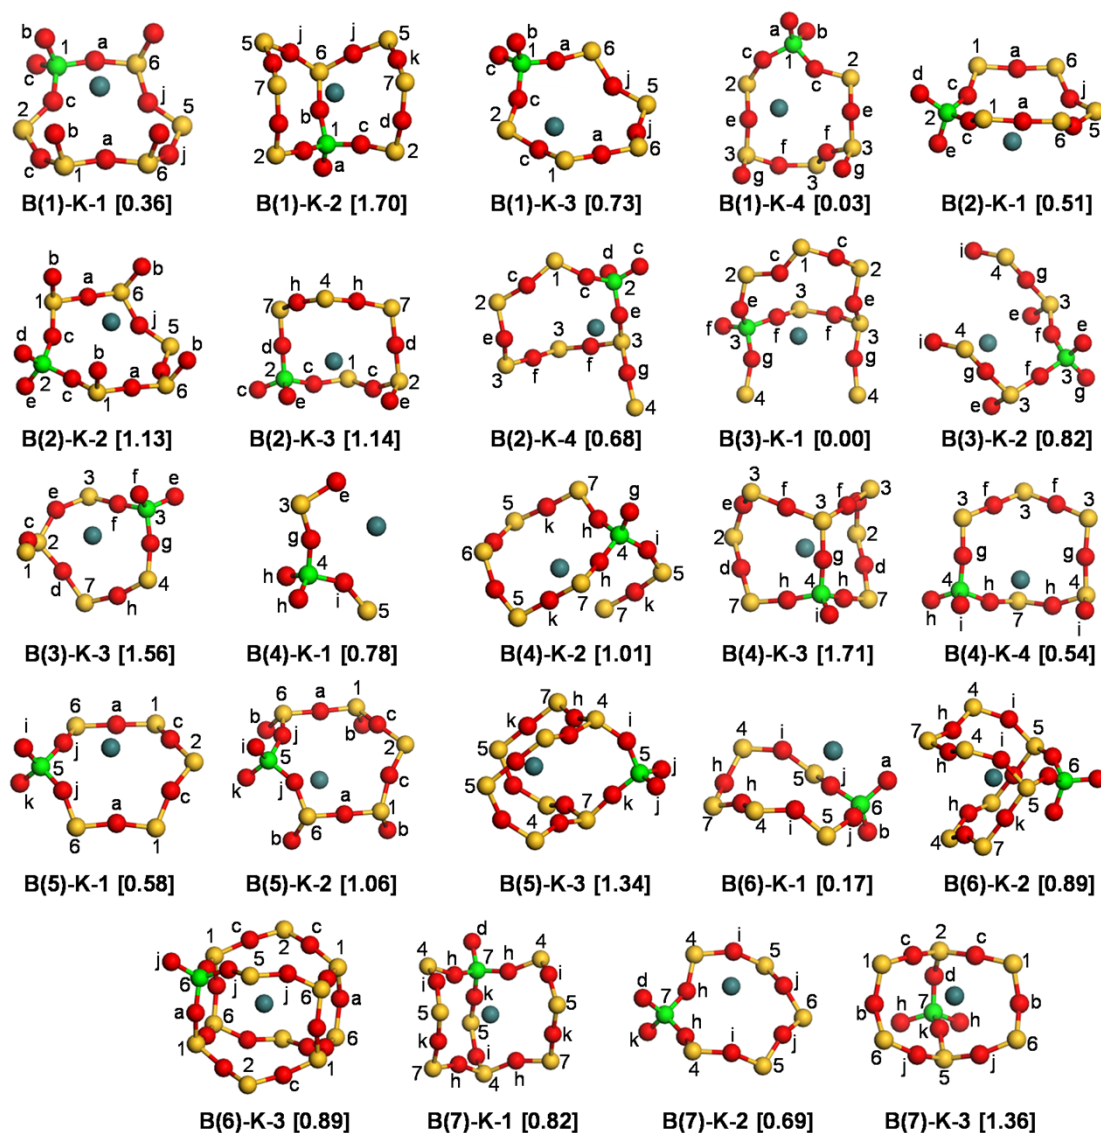

**Fig. S5.** Local structures and relative energies (eV) of the HAl-MTW zeolites. H, O, Al and Si atoms are shown in white, red, gray and yellow, respectively. Relative energy of the most stable structure is 0 eV, relative energies of the other structures are given with respect to the most stable structure. (Only related atoms were selectively shown for good viewing)

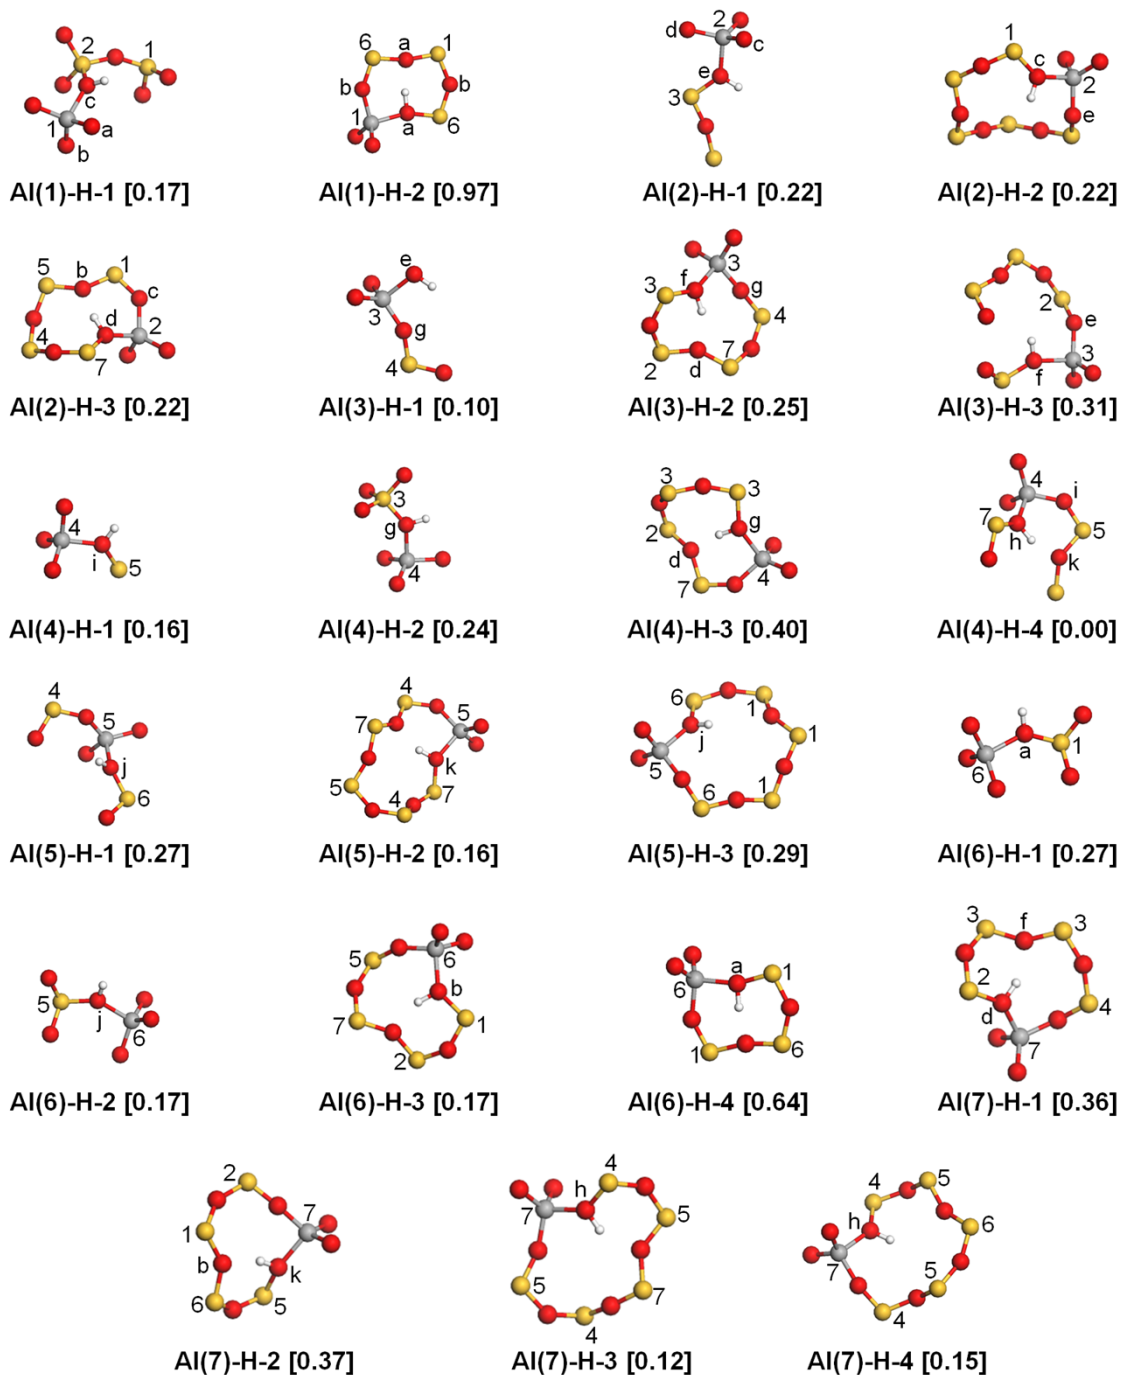

**Fig. S6.** Local structures and relative energies (eV) for LiAl-MTW zeolites. Li, O, Al and Si atoms are shown in dark gray, red, gray and yellow, respectively. Relative energy of the most stable structure is 0 eV, and the relative energies of the other structures are given with respect to the most stable structure. (Only related atoms were selectively shown for good viewing)

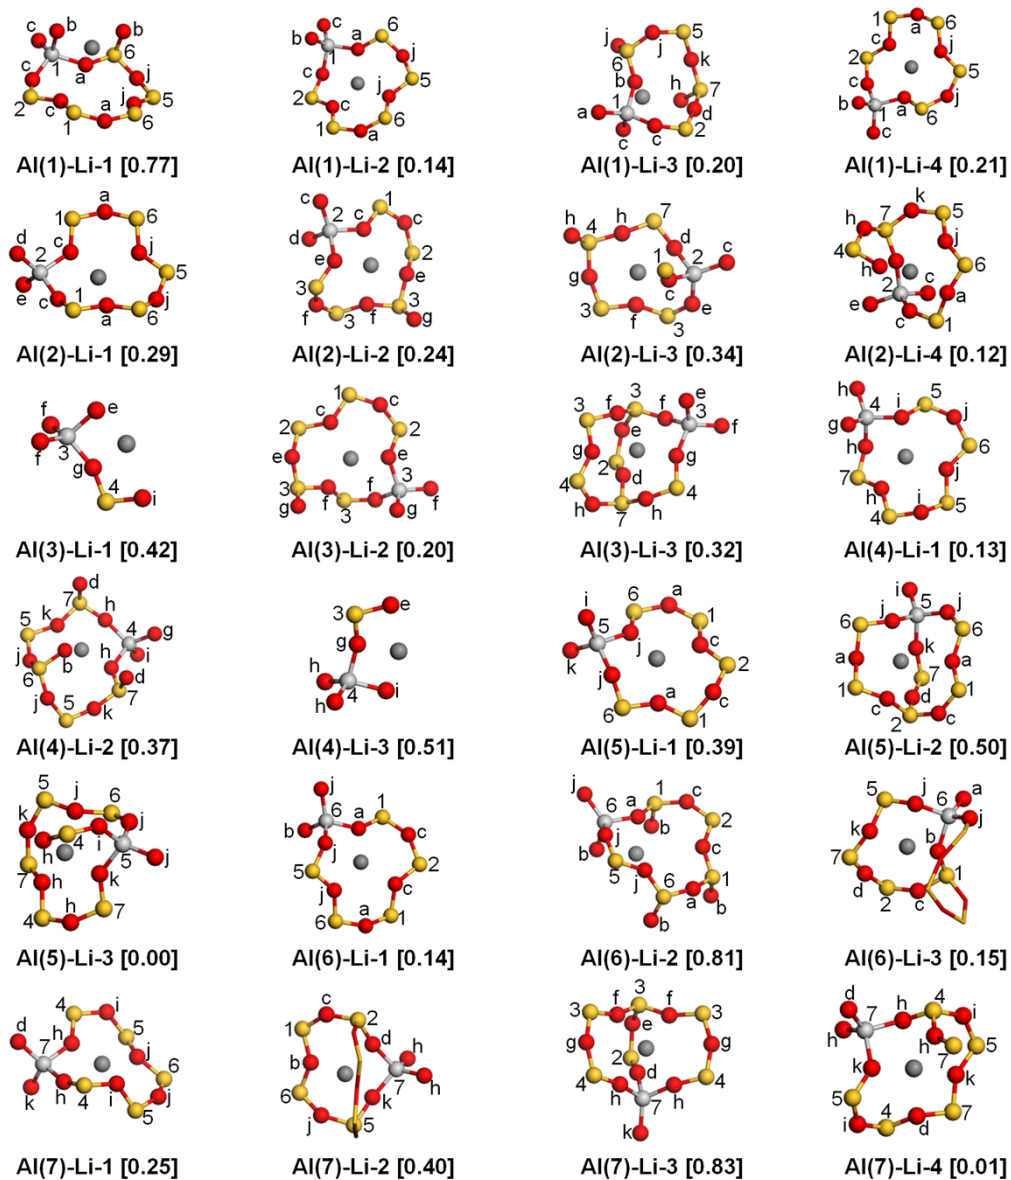

**Fig. S7.** Local structures and relative energies (eV) for NaAl-MTW zeolites. Na, O, Al and Si atoms are shown in violet, red, gray and, yellow, respectively. Relative energy of the most stable structure is 0 eV, the relative energies of the other structures are given with respect to the most stable structure. (Only related atoms were selectively shown for good viewing)

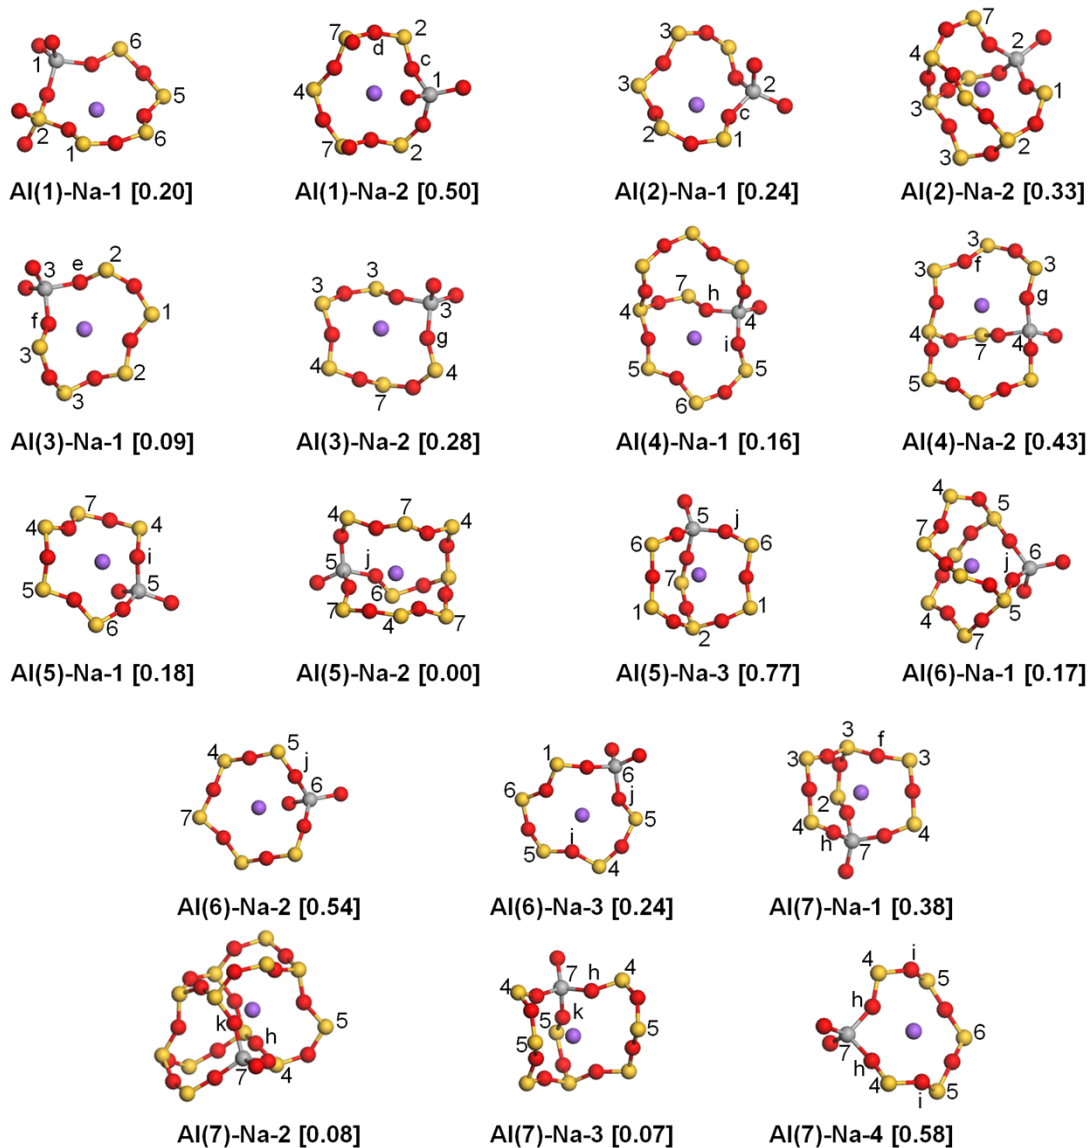

**Fig. S8.** Local structures and relative energies (eV) for KAl-MTW zeolites. K, O, Al and Si atoms are shown in darkslateblue, red, gray and yellow, respectively. Relative energy of the most stable structure is 0 eV, relative energies of the other structures are given with respect to the most stable structure. (Only related atoms were selectively shown for good viewing)

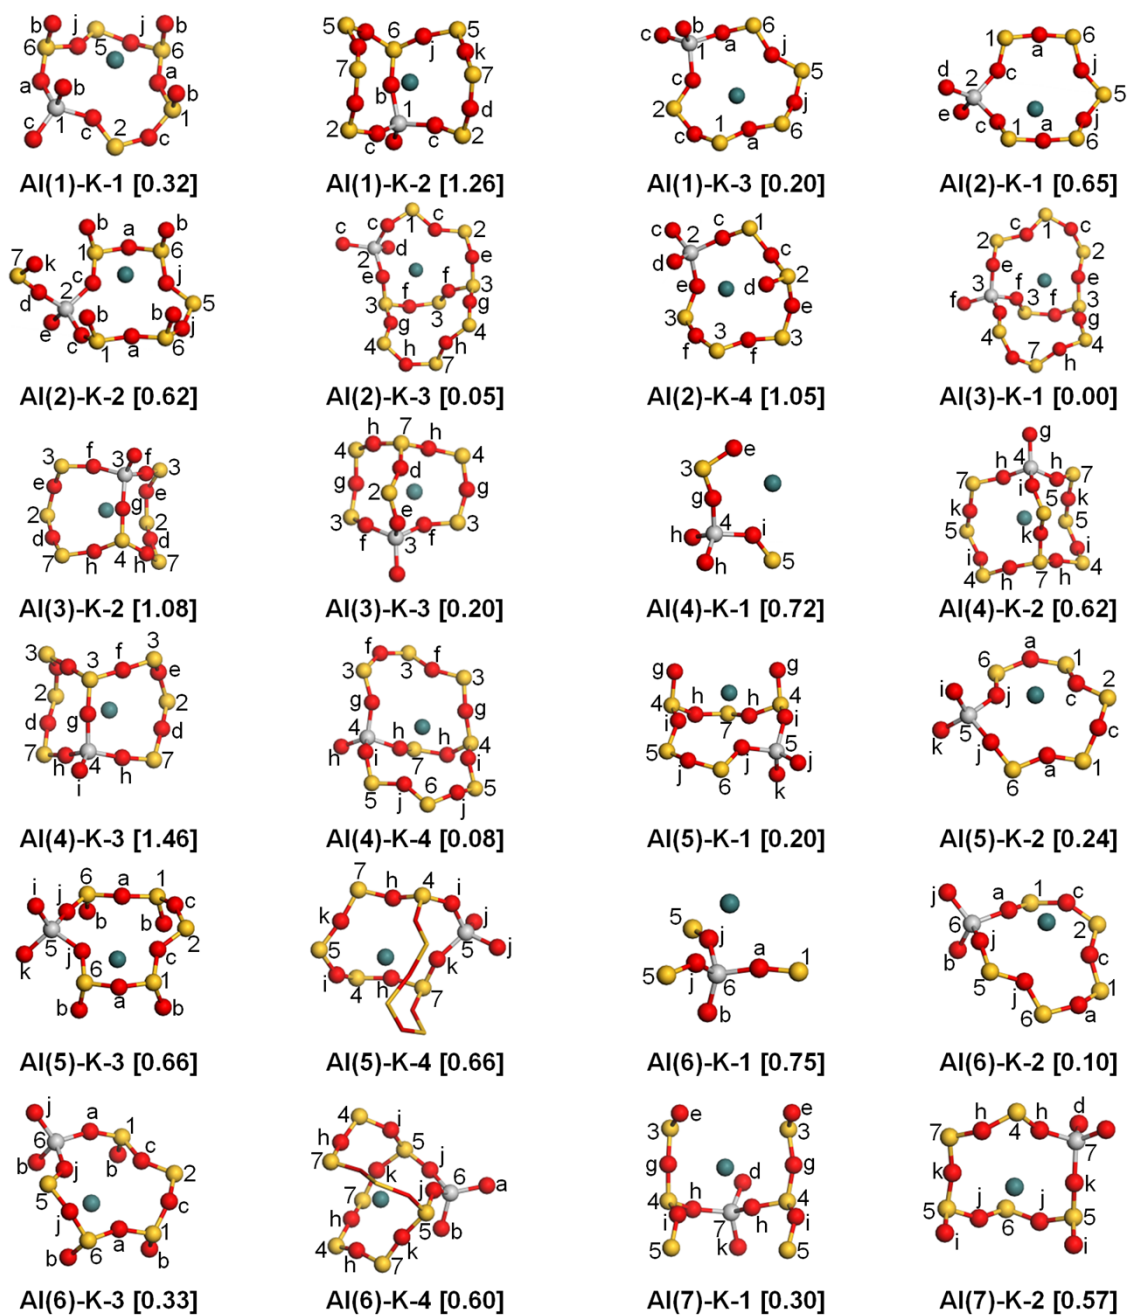

**Fig. S9.** Local structures and relative energies (eV) of the HGa-MTW zeolites. H, O, Ga and Si atoms are shown in white, red, tan and yellow, respectively. Relative energy of the most stable structure is 0 eV, relative energies of the other structures are given with respect to the most stable structure. (Only related atoms were selectively shown for good viewing)

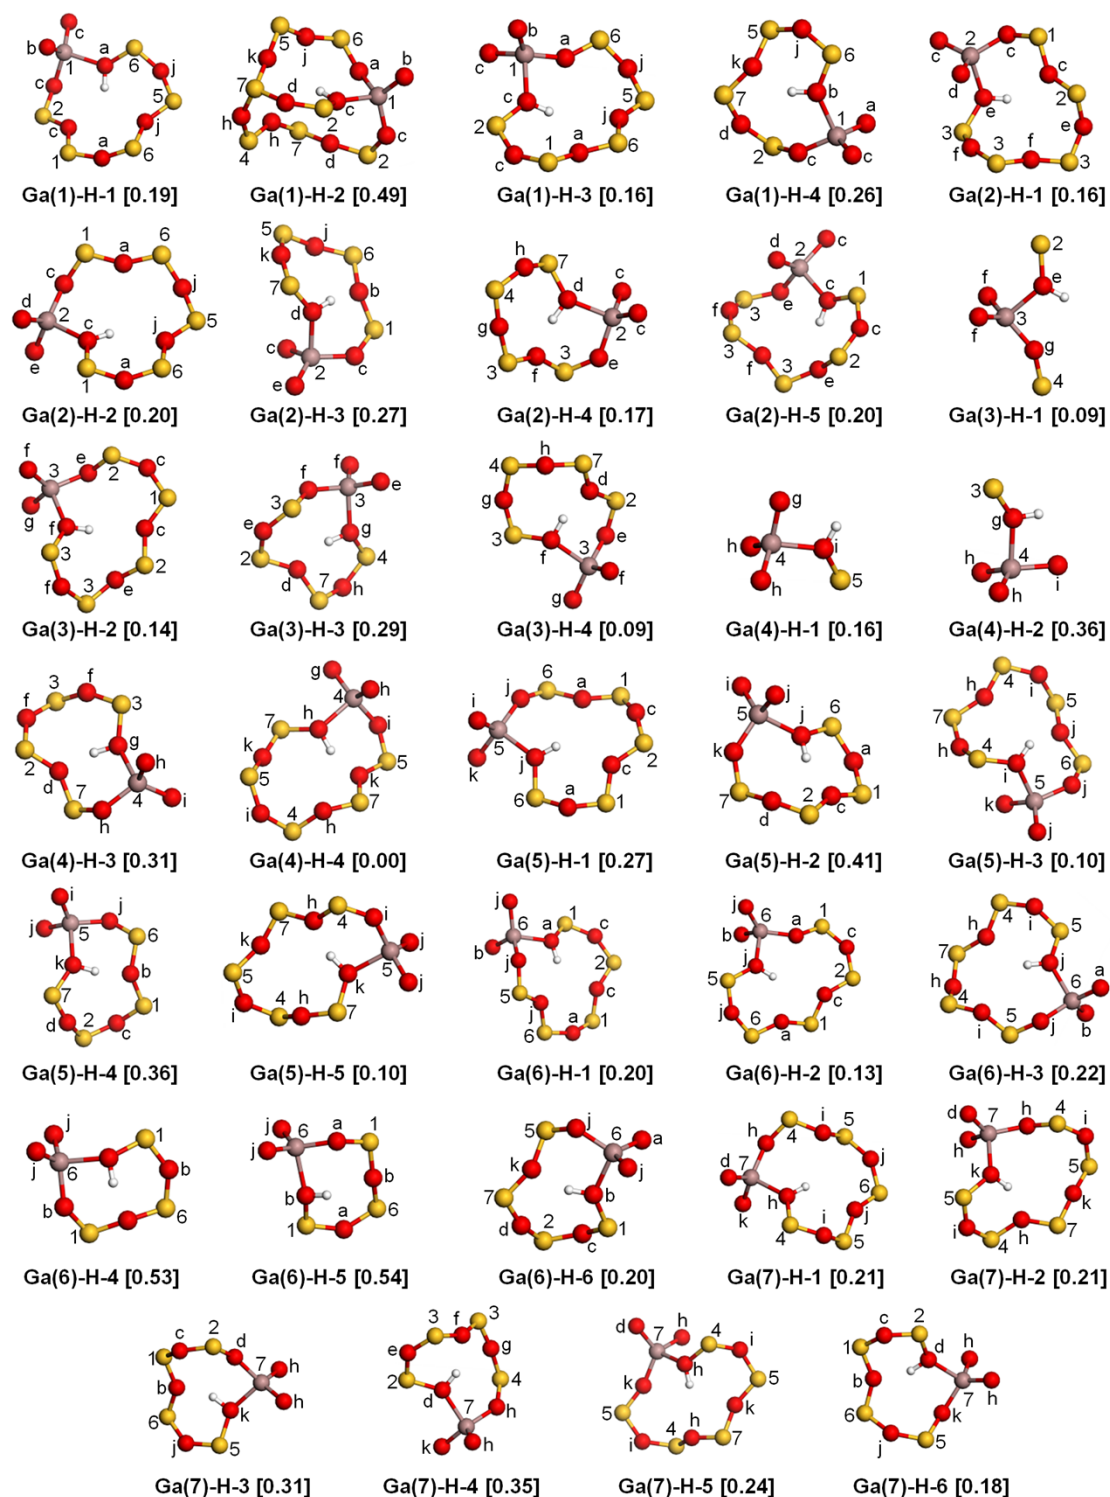



**Fig. S10.** Local structures and relative energies (eV) for LiGa-MTW zeolites. Li, O, Ga and Si atoms are shown in dark gray, red, tan and yellow, respectively. Relative energy of the most stable structure is 0 eV, and the relative energies of the other structures are given with respect to the most stable structure. (Only related atoms were selectively shown for good viewing)

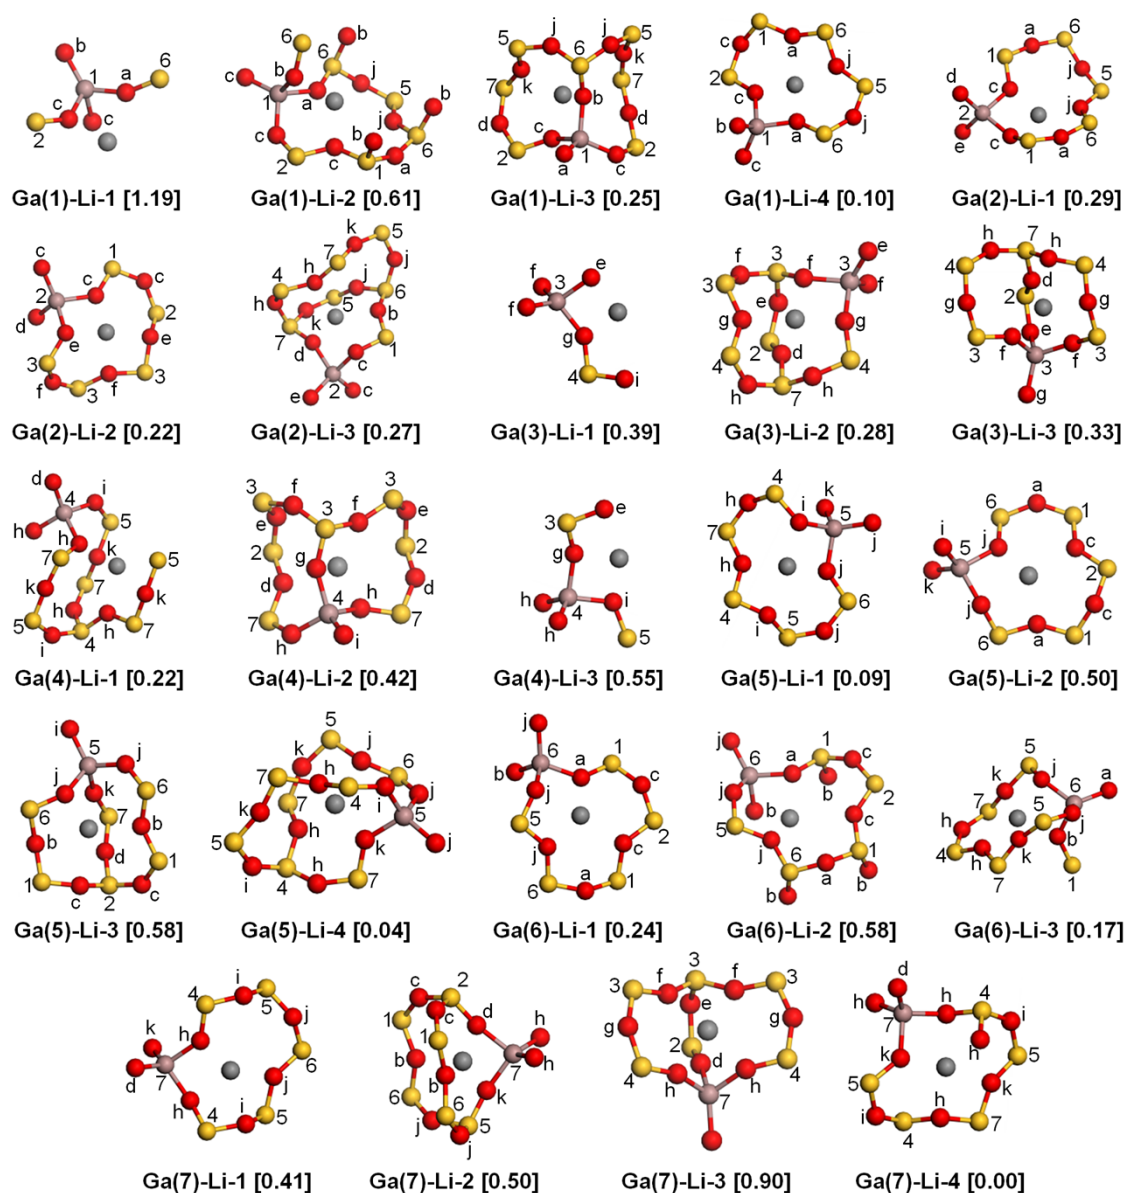

**Fig. S11.** Local structures and relative energies (eV) for NaGa-MTW zeolites. Na, O, Ga and Si atoms are shown in violet, red, tan and yellow, respectively. Relative energy of the most stable structure is 0 eV, the relative energies of the other structures are given with respect to the most stable structure. (Only related atoms were selectively shown for good viewing)

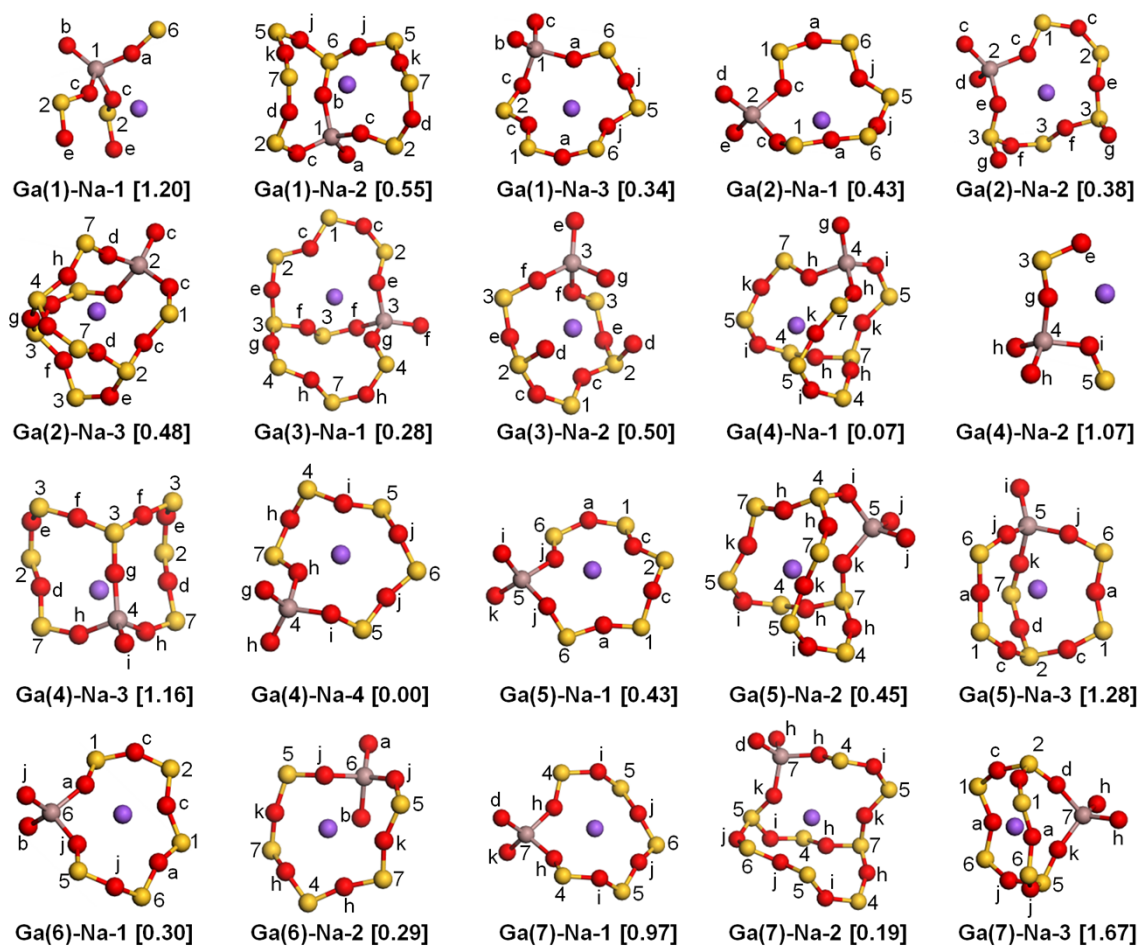

**Fig. S12.** Local structures and relative energies (eV) for KGa-MTW zeolites. K, O, Ga and Si atoms are shown in darkslateblue, red, tan and yellow, respectively. Relative energy of the most stable structure is 0 eV, relative energies of the other structures are given with respect to the most stable structure. (Only related atoms were selectively shown for good viewing)

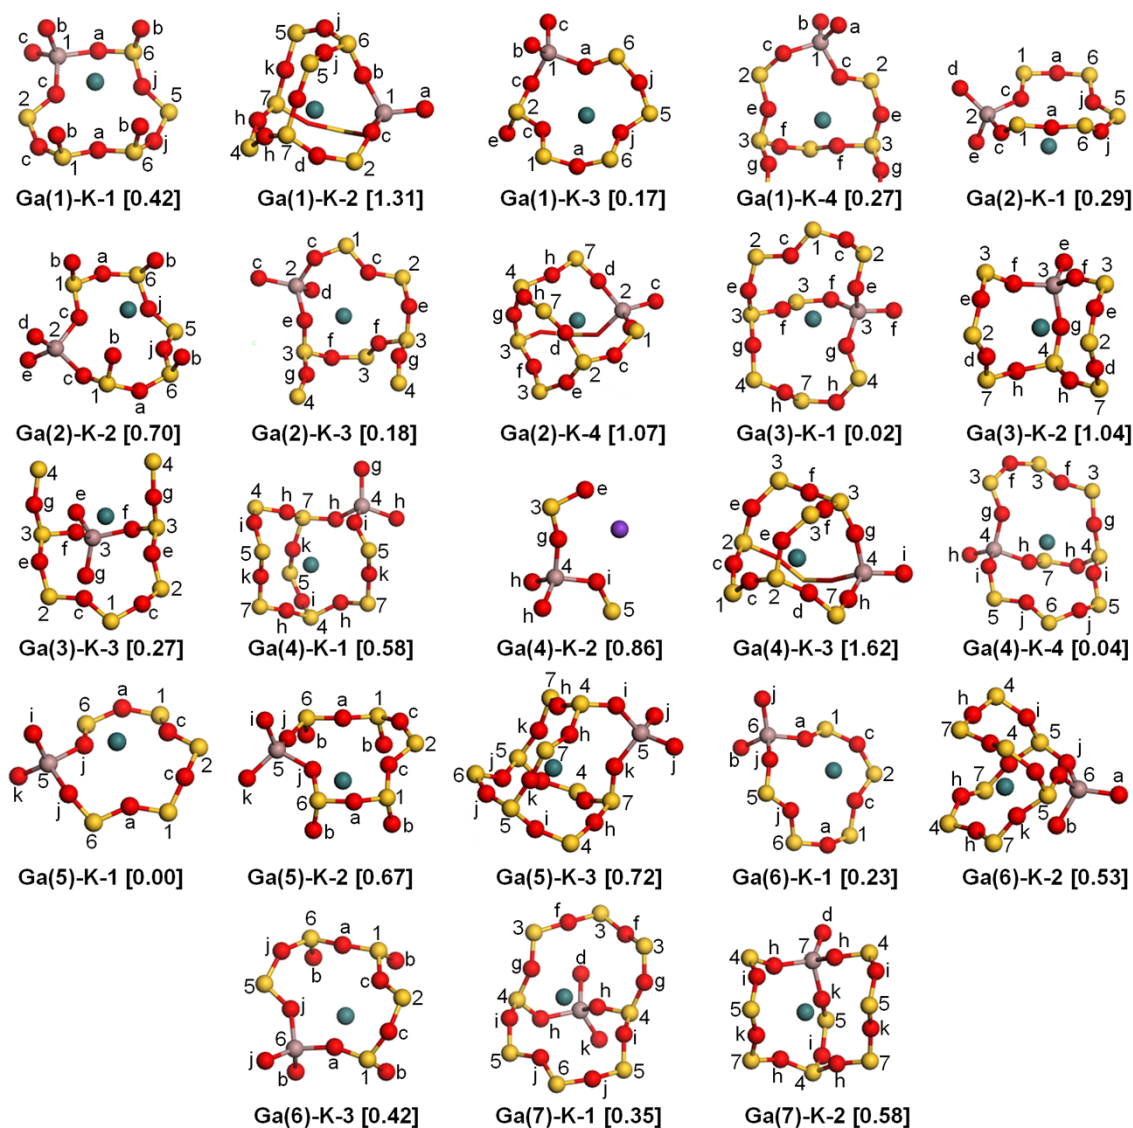

**Fig. S13.** Local structures and adsorption energies (eV) for the adsorption of NH<sub>3</sub> in HB-MTW zeolites. H, N, O, B and Si atoms are shown in white, blue, red, green and yellow, respectively (Only related atoms were selectively shown for good viewing).

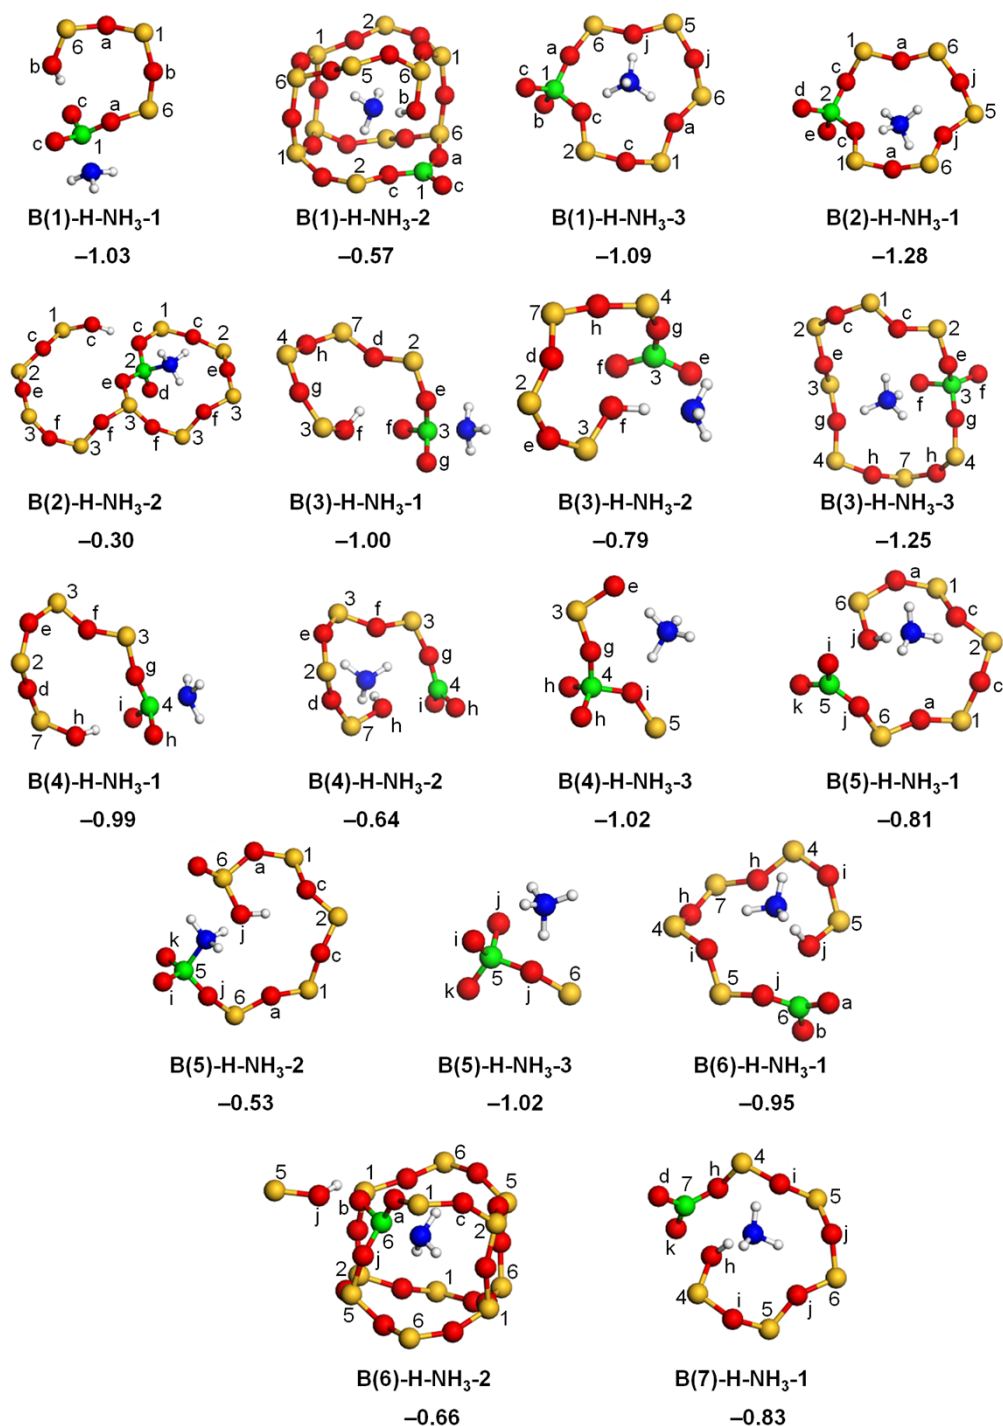

**Fig. S14.** Local structures and adsorption energies (eV) for the adsorption of pyridine in HB-MTW zeolites. H, C, N, O, B and Si atoms are shown in white, black, blue, red, green and yellow, respectively (Only related atoms were selectively shown for good viewing).

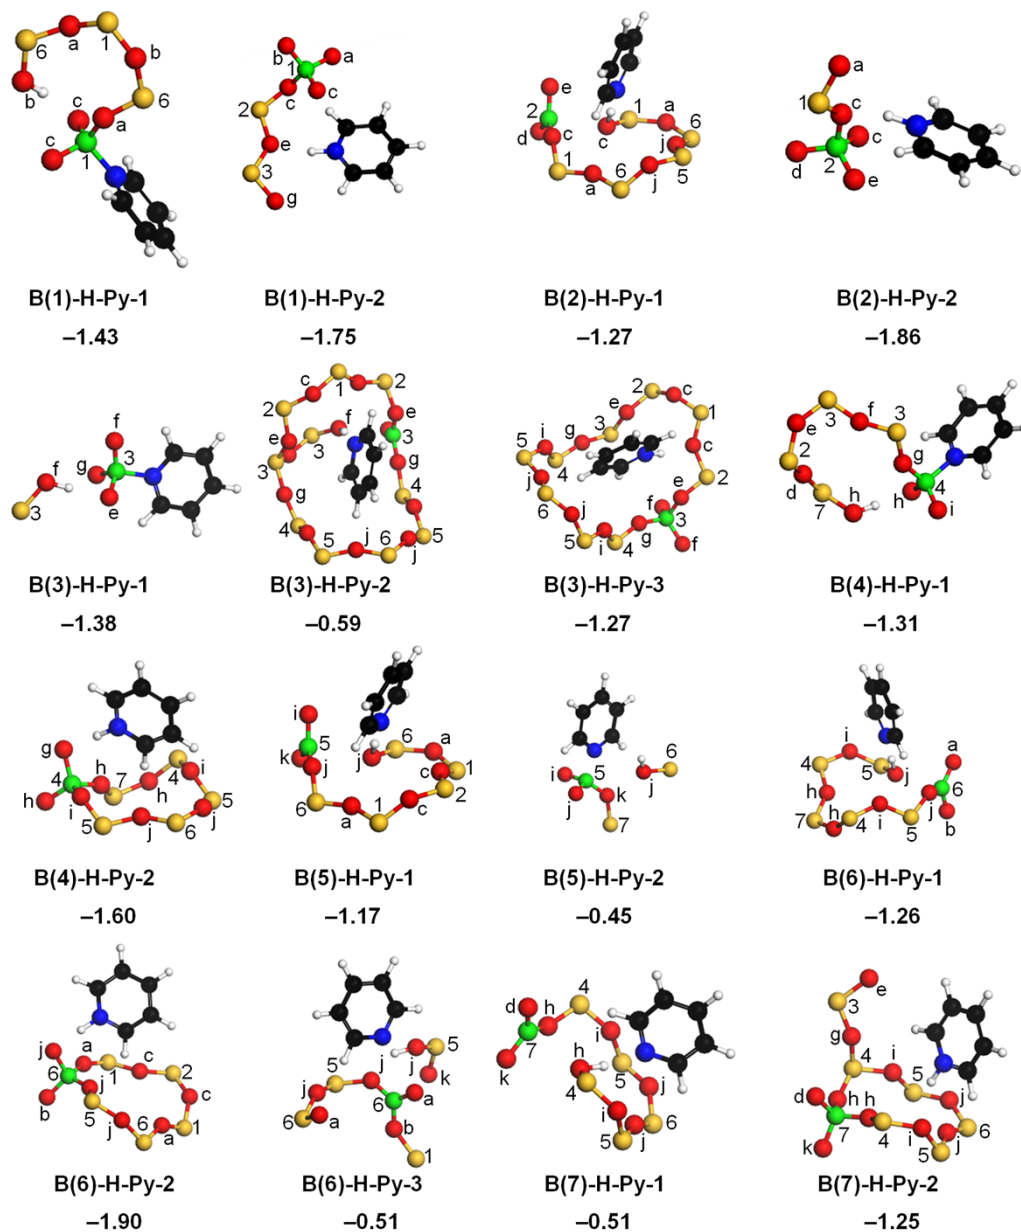

**Fig. S15.** Local structures and adsorption energies (eV) for the adsorption of NH<sub>3</sub> in HAl-MTW zeolites. H, N, O, Al and Si atoms are shown in white, blue, red, gray and yellow, respectively (Only related atoms were selectively shown for good viewing).

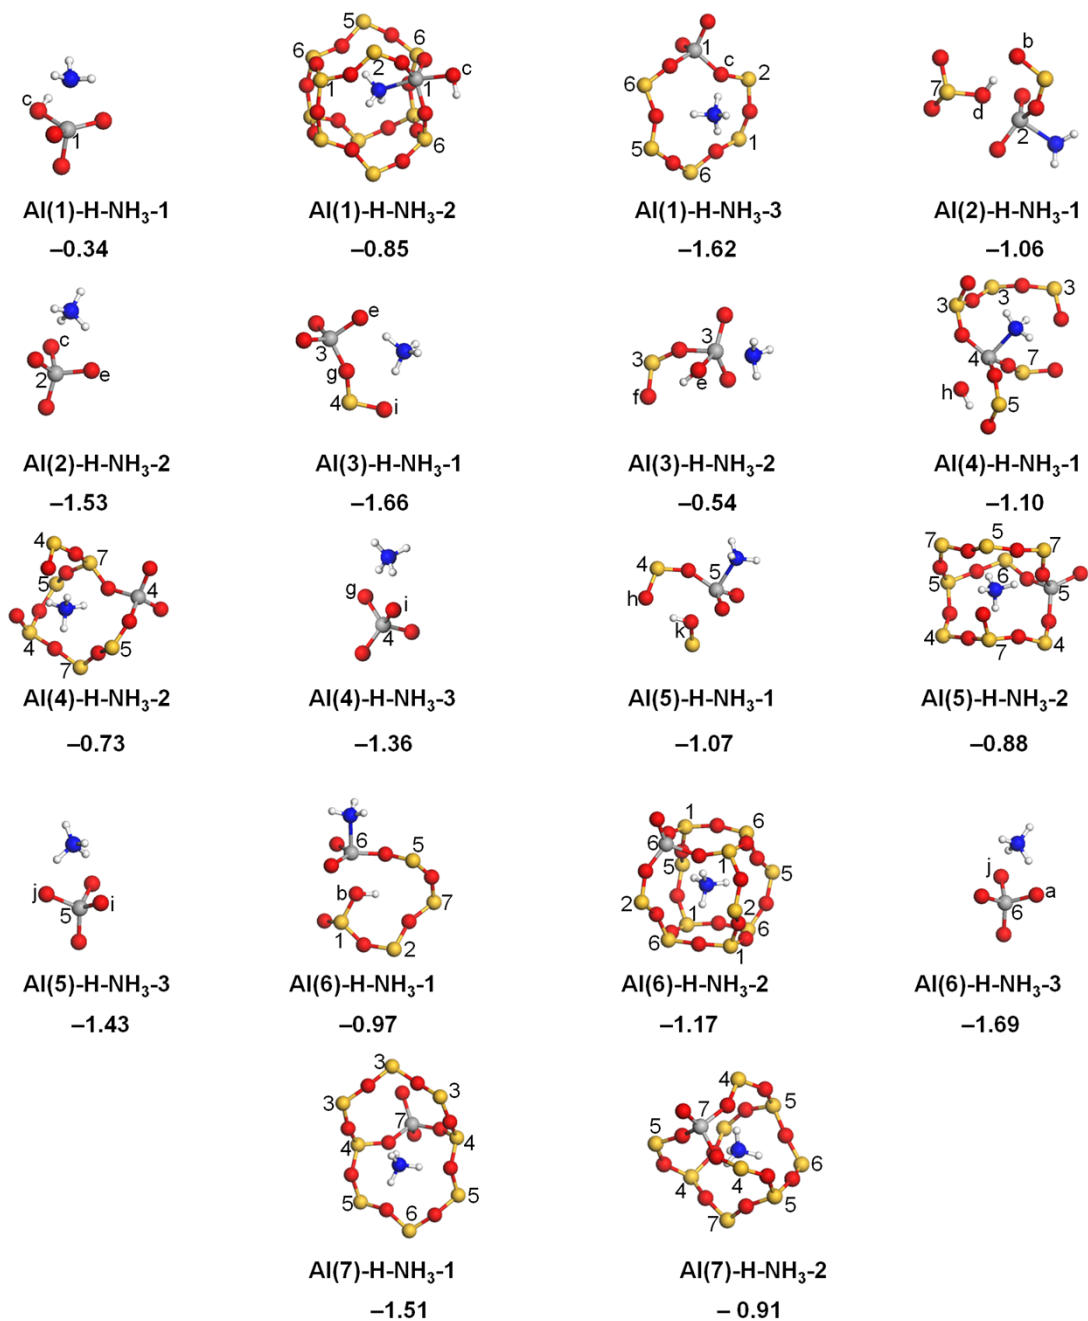

**Fig. S16.** Local structures and adsorption energies (eV) for the adsorption of pyridine in HAl-MTW zeolites. H, C, N, O, Al and Si atoms are shown in white, black, blue, red, gray and yellow, respectively (Only related atoms were selectively shown for good viewing).

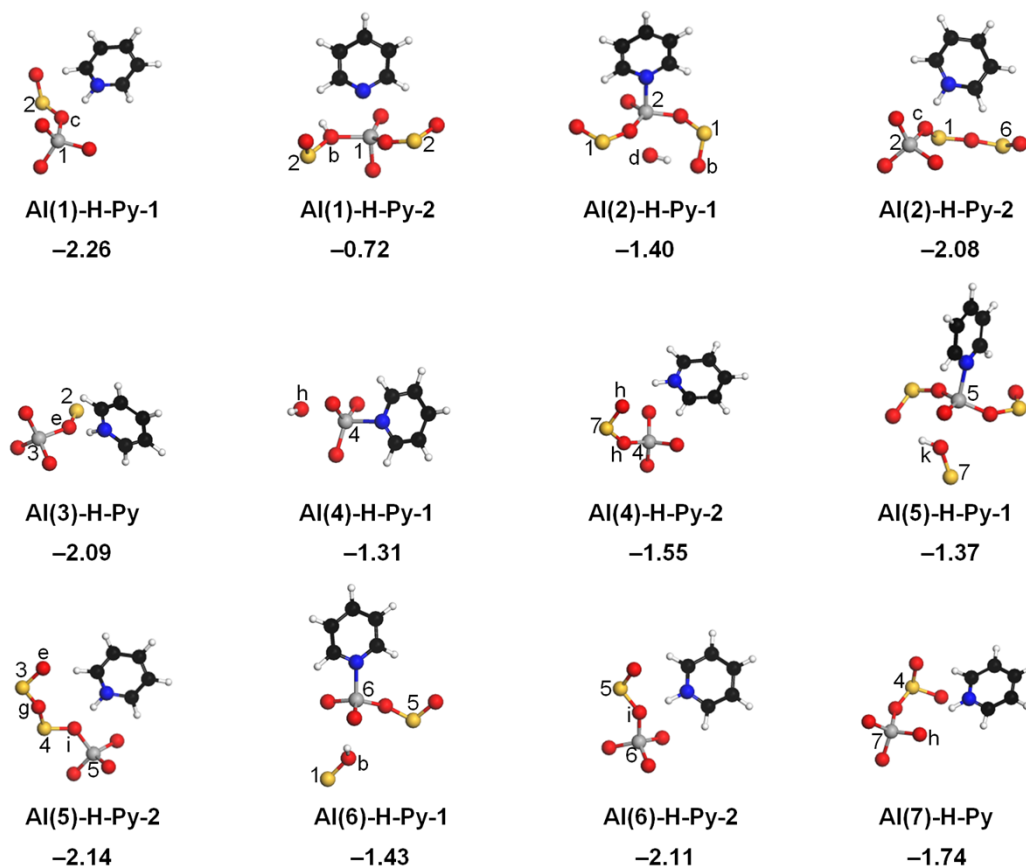

**Fig. S17.** Local structures and adsorption energies (eV) for the adsorption of NH<sub>3</sub> in HGa-MTW zeolites. H, N, O, Ga and Si atoms are shown in white, blue, red, tan and yellow, respectively (Only related atoms were selectively shown for good viewing).

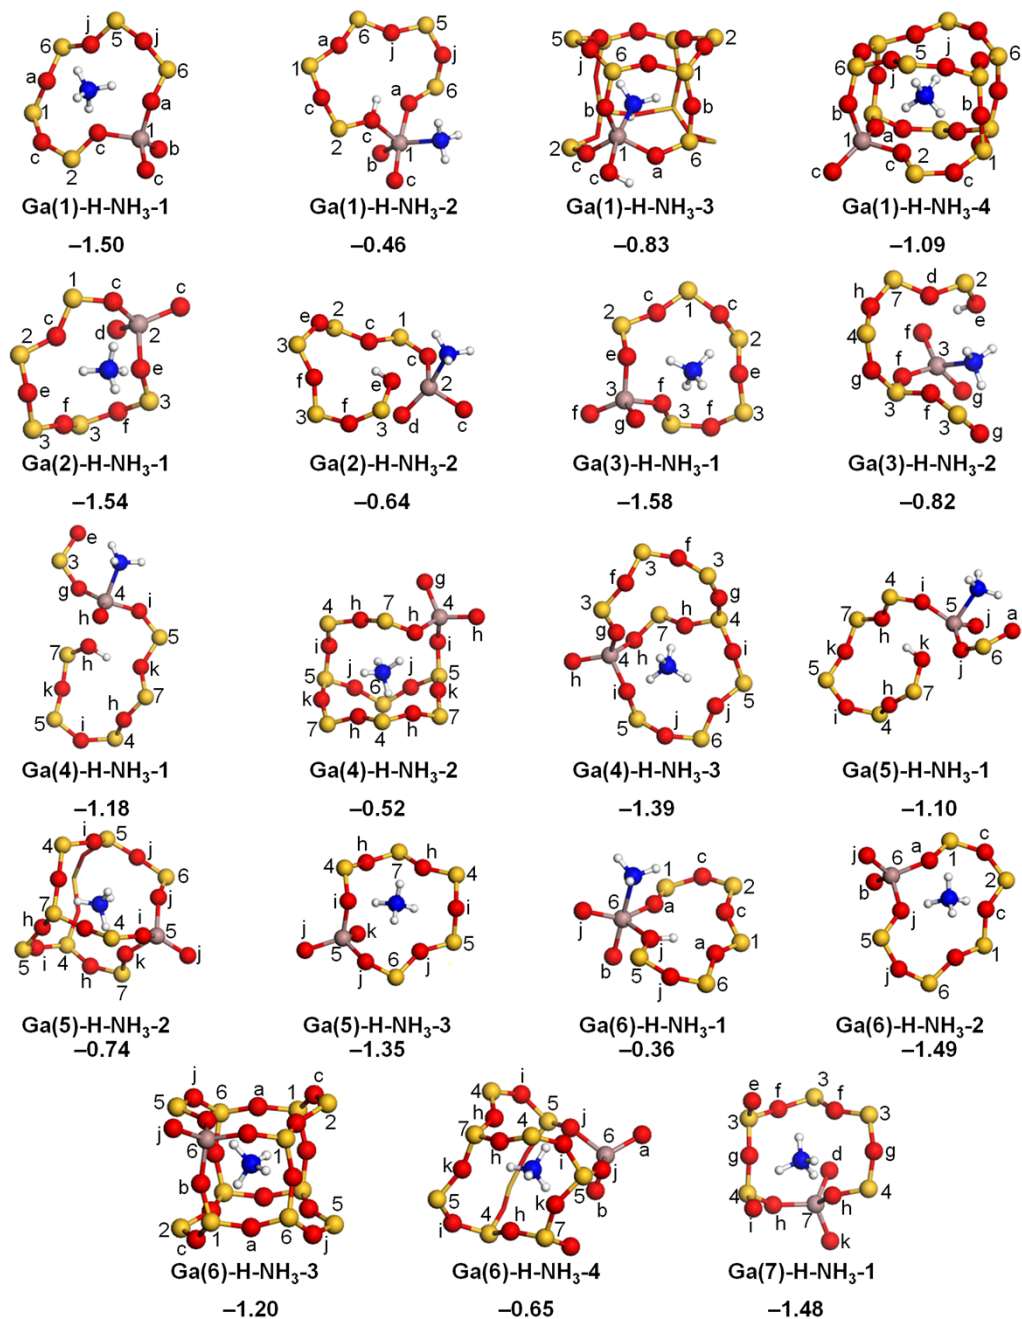



**Fig. S18.** Local structures and adsorption energies (eV) for the adsorption of pyridine in HGa-MTW zeolites. H, C, N, O, Ga and Si atoms are shown in white, black, blue, red, tan and yellow, respectively (Only related atoms were selectively shown for good viewing).

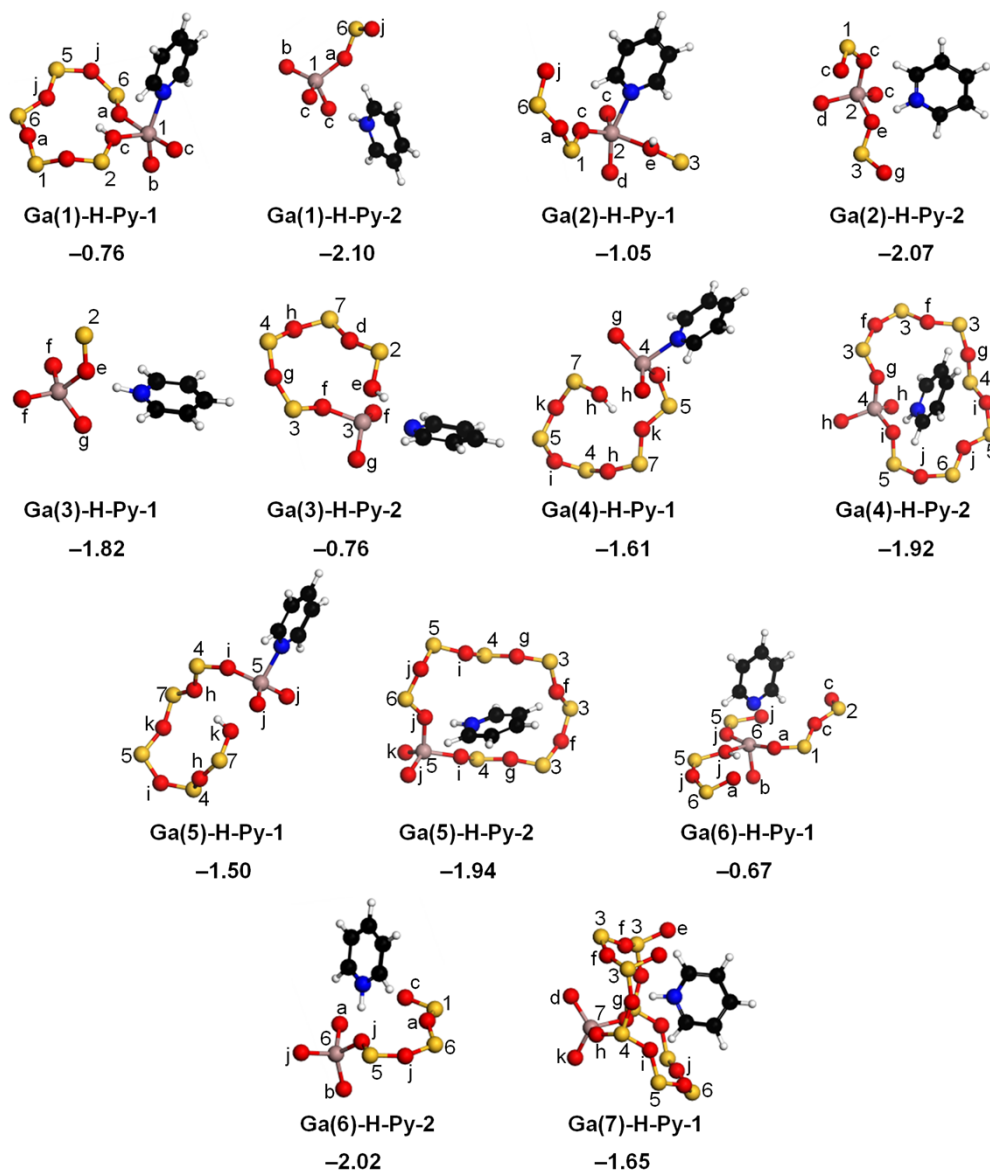

The  $p(1 \times 2 \times 1)$  cell parameters and the ionic positions of the optimized most stable structures for B, Al and Ga in each T site of the H form MTW zeolites.

### HB(1)-MTW

$$a = 25.4658 \text{ \AA}$$

$$b = 10.2546 \text{ \AA}$$

$$c = 12.2718 \text{ \AA}$$

$$\alpha = 89.1696^\circ$$

$$\beta = 109.167^\circ$$

$$\gamma = 90.4382^\circ$$

|   |            |            |            |
|---|------------|------------|------------|
| H | 0.37485830 | 0.30675411 | 0.92942085 |
| O | 0.10212694 | 0.39365452 | 0.25934465 |
| O | 0.07921254 | 0.14814830 | 0.89055126 |
| O | 0.23674063 | 0.40166816 | 0.82663879 |
| O | 0.57659623 | 0.08684266 | 0.22519855 |
| O | 0.57450500 | 0.39259337 | 0.87033896 |
| O | 0.73384079 | 0.14832543 | 0.81137939 |
| O | 0.89800714 | 0.40448652 | 0.73711895 |
| O | 0.90076648 | 0.07685585 | 0.13598032 |
| O | 0.76367373 | 0.41621985 | 0.17461110 |
| O | 0.39988716 | 0.16482641 | 0.72761277 |
| O | 0.40726034 | 0.34409724 | 0.16636496 |
| O | 0.24270892 | 0.09528238 | 0.14824204 |
| O | 0.92166457 | 0.15370098 | 0.77076872 |
| O | 0.91604961 | 0.32843671 | 0.11270391 |
| O | 0.73681348 | 0.16773379 | 0.14261034 |
| O | 0.42607749 | 0.39023125 | 0.76776090 |
| O | 0.42794160 | 0.09246548 | 0.14622437 |
| O | 0.26867842 | 0.34647925 | 0.17008298 |
| O | 0.09218492 | 0.14434550 | 0.21515195 |
| O | 0.09425954 | 0.39860069 | 0.86319599 |
| O | 0.26179782 | 0.15269658 | 0.86047890 |
| O | 0.60783819 | 0.33440260 | 0.23863324 |
| O | 0.59400867 | 0.14384299 | 0.84775894 |

|   |            |             |            |
|---|------------|-------------|------------|
| O | 0.76073222 | 0.39781949  | 0.84760016 |
| O | 0.00163752 | 0.00396058  | 0.14388235 |
| O | 0.08155429 | 0.96794378  | 0.05163126 |
| O | 0.34530024 | 0.98551596  | 0.58129479 |
| O | 0.32815965 | 0.01068910  | 0.78061873 |
| O | 0.34799553 | 0.00848416  | 0.22380618 |
| O | 0.33318973 | 0.99461109  | 0.00066231 |
| O | 0.28723776 | 0.00200973  | 0.36044716 |
| O | 0.50168230 | 0.27141255  | 0.13869133 |
| O | 0.57608920 | 0.21819588  | 0.03624752 |
| O | 0.84446732 | 0.23901031  | 0.57679476 |
| O | 0.82425098 | 0.23830238  | 0.77515703 |
| O | 0.84373749 | 0.24245686  | 0.21438577 |
| O | 0.82061140 | 0.21803746  | 0.98878583 |
| O | 0.78522533 | 0.25144140  | 0.35578537 |
| O | 0.99827970 | 0.97265134  | 0.85197642 |
| O | 0.91793614 | -0.00083475 | 0.94530546 |
| O | 0.65415299 | 0.00253236  | 0.41888410 |
| O | 0.67486020 | 0.00805913  | 0.22137800 |
| O | 0.65351462 | 0.97339352  | 0.77880896 |
| O | 0.67154797 | -0.00201495 | 0.00236823 |
| O | 0.71325224 | 0.97889517  | 0.63856151 |
| O | 0.49281339 | 0.21896121  | 0.83723826 |
| O | 0.40749242 | 0.25014229  | 0.96235172 |
| O | 0.15669367 | 0.22816120  | 0.42387414 |
| O | 0.18942965 | 0.25993380  | 0.24429785 |
| O | 0.15536949 | 0.22831240  | 0.79746227 |
| O | 0.17238310 | 0.26580740  | 0.01947300 |
| O | 0.20881883 | 0.23777793  | 0.64745742 |
| O | 0.23689806 | 0.40502801  | 0.50883537 |
| O | 0.76296991 | 0.41326239  | 0.50200412 |
| O | 0.73876666 | 0.16227379  | 0.50777471 |
| O | 0.26326318 | 0.15573794  | 0.51004014 |
| O | 0.09766450 | 0.89524095  | 0.26940176 |
| O | 0.08116726 | 0.65208217  | 0.87210072 |

|   |            |            |            |
|---|------------|------------|------------|
| O | 0.24662134 | 0.89758243 | 0.83439662 |
| O | 0.58020317 | 0.58417911 | 0.22843052 |
| O | 0.57719829 | 0.89299016 | 0.87137321 |
| O | 0.73396566 | 0.64732419 | 0.82691575 |
| O | 0.89346759 | 0.90642052 | 0.73448579 |
| O | 0.90444988 | 0.58016688 | 0.14131665 |
| O | 0.76087559 | 0.91643765 | 0.17133691 |
| O | 0.39815741 | 0.64414403 | 0.74705792 |
| O | 0.40629250 | 0.84014553 | 0.14711176 |
| O | 0.23884950 | 0.59277351 | 0.16054986 |
| O | 0.91527792 | 0.65630198 | 0.76935957 |
| O | 0.92236256 | 0.82900236 | 0.11522774 |
| O | 0.73980088 | 0.66560556 | 0.13146817 |
| O | 0.42114218 | 0.90287313 | 0.77123295 |
| O | 0.42102876 | 0.59084710 | 0.11781417 |
| O | 0.26393752 | 0.84385181 | 0.17866912 |
| O | 0.08346215 | 0.64441343 | 0.23420072 |
| O | 0.09968545 | 0.90240476 | 0.85812413 |
| O | 0.27012252 | 0.64693083 | 0.86139009 |
| O | 0.60354036 | 0.83571370 | 0.25929226 |
| O | 0.59643566 | 0.64222083 | 0.86073470 |
| O | 0.76007485 | 0.89894021 | 0.85505197 |
| O | 0.00122319 | 0.48298034 | 0.13860818 |
| O | 0.08454353 | 0.50274927 | 0.05353304 |
| O | 0.34374597 | 0.47892592 | 0.58605908 |
| O | 0.33060425 | 0.46759198 | 0.79159659 |
| O | 0.34632706 | 0.52748689 | 0.21995044 |
| O | 0.32800890 | 0.46243186 | 0.00153498 |
| O | 0.29031766 | 0.48226295 | 0.36458323 |
| O | 0.50258494 | 0.75946503 | 0.13454126 |
| O | 0.58729986 | 0.73529240 | 0.05368857 |
| O | 0.84082078 | 0.74147709 | 0.57060909 |
| O | 0.81596335 | 0.74189935 | 0.76198763 |
| O | 0.84492271 | 0.75342297 | 0.20775827 |
| O | 0.82782605 | 0.72168815 | 0.98488724 |

|    |            |            |            |
|----|------------|------------|------------|
| O  | 0.78555915 | 0.74389589 | 0.34751265 |
| O  | 0.99769210 | 0.49235396 | 0.86034980 |
| O  | 0.91440423 | 0.49965936 | 0.94525262 |
| O  | 0.65538535 | 0.48259234 | 0.41845806 |
| O  | 0.68113200 | 0.51898686 | 0.23004962 |
| O  | 0.65388802 | 0.47090131 | 0.78576243 |
| O  | 0.67039694 | 0.48529852 | 0.00963707 |
| O  | 0.70945291 | 0.49820195 | 0.63959461 |
| O  | 0.49817335 | 0.72461440 | 0.86637255 |
| O  | 0.41359247 | 0.75965396 | 0.94668992 |
| O  | 0.15721595 | 0.73067325 | 0.43141400 |
| O  | 0.17916370 | 0.75656829 | 0.23770982 |
| O  | 0.16380237 | 0.73014704 | 0.79885923 |
| O  | 0.17278997 | 0.75985843 | 0.01747665 |
| O  | 0.21882539 | 0.73674786 | 0.65179108 |
| O  | 0.23921067 | 0.90379897 | 0.50439615 |
| O  | 0.75884317 | 0.91291285 | 0.48192413 |
| O  | 0.73467037 | 0.66229402 | 0.49414038 |
| O  | 0.26345167 | 0.65338695 | 0.49821268 |
| Si | 0.06803739 | 0.00179466 | 0.16959782 |
| Si | 0.06444987 | 0.99796704 | 0.91282402 |
| Si | 0.37525558 | 0.01731277 | 0.71770678 |
| Si | 0.37878987 | 0.98455160 | 0.12879681 |
| Si | 0.29306526 | 0.01323111 | 0.86906353 |
| Si | 0.28545726 | 0.98762685 | 0.22871438 |
| Si | 0.28366636 | 0.01124320 | 0.48885127 |
| Si | 0.56523973 | 0.22804467 | 0.15932712 |
| Si | 0.55867257 | 0.24472434 | 0.89759141 |
| Si | 0.87210221 | 0.25857726 | 0.71544031 |
| Si | 0.87009736 | 0.21766864 | 0.11243569 |
| Si | 0.78521023 | 0.25083913 | 0.85577258 |
| Si | 0.78225172 | 0.26928838 | 0.22268385 |
| Si | 0.78261099 | 0.26641961 | 0.48472716 |
| Si | 0.93317894 | 0.00743069 | 0.82620157 |
| Si | 0.93575807 | 0.97736462 | 0.08477535 |

|    |            |            |            |
|----|------------|------------|------------|
| Si | 0.62704670 | 0.98387029 | 0.28037256 |
| Si | 0.62421107 | 0.00247886 | 0.87569119 |
| Si | 0.71053621 | 0.02195080 | 0.13399143 |
| Si | 0.71518680 | 0.00000828 | 0.77025860 |
| Si | 0.71652198 | 0.01391033 | 0.51198381 |
| Si | 0.43585968 | 0.24001073 | 0.10352273 |
| Si | 0.13466697 | 0.25563397 | 0.28507367 |
| Si | 0.12545595 | 0.25894875 | 0.89286546 |
| Si | 0.21804102 | 0.24140694 | 0.14488696 |
| Si | 0.21566012 | 0.25485469 | 0.78212347 |
| Si | 0.21664921 | 0.25634005 | 0.52273210 |
| Si | 0.43272029 | 0.75865750 | 0.83173937 |
| Si | 0.06741379 | 0.50519066 | 0.17062412 |
| Si | 0.06426776 | 0.51136840 | 0.91267407 |
| Si | 0.37541472 | 0.49480946 | 0.72364639 |
| Si | 0.37580151 | 0.48308885 | 0.12720043 |
| Si | 0.29090048 | 0.49684233 | 0.86923089 |
| Si | 0.28588438 | 0.48816660 | 0.23039218 |
| Si | 0.28330211 | 0.50449072 | 0.48912811 |
| Si | 0.56820684 | 0.72835779 | 0.16849985 |
| Si | 0.56470394 | 0.74883809 | 0.91288432 |
| Si | 0.86652263 | 0.76128160 | 0.70956952 |
| Si | 0.87447755 | 0.72185573 | 0.11213990 |
| Si | 0.78472315 | 0.75248866 | 0.85776979 |
| Si | 0.78264178 | 0.77021707 | 0.21515563 |
| Si | 0.77978963 | 0.76473959 | 0.47345976 |
| Si | 0.93149739 | 0.51320192 | 0.82850359 |
| Si | 0.93419626 | 0.47328278 | 0.08450792 |
| Si | 0.63066127 | 0.47990037 | 0.27824441 |
| Si | 0.62398907 | 0.49767470 | 0.88196534 |
| Si | 0.71328239 | 0.52148347 | 0.13545809 |
| Si | 0.71457197 | 0.50317498 | 0.77410495 |
| Si | 0.71589638 | 0.51407580 | 0.51358549 |
| Si | 0.43599433 | 0.73776631 | 0.08652569 |
| Si | 0.12919160 | 0.75544916 | 0.29285072 |

|    |            |            |            |
|----|------------|------------|------------|
| Si | 0.12968295 | 0.76042881 | 0.88673429 |
| Si | 0.21329085 | 0.73874600 | 0.14835025 |
| Si | 0.22480593 | 0.75372817 | 0.78605411 |
| Si | 0.21979431 | 0.75581978 | 0.52154329 |
| B  | 0.43911458 | 0.25819208 | 0.78027111 |

### HB(2)-MTW

$$a = 25.5108 \text{ \AA}$$

$$b = 10.2673 \text{ \AA}$$

$$c = 12.2215 \text{ \AA}$$

$$\alpha = 89.0924^\circ$$

$$\beta = 108.942^\circ$$

$$\gamma = 90.9529^\circ$$

|   |            |            |            |
|---|------------|------------|------------|
| H | 0.45029823 | 0.45060166 | 0.73806061 |
| O | 0.07958339 | 0.33944558 | 0.24481363 |
| O | 0.10225893 | 0.08220125 | 0.86887992 |
| O | 0.24309007 | 0.41362275 | 0.82017374 |
| O | 0.57967716 | 0.09047571 | 0.23372828 |
| O | 0.57710903 | 0.39204419 | 0.87378498 |
| O | 0.73601241 | 0.14492324 | 0.83443324 |
| O | 0.91338174 | 0.34099563 | 0.77400987 |
| O | 0.90049049 | 0.08490531 | 0.14096059 |
| O | 0.75895702 | 0.41998025 | 0.16727591 |
| O | 0.40057836 | 0.16950188 | 0.72786472 |
| O | 0.40170499 | 0.33934599 | 0.13157169 |
| O | 0.26374807 | 0.16736728 | 0.19276780 |
| O | 0.89409908 | 0.09136212 | 0.73538217 |
| O | 0.92413832 | 0.33473204 | 0.12540827 |
| O | 0.73923387 | 0.16763933 | 0.13418414 |
| O | 0.43347296 | 0.41528438 | 0.79426694 |
| O | 0.42100383 | 0.08933381 | 0.12014771 |
| O | 0.23989653 | 0.41671938 | 0.14984063 |
| O | 0.10367908 | 0.08797614 | 0.26509330 |
| O | 0.08135546 | 0.33198675 | 0.87425040 |

|   |            |            |            |
|---|------------|------------|------------|
| O | 0.26244980 | 0.16235982 | 0.86679423 |
| O | 0.60270725 | 0.34240188 | 0.26377326 |
| O | 0.60364444 | 0.14465713 | 0.87121911 |
| O | 0.75764598 | 0.39777698 | 0.85518859 |
| O | 0.00060447 | 0.01197848 | 0.15157263 |
| O | 0.07956281 | 0.99602573 | 0.05314362 |
| O | 0.34707889 | 0.99051183 | 0.57918888 |
| O | 0.32227019 | 0.02205037 | 0.76970216 |
| O | 0.34482501 | 0.00456373 | 0.21240375 |
| O | 0.32698482 | 0.97688556 | 0.98749452 |
| O | 0.28908648 | 0.98197019 | 0.35831084 |
| O | 0.50169322 | 0.26243954 | 0.13745854 |
| O | 0.58770807 | 0.23914035 | 0.05907782 |
| O | 0.84199157 | 0.25906229 | 0.57132636 |
| O | 0.81419157 | 0.24392572 | 0.75978231 |
| O | 0.84338787 | 0.26085930 | 0.20830816 |
| O | 0.83004044 | 0.23405341 | 0.98512847 |
| O | 0.78427266 | 0.25412858 | 0.34858402 |
| O | 0.99819723 | 0.02259930 | 0.85253278 |
| O | 0.91867783 | 0.00526246 | 0.95062758 |
| O | 0.65534532 | 0.99537621 | 0.42391427 |
| O | 0.67941613 | 0.02104649 | 0.23116874 |
| O | 0.65620507 | 0.96870399 | 0.78835681 |
| O | 0.67406632 | 0.97915761 | 0.01392374 |
| O | 0.71356672 | 0.99822588 | 0.64433185 |
| O | 0.50227451 | 0.20958543 | 0.86604874 |
| O | 0.41646037 | 0.24650573 | 0.94223560 |
| O | 0.15962591 | 0.24942133 | 0.42986689 |
| O | 0.17492177 | 0.26206145 | 0.22692497 |
| O | 0.15862869 | 0.25157993 | 0.78675537 |
| O | 0.17742250 | 0.23826652 | 0.01268768 |
| O | 0.21949296 | 0.24191916 | 0.64932713 |
| O | 0.26470456 | 0.33828679 | 0.49700312 |
| O | 0.75813554 | 0.42171678 | 0.48386934 |
| O | 0.73708312 | 0.16978127 | 0.50110202 |



|   |            |            |            |
|---|------------|------------|------------|
| O | 0.24369345 | 0.08563613 | 0.50274502 |
| O | 0.07885911 | 0.83754489 | 0.22686518 |
| O | 0.09709708 | 0.58665381 | 0.87144034 |
| O | 0.23677108 | 0.91541879 | 0.81242028 |
| O | 0.57730957 | 0.59160433 | 0.22861993 |
| O | 0.57665284 | 0.89585616 | 0.87335956 |
| O | 0.73489831 | 0.64825121 | 0.82281131 |
| O | 0.91977005 | 0.84420006 | 0.78187522 |
| O | 0.90397708 | 0.58448160 | 0.14270544 |
| O | 0.76531689 | 0.92096995 | 0.18559862 |
| O | 0.39179922 | 0.67628882 | 0.72566834 |
| O | 0.40352337 | 0.83796162 | 0.14145372 |
| O | 0.26245869 | 0.66867740 | 0.17548064 |
| O | 0.90287952 | 0.59418176 | 0.73950586 |
| O | 0.91963156 | 0.83597490 | 0.11874981 |
| O | 0.73885159 | 0.67225473 | 0.14595779 |
| O | 0.41968362 | 0.91995679 | 0.78545034 |
| O | 0.42553659 | 0.58977381 | 0.12983259 |
| O | 0.23900038 | 0.91931485 | 0.13988838 |
| O | 0.10593417 | 0.59007728 | 0.25829114 |
| O | 0.07267530 | 0.83558800 | 0.87844717 |
| O | 0.25401397 | 0.66486443 | 0.86616117 |
| O | 0.60580304 | 0.84083018 | 0.24889611 |
| O | 0.59008557 | 0.64352679 | 0.84787906 |
| O | 0.76286238 | 0.89718669 | 0.85261152 |
| O | 0.00303881 | 0.51235156 | 0.14283349 |
| O | 0.08523125 | 0.47056894 | 0.05839669 |
| O | 0.33871487 | 0.53043579 | 0.58543923 |
| O | 0.31798806 | 0.55210897 | 0.76205293 |
| O | 0.34465829 | 0.50419224 | 0.20938613 |
| O | 0.33120407 | 0.50024315 | 0.98409866 |
| O | 0.29080624 | 0.51135186 | 0.36076328 |
| O | 0.50192790 | 0.77061486 | 0.13464963 |
| O | 0.58197047 | 0.72713395 | 0.04488514 |
| O | 0.84656444 | 0.76340446 | 0.58207171 |

|    |            |            |            |
|----|------------|------------|------------|
| O  | 0.82332441 | 0.73543826 | 0.77567045 |
| O  | 0.84561874 | 0.75055376 | 0.21745477 |
| O  | 0.82469305 | 0.72175796 | 0.99326843 |
| O  | 0.78828962 | 0.74917673 | 0.36129423 |
| O  | 0.99962572 | 0.49278162 | 0.86412354 |
| O  | 0.91625700 | 0.49818083 | 0.94912506 |
| O  | 0.65507725 | 0.51375052 | 0.42227902 |
| O  | 0.67544818 | 0.51263599 | 0.22458290 |
| O  | 0.65225090 | 0.47833503 | 0.78064260 |
| O  | 0.66981799 | 0.50851313 | 0.00411163 |
| O  | 0.71272062 | 0.48724201 | 0.64193746 |
| O  | 0.49375605 | 0.73116836 | 0.85304086 |
| O  | 0.41316815 | 0.74734813 | 0.94642710 |
| O  | 0.15283496 | 0.75953252 | 0.42510904 |
| O  | 0.18068279 | 0.76593366 | 0.23691358 |
| O  | 0.15075873 | 0.76190158 | 0.78938776 |
| O  | 0.16921490 | 0.74496401 | 0.01513573 |
| O  | 0.20788972 | 0.73413541 | 0.64695141 |
| O  | 0.26055871 | 0.83121216 | 0.50863908 |
| O  | 0.76149550 | 0.92156485 | 0.49345739 |
| O  | 0.74224342 | 0.67007677 | 0.51706698 |
| O  | 0.23117154 | 0.58209382 | 0.49437224 |
| Si | 0.43877147 | 0.26108624 | 0.83175000 |
| Si | 0.06552045 | 0.98397927 | 0.17386465 |
| Si | 0.06280863 | 0.98368324 | 0.91294590 |
| Si | 0.37273199 | 0.02443489 | 0.71599957 |
| Si | 0.37377653 | 0.97876836 | 0.11468085 |
| Si | 0.28755153 | 0.01907346 | 0.85972949 |
| Si | 0.28395611 | 0.01854198 | 0.22618285 |
| Si | 0.28473576 | 0.97324776 | 0.48702431 |
| Si | 0.56741843 | 0.23391453 | 0.17312263 |
| Si | 0.56778452 | 0.24595366 | 0.91785569 |
| Si | 0.86615486 | 0.23449614 | 0.71063957 |
| Si | 0.87427339 | 0.22962729 | 0.11482038 |
| Si | 0.78482562 | 0.25514725 | 0.85904669 |

|    |            |            |            |
|----|------------|------------|------------|
| Si | 0.78123238 | 0.27600184 | 0.21523094 |
| Si | 0.78027977 | 0.27562722 | 0.47633287 |
| Si | 0.93296501 | 0.99145582 | 0.83050293 |
| Si | 0.93496145 | 0.98391450 | 0.09041414 |
| Si | 0.62972619 | 0.98698598 | 0.28364350 |
| Si | 0.62778241 | 0.99745919 | 0.88696336 |
| Si | 0.71415931 | 0.02203091 | 0.14082916 |
| Si | 0.71727846 | 0.00181597 | 0.77865469 |
| Si | 0.71713444 | 0.02121176 | 0.51590920 |
| Si | 0.43545182 | 0.23457726 | 0.08320221 |
| Si | 0.12929359 | 0.23448250 | 0.29131981 |
| Si | 0.13012985 | 0.22703527 | 0.88650456 |
| Si | 0.21362633 | 0.27072210 | 0.14496835 |
| Si | 0.22115287 | 0.26769763 | 0.78031847 |
| Si | 0.22217482 | 0.22939219 | 0.52000854 |
| Si | 0.42940076 | 0.76853380 | 0.82865315 |
| Si | 0.06820621 | 0.47848444 | 0.17585421 |
| Si | 0.06568056 | 0.47034038 | 0.91723191 |
| Si | 0.37523685 | 0.48396099 | 0.11322366 |
| Si | 0.28741362 | 0.53293266 | 0.85837985 |
| Si | 0.28435555 | 0.52452849 | 0.22479247 |
| Si | 0.28117132 | 0.49022793 | 0.48453180 |
| Si | 0.56647447 | 0.73308057 | 0.16420457 |
| Si | 0.56038007 | 0.74975970 | 0.90480369 |
| Si | 0.87323360 | 0.73508777 | 0.72029798 |
| Si | 0.87344972 | 0.72447292 | 0.11768737 |
| Si | 0.78683334 | 0.75045390 | 0.86127889 |
| Si | 0.78443459 | 0.77309796 | 0.22775923 |
| Si | 0.78448591 | 0.77579323 | 0.48843322 |
| Si | 0.93318163 | 0.48180239 | 0.83209162 |
| Si | 0.93708988 | 0.48220823 | 0.09018344 |
| Si | 0.62753114 | 0.48996626 | 0.28409647 |
| Si | 0.62272994 | 0.50600597 | 0.87761111 |
| Si | 0.71039060 | 0.52818378 | 0.13534447 |
| Si | 0.71449124 | 0.50297691 | 0.77442581 |

|    |            |            |            |
|----|------------|------------|------------|
| Si | 0.71723563 | 0.52326661 | 0.51610298 |
| Si | 0.43613756 | 0.73581349 | 0.08770495 |
| Si | 0.12925825 | 0.73796969 | 0.28570703 |
| Si | 0.12244028 | 0.73335337 | 0.88886900 |
| Si | 0.21271833 | 0.77387208 | 0.14160718 |
| Si | 0.21258470 | 0.76913080 | 0.77846476 |
| Si | 0.21337092 | 0.72777770 | 0.51925743 |
| B  | 0.35008714 | 0.58371683 | 0.69420838 |

### HB(3)-MTW

$$a = 25.4897 \text{ \AA}$$

$$b = 10.2725 \text{ \AA}$$

$$c = 12.2365 \text{ \AA}$$

$$\alpha = 91.0242^\circ$$

$$\beta = 109.411^\circ$$

$$\gamma = 89.3336^\circ$$

|   |            |            |            |
|---|------------|------------|------------|
| H | 0.25245571 | 0.44840605 | 0.60605245 |
| O | 0.10488544 | 0.39759683 | 0.25066634 |
| O | 0.08046877 | 0.15007664 | 0.90039302 |
| O | 0.23344574 | 0.39142841 | 0.82650887 |
| O | 0.60445080 | 0.13402916 | 0.24806677 |
| O | 0.59636397 | 0.32933815 | 0.85473264 |
| O | 0.73357616 | 0.17353428 | 0.83328004 |
| O | 0.89637533 | 0.38950571 | 0.73434601 |
| O | 0.92560126 | 0.14652779 | 0.12368300 |
| O | 0.75845261 | 0.36413656 | 0.15041713 |
| O | 0.41948265 | 0.08324894 | 0.76933702 |
| O | 0.42447065 | 0.38751203 | 0.12797494 |
| O | 0.26400206 | 0.15465786 | 0.17197132 |
| O | 0.91838437 | 0.14195336 | 0.78170841 |
| O | 0.90473198 | 0.39710900 | 0.14156733 |
| O | 0.74999591 | 0.11199544 | 0.16195339 |
| O | 0.39032252 | 0.33269439 | 0.73361991 |
| O | 0.40098094 | 0.13881450 | 0.13321243 |

|   |            |            |            |
|---|------------|------------|------------|
| O | 0.24123887 | 0.40590389 | 0.19712088 |
| O | 0.07808185 | 0.14728137 | 0.23094980 |
| O | 0.09593219 | 0.39685150 | 0.86337603 |
| O | 0.26289231 | 0.14549804 | 0.86846821 |
| O | 0.57750380 | 0.38359994 | 0.23118201 |
| O | 0.56906793 | 0.08357572 | 0.86469458 |
| O | 0.76528109 | 0.42096410 | 0.84961649 |
| O | 0.00262976 | 0.96354241 | 0.15175888 |
| O | 0.08483925 | 0.98014441 | 0.06444651 |
| O | 0.34296687 | 0.00084257 | 0.57425741 |
| O | 0.32166703 | 0.99687092 | 0.77157294 |
| O | 0.34436253 | 0.97835926 | 0.21789205 |
| O | 0.33164190 | 0.96691800 | 0.99331635 |
| O | 0.28287566 | 0.99578353 | 0.35342292 |
| O | 0.50085199 | 0.20695897 | 0.13381285 |
| O | 0.58154251 | 0.24753754 | 0.04530854 |
| O | 0.84266432 | 0.21277468 | 0.57895906 |
| O | 0.81918555 | 0.23714260 | 0.77094697 |
| O | 0.84995644 | 0.22167002 | 0.21794904 |
| O | 0.82845365 | 0.24574670 | 0.99268136 |
| O | 0.79085670 | 0.24889009 | 0.35695807 |
| O | 0.00093526 | 0.97468614 | 0.86332181 |
| O | 0.91859082 | 0.97920535 | 0.95117924 |
| O | 0.65428778 | 0.97691056 | 0.42130126 |
| O | 0.68260144 | 0.96605704 | 0.23347378 |
| O | 0.65094720 | 0.00537299 | 0.78542765 |
| O | 0.66406879 | 0.99859585 | 0.00932001 |
| O | 0.70791409 | 0.02171191 | 0.64308476 |
| O | 0.49436750 | 0.26876702 | 0.85260005 |
| O | 0.41332374 | 0.23426566 | 0.94304473 |
| O | 0.15129067 | 0.23945047 | 0.42699999 |
| O | 0.17877395 | 0.21871885 | 0.23739578 |
| O | 0.15517238 | 0.21471127 | 0.80191413 |
| O | 0.17518707 | 0.26858117 | 0.02331956 |
| O | 0.20848459 | 0.21448914 | 0.65175674 |

|   |            |            |            |
|---|------------|------------|------------|
| O | 0.22937241 | 0.41102379 | 0.53014012 |
| O | 0.76626393 | 0.40043150 | 0.51027070 |
| O | 0.73455145 | 0.15290650 | 0.48442971 |
| O | 0.25733843 | 0.16393366 | 0.49610340 |
| O | 0.10661489 | 0.89969397 | 0.27848104 |
| O | 0.07589723 | 0.65022053 | 0.85936416 |
| O | 0.23907839 | 0.89557660 | 0.82745108 |
| O | 0.60711777 | 0.63175484 | 0.25380795 |
| O | 0.59481557 | 0.83422756 | 0.85949386 |
| O | 0.73360541 | 0.66893533 | 0.82821335 |
| O | 0.89989435 | 0.89222389 | 0.73712334 |
| O | 0.92161059 | 0.64839285 | 0.11992257 |
| O | 0.75058331 | 0.85873510 | 0.13415315 |
| O | 0.41081558 | 0.58146123 | 0.79098214 |
| O | 0.42628379 | 0.88716294 | 0.14737728 |
| O | 0.26447857 | 0.65271787 | 0.16826781 |
| O | 0.91056358 | 0.64159571 | 0.77623381 |
| O | 0.90053817 | 0.89861167 | 0.14019576 |
| O | 0.74378074 | 0.61344263 | 0.17801393 |
| O | 0.39497187 | 0.83102750 | 0.73320446 |
| O | 0.39982437 | 0.63835104 | 0.12235223 |
| O | 0.23803709 | 0.90439504 | 0.13886156 |
| O | 0.08347673 | 0.65043122 | 0.23345351 |
| O | 0.10206576 | 0.90058885 | 0.87209945 |
| O | 0.25801206 | 0.64311049 | 0.85736779 |
| O | 0.58248114 | 0.88245920 | 0.22361795 |
| O | 0.57858013 | 0.58147011 | 0.86071911 |
| O | 0.75684555 | 0.92156751 | 0.85175667 |
| O | 0.00295786 | 0.48012559 | 0.14161156 |
| O | 0.08222472 | 0.51271722 | 0.04729585 |
| O | 0.34873797 | 0.51003453 | 0.57466988 |
| O | 0.30791060 | 0.48718601 | 0.74538884 |
| O | 0.34231247 | 0.47290494 | 0.20016622 |
| O | 0.33141856 | 0.47029343 | 0.97498410 |
| O | 0.30765077 | 0.53953513 | 0.37418472 |

|    |            |            |            |
|----|------------|------------|------------|
| O  | 0.50290946 | 0.70855583 | 0.14574067 |
| O  | 0.58070894 | 0.72875695 | 0.04431421 |
| O  | 0.84166591 | 0.72725838 | 0.57393614 |
| O  | 0.81471472 | 0.75944286 | 0.76184414 |
| O  | 0.84325331 | 0.72001968 | 0.20809589 |
| O  | 0.82681827 | 0.74988153 | 0.98472775 |
| O  | 0.78918156 | 0.77664123 | 0.35315956 |
| O  | 0.99625401 | 0.48333009 | 0.85262837 |
| O  | 0.91585216 | 0.47975468 | 0.94729488 |
| O  | 0.65853690 | 0.46872416 | 0.42096309 |
| O  | 0.67574263 | 0.44596197 | 0.22048496 |
| O  | 0.65692888 | 0.48611484 | 0.77903576 |
| O  | 0.67228017 | 0.48437492 | 0.00368357 |
| O  | 0.71531693 | 0.51898779 | 0.64024665 |
| O  | 0.49594235 | 0.74346778 | 0.84628833 |
| O  | 0.42012146 | 0.76333215 | 0.95212307 |
| O  | 0.16659546 | 0.72078606 | 0.42256259 |
| O  | 0.17768729 | 0.74497798 | 0.21800581 |
| O  | 0.15371593 | 0.73431858 | 0.77382299 |
| O  | 0.17463054 | 0.72649854 | 0.99960905 |
| O  | 0.21997896 | 0.73262200 | 0.64511410 |
| O  | 0.23898966 | 0.91106803 | 0.50761222 |
| O  | 0.76030976 | 0.90143210 | 0.51580192 |
| O  | 0.73658895 | 0.64895528 | 0.47297618 |
| O  | 0.27697569 | 0.67129807 | 0.50565825 |
| Si | 0.42964627 | 0.22968759 | 0.82485747 |
| Si | 0.06791151 | 0.99825076 | 0.18161775 |
| Si | 0.06686622 | 0.00148576 | 0.92477407 |
| Si | 0.36993015 | 0.97841357 | 0.71281390 |
| Si | 0.37570390 | 0.99317549 | 0.12275049 |
| Si | 0.28928394 | 0.00098255 | 0.86558893 |
| Si | 0.28204584 | 0.00861224 | 0.22148170 |
| Si | 0.28008191 | 0.01846887 | 0.48241927 |
| Si | 0.56590331 | 0.24295577 | 0.16422645 |
| Si | 0.56012330 | 0.23202951 | 0.90421420 |

|    |            |            |            |
|----|------------|------------|------------|
| Si | 0.86955999 | 0.24491351 | 0.71726561 |
| Si | 0.87715239 | 0.25306196 | 0.11838504 |
| Si | 0.78689808 | 0.27037012 | 0.86251789 |
| Si | 0.78713918 | 0.23606652 | 0.22311671 |
| Si | 0.78321782 | 0.25324957 | 0.48254014 |
| Si | 0.93469525 | 0.99701605 | 0.83382656 |
| Si | 0.93705702 | 0.99704978 | 0.09199351 |
| Si | 0.63052928 | 0.98977367 | 0.28084193 |
| Si | 0.61996226 | 0.98022888 | 0.87955117 |
| Si | 0.71147074 | 0.98440774 | 0.13451959 |
| Si | 0.71251270 | 0.03015085 | 0.77787844 |
| Si | 0.71467650 | 0.01292494 | 0.51674686 |
| Si | 0.43504032 | 0.24212139 | 0.08453702 |
| Si | 0.12791878 | 0.25155608 | 0.28664697 |
| Si | 0.12662462 | 0.25692326 | 0.89811724 |
| Si | 0.21495004 | 0.26285463 | 0.15728949 |
| Si | 0.21498594 | 0.24144183 | 0.78630418 |
| Si | 0.21197577 | 0.25797880 | 0.52708729 |
| Si | 0.43075605 | 0.72981898 | 0.83077793 |
| Si | 0.06825033 | 0.51003352 | 0.16801679 |
| Si | 0.06236992 | 0.51124547 | 0.90595342 |
| Si | 0.36526543 | 0.47945185 | 0.71126477 |
| Si | 0.37404245 | 0.49304563 | 0.10673904 |
| Si | 0.28290850 | 0.49796299 | 0.85344490 |
| Si | 0.28856960 | 0.51803853 | 0.23573510 |
| Si | 0.56803930 | 0.73776162 | 0.16648577 |
| Si | 0.56247866 | 0.72206916 | 0.90318861 |
| Si | 0.86693063 | 0.75479176 | 0.71319549 |
| Si | 0.87291023 | 0.75446359 | 0.11320088 |
| Si | 0.78323258 | 0.77606589 | 0.85710931 |
| Si | 0.78183137 | 0.74109767 | 0.21945462 |
| Si | 0.78135561 | 0.76299949 | 0.47835743 |
| Si | 0.93007590 | 0.49851401 | 0.82795755 |
| Si | 0.93639617 | 0.50168415 | 0.08779037 |
| Si | 0.62950994 | 0.48328927 | 0.28143463 |



|    |            |            |            |
|----|------------|------------|------------|
| Si | 0.62634274 | 0.47055207 | 0.87527012 |
| Si | 0.71205931 | 0.47725534 | 0.13736857 |
| Si | 0.71795195 | 0.52293279 | 0.77394156 |
| Si | 0.71950528 | 0.50916775 | 0.51174694 |
| Si | 0.43758972 | 0.74874502 | 0.09229169 |
| Si | 0.13356531 | 0.75388645 | 0.28767481 |
| Si | 0.12627743 | 0.75301370 | 0.87623457 |
| Si | 0.21351606 | 0.75771256 | 0.13152048 |
| Si | 0.21739335 | 0.75229795 | 0.77450390 |
| Si | 0.22599026 | 0.75794411 | 0.51959460 |
| B  | 0.30959449 | 0.57307107 | 0.48411926 |

#### HB(4)-MTW

$$a = 25.4057 \text{ \AA}$$

$$b = 10.2454 \text{ \AA}$$

$$c = 12.2566 \text{ \AA}$$

$$\alpha = 90.8822^\circ$$

$$\beta = 108.881^\circ$$

$$\gamma = 89.9739^\circ$$

|   |            |            |            |
|---|------------|------------|------------|
| H | 0.24418184 | 0.56364150 | 0.06355394 |
| O | 0.08336650 | 0.35693724 | 0.21355921 |
| O | 0.10152386 | 0.12300680 | 0.91151040 |
| O | 0.26013215 | 0.33687115 | 0.83432342 |
| O | 0.60209873 | 0.17149484 | 0.26490584 |
| O | 0.60093064 | 0.36045797 | 0.86833666 |
| O | 0.76111093 | 0.10666533 | 0.84390374 |
| O | 0.91996020 | 0.34670856 | 0.76367630 |
| O | 0.89804291 | 0.10828026 | 0.12708032 |
| O | 0.73592324 | 0.34708292 | 0.14556802 |
| O | 0.42525381 | 0.10161659 | 0.77661424 |
| O | 0.41634018 | 0.41174491 | 0.12318160 |
| O | 0.24063133 | 0.09119510 | 0.16672086 |
| O | 0.88860913 | 0.09738997 | 0.74651176 |
| O | 0.92070021 | 0.35986673 | 0.13869644 |

|   |            |            |            |
|---|------------|------------|------------|
| O | 0.76129822 | 0.09697558 | 0.18172367 |
| O | 0.39691907 | 0.35014171 | 0.73794531 |
| O | 0.40230498 | 0.15899133 | 0.13177966 |
| O | 0.28077316 | 0.33219027 | 0.18930072 |
| O | 0.10987288 | 0.10663672 | 0.22019165 |
| O | 0.08993733 | 0.37463894 | 0.89280088 |
| O | 0.23531941 | 0.08534596 | 0.82711881 |
| O | 0.58430924 | 0.42415606 | 0.22926402 |
| O | 0.57834631 | 0.10984543 | 0.87673427 |
| O | 0.73362080 | 0.35800254 | 0.83264295 |
| O | 0.00336593 | 0.04246668 | 0.15900244 |
| O | 0.06542174 | 0.95548520 | 0.03366799 |
| O | 0.34736506 | 0.03456233 | 0.57970770 |
| O | 0.32537313 | 0.02710321 | 0.77656528 |
| O | 0.34530785 | 0.00252858 | 0.21664215 |
| O | 0.32478220 | 0.99862120 | 0.99096180 |
| O | 0.29127511 | 0.96784158 | 0.36313931 |
| O | 0.50163632 | 0.25530997 | 0.14460613 |
| O | 0.58477505 | 0.26623691 | 0.05612043 |
| O | 0.83895632 | 0.25780326 | 0.57857954 |
| O | 0.82114015 | 0.28393715 | 0.77798468 |
| O | 0.84264344 | 0.27027899 | 0.22014752 |
| O | 0.82370420 | 0.27391528 | 0.99584410 |
| O | 0.78263863 | 0.26634531 | 0.35874726 |
| O | 0.99585612 | 0.04124631 | 0.83654626 |
| O | 0.92575560 | 0.00085719 | 0.95550478 |
| O | 0.65184169 | 0.99443736 | 0.41844259 |
| O | 0.67236418 | 0.00071054 | 0.22181574 |
| O | 0.65453196 | 0.03017737 | 0.78389839 |
| O | 0.67516175 | 0.01412899 | 0.00824055 |
| O | 0.71018297 | 0.00102457 | 0.63825075 |
| O | 0.50026968 | 0.28681224 | 0.86120679 |
| O | 0.41731775 | 0.25804285 | 0.94704578 |
| O | 0.15022359 | 0.25573102 | 0.41061279 |
| O | 0.18722755 | 0.28494707 | 0.23548220 |

|   |            |            |            |
|---|------------|------------|------------|
| O | 0.15480293 | 0.25689651 | 0.79265122 |
| O | 0.18819963 | 0.27376696 | 0.01961303 |
| O | 0.20296261 | 0.22412340 | 0.63329710 |
| O | 0.24655094 | 0.37992660 | 0.51463627 |
| O | 0.73291692 | 0.33660146 | 0.50944618 |
| O | 0.75630626 | 0.08730247 | 0.48721803 |
| O | 0.24461406 | 0.12392006 | 0.47713930 |
| O | 0.07997843 | 0.86059977 | 0.23858034 |
| O | 0.09582586 | 0.62700546 | 0.86412976 |
| O | 0.26493181 | 0.83715474 | 0.82660802 |
| O | 0.60338681 | 0.67719026 | 0.26074343 |
| O | 0.59857514 | 0.85879661 | 0.86392272 |
| O | 0.76323372 | 0.60635213 | 0.86037994 |
| O | 0.92060495 | 0.85065970 | 0.77364548 |
| O | 0.89822645 | 0.61110935 | 0.11814322 |
| O | 0.73892177 | 0.84447398 | 0.15286021 |
| O | 0.42063993 | 0.60347668 | 0.77225981 |
| O | 0.42154782 | 0.90816821 | 0.12805750 |
| O | 0.22279645 | 0.59114374 | 0.11444974 |
| O | 0.89618704 | 0.59861240 | 0.74815995 |
| O | 0.92656705 | 0.86015533 | 0.13694672 |
| O | 0.76722729 | 0.59602784 | 0.16941103 |
| O | 0.39440503 | 0.85285637 | 0.73353707 |
| O | 0.39446484 | 0.66016099 | 0.12531414 |
| O | 0.26131543 | 0.83685345 | 0.16424339 |
| O | 0.10225105 | 0.60707510 | 0.27339142 |
| O | 0.07747550 | 0.88080628 | 0.83451820 |
| O | 0.23532076 | 0.59009243 | 0.83394753 |
| O | 0.57219853 | 0.92307702 | 0.22227423 |
| O | 0.57457165 | 0.60943823 | 0.87488621 |
| O | 0.73524845 | 0.85597429 | 0.82823454 |
| O | 0.00106255 | 0.52749510 | 0.15196309 |
| O | 0.08043096 | 0.53773296 | 0.05481544 |
| O | 0.33823040 | 0.52038383 | 0.58998364 |
| O | 0.32988846 | 0.51324729 | 0.80307185 |

|    |            |            |            |
|----|------------|------------|------------|
| O  | 0.34847984 | 0.50257580 | 0.23737791 |
| O  | 0.31336540 | 0.49538104 | 0.00849711 |
| O  | 0.29950938 | 0.45247208 | 0.36809860 |
| O  | 0.49840594 | 0.73030572 | 0.13968887 |
| O  | 0.58021497 | 0.77152570 | 0.05097304 |
| O  | 0.84481313 | 0.76068394 | 0.58062319 |
| O  | 0.82090363 | 0.76841803 | 0.77288466 |
| O  | 0.84662928 | 0.77648525 | 0.21668027 |
| O  | 0.82796110 | 0.78832674 | 0.99272620 |
| O  | 0.79029457 | 0.74575479 | 0.35952776 |
| O  | 0.99981616 | 0.52042444 | 0.85190841 |
| O  | 0.92166854 | 0.48392204 | 0.95044389 |
| O  | 0.65615172 | 0.51818253 | 0.42697877 |
| O  | 0.68348806 | 0.52079177 | 0.23790161 |
| O  | 0.65537053 | 0.53820003 | 0.79171528 |
| O  | 0.67088829 | 0.52564612 | 0.01531538 |
| O  | 0.71240753 | 0.51475135 | 0.64875678 |
| O  | 0.49678854 | 0.78767420 | 0.85429703 |
| O  | 0.41467451 | 0.75977865 | 0.94398163 |
| O  | 0.16174255 | 0.78566391 | 0.41915423 |
| O  | 0.17122108 | 0.76050286 | 0.20914807 |
| O  | 0.15707265 | 0.76892626 | 0.77030256 |
| O  | 0.16947554 | 0.79824829 | 0.99302689 |
| O  | 0.21451788 | 0.70255156 | 0.63176474 |
| O  | 0.26241465 | 0.87413917 | 0.53694133 |
| O  | 0.73746325 | 0.83369426 | 0.49900142 |
| O  | 0.76440791 | 0.58346310 | 0.50242421 |
| O  | 0.24668485 | 0.62781856 | 0.45356538 |
| Si | 0.43524338 | 0.24898890 | 0.83095106 |
| Si | 0.06481857 | 0.99235119 | 0.16306833 |
| Si | 0.06018861 | 0.00135701 | 0.90374076 |
| Si | 0.37329091 | 0.00315998 | 0.71669090 |
| Si | 0.37316002 | 0.01630618 | 0.11546416 |
| Si | 0.28792184 | 0.98604726 | 0.85592990 |
| Si | 0.28415080 | 0.97574730 | 0.22739057 |

|    |            |            |            |
|----|------------|------------|------------|
| Si | 0.28594624 | 0.00072132 | 0.48807910 |
| Si | 0.56783706 | 0.27918875 | 0.17337286 |
| Si | 0.56608566 | 0.25565269 | 0.91566576 |
| Si | 0.86755605 | 0.24634382 | 0.71725674 |
| Si | 0.87133739 | 0.25295123 | 0.11986949 |
| Si | 0.78500054 | 0.25501149 | 0.86295008 |
| Si | 0.78050187 | 0.24498801 | 0.22664336 |
| Si | 0.77752317 | 0.23659805 | 0.48375059 |
| Si | 0.93304808 | 0.99758300 | 0.82862549 |
| Si | 0.93844684 | 0.00359180 | 0.09439929 |
| Si | 0.62439307 | 0.02200863 | 0.28136337 |
| Si | 0.62667705 | 0.00328146 | 0.88375848 |
| Si | 0.71164291 | 0.98899562 | 0.14106006 |
| Si | 0.71546793 | 0.99863146 | 0.77287134 |
| Si | 0.71424247 | 0.97925276 | 0.51065467 |
| Si | 0.43493706 | 0.27052292 | 0.08695899 |
| Si | 0.13193060 | 0.25127324 | 0.26997266 |
| Si | 0.13367180 | 0.25713570 | 0.90484946 |
| Si | 0.22395256 | 0.24505109 | 0.15321602 |
| Si | 0.21353880 | 0.22662317 | 0.77091937 |
| Si | 0.21143242 | 0.24625944 | 0.50949010 |
| Si | 0.43179366 | 0.75057043 | 0.82666483 |
| Si | 0.06676561 | 0.50617487 | 0.17303141 |
| Si | 0.06646675 | 0.51514212 | 0.91628644 |
| Si | 0.37087475 | 0.49624384 | 0.72521396 |
| Si | 0.36817773 | 0.51559193 | 0.12371569 |
| Si | 0.28518932 | 0.48265967 | 0.86849201 |
| Si | 0.28258662 | 0.49356001 | 0.47971296 |
| Si | 0.56295845 | 0.77513064 | 0.16806647 |
| Si | 0.56247097 | 0.75692881 | 0.91099718 |
| Si | 0.87110598 | 0.74431121 | 0.71964878 |
| Si | 0.87502952 | 0.75840928 | 0.11596548 |
| Si | 0.78698145 | 0.75429911 | 0.86394278 |
| Si | 0.78560669 | 0.74141626 | 0.22517540 |
| Si | 0.78399604 | 0.73119294 | 0.48535858 |

|    |            |            |            |
|----|------------|------------|------------|
| Si | 0.93477244 | 0.48815805 | 0.82909231 |
| Si | 0.93564158 | 0.49623707 | 0.08954623 |
| Si | 0.63160597 | 0.53409969 | 0.28779334 |
| Si | 0.62547765 | 0.50838186 | 0.88768103 |
| Si | 0.71420828 | 0.49687019 | 0.14162796 |
| Si | 0.71640148 | 0.50403647 | 0.78245896 |
| Si | 0.71671709 | 0.48866119 | 0.52174445 |
| Si | 0.43247777 | 0.76336576 | 0.08449752 |
| Si | 0.12893420 | 0.75295933 | 0.28386377 |
| Si | 0.12489093 | 0.76805881 | 0.86583560 |
| Si | 0.20591570 | 0.74488381 | 0.11966454 |
| Si | 0.21800153 | 0.72709330 | 0.76496995 |
| Si | 0.22169790 | 0.74712964 | 0.51090135 |
| B  | 0.30843826 | 0.43050501 | 0.26488812 |

### HB(5)-MTW

$$a = 25.4957 \text{ \AA}$$

$$b = 10.2729 \text{ \AA}$$

$$c = 12.2329 \text{ \AA}$$

$$\alpha = 89.022^\circ$$

$$\beta = 108.821^\circ$$

$$\gamma = 89.8669^\circ$$

|   |            |            |            |
|---|------------|------------|------------|
| H | 0.47145470 | 0.56459793 | 0.19264712 |
| O | 0.08032617 | 0.33960252 | 0.22342464 |
| O | 0.07963837 | 0.16190240 | 0.87557169 |
| O | 0.23823606 | 0.40248685 | 0.83389868 |
| O | 0.57897246 | 0.11836241 | 0.24228273 |
| O | 0.57328645 | 0.40555999 | 0.87355766 |
| O | 0.74303966 | 0.13697963 | 0.84265855 |
| O | 0.91473080 | 0.33811131 | 0.77665721 |
| O | 0.90310799 | 0.08629028 | 0.13971839 |
| O | 0.75812206 | 0.41676033 | 0.18390844 |
| O | 0.39596432 | 0.16002782 | 0.73577064 |
| O | 0.39361302 | 0.33624228 | 0.13401751 |

|   |            |             |            |
|---|------------|-------------|------------|
| O | 0.26422794 | 0.17052416  | 0.16975846 |
| O | 0.89493821 | 0.09144655  | 0.72857006 |
| O | 0.93014330 | 0.33452116  | 0.12532384 |
| O | 0.74680508 | 0.16506430  | 0.13064268 |
| O | 0.42165978 | 0.40867624  | 0.77720926 |
| O | 0.42249491 | 0.09052343  | 0.12593164 |
| O | 0.23206740 | 0.41787753  | 0.16662627 |
| O | 0.09385286 | 0.08686403  | 0.26134245 |
| O | 0.09966425 | 0.41046404  | 0.85505676 |
| O | 0.26268682 | 0.15362020  | 0.83574459 |
| O | 0.59172970 | 0.37296738  | 0.26031090 |
| O | 0.59925496 | 0.15575125  | 0.87822070 |
| O | 0.75672746 | 0.39159913  | 0.85614027 |
| O | 0.99747932 | 0.98650456  | 0.13576137 |
| O | 0.08140086 | 0.00106110  | 0.05130536 |
| O | 0.34505099 | -0.00434278 | 0.5752756  |
| O | 0.32656157 | 0.98263650  | 0.77614157 |
| O | 0.34700485 | 0.00254659  | 0.21982126 |
| O | 0.32700974 | 0.99552910  | 0.99388893 |
| O | 0.28506510 | 0.01574310  | 0.35635887 |
| O | 0.49499249 | 0.27916593  | 0.14021141 |
| O | 0.58053976 | 0.26027377  | 0.05982733 |
| O | 0.84376967 | 0.27205836  | 0.57101286 |
| O | 0.81466642 | 0.24506691  | 0.75605155 |
| O | 0.84708196 | 0.27291561  | 0.20346138 |
| O | 0.83630454 | 0.24124551  | 0.98248439 |
| O | 0.79252300 | 0.23352896  | 0.34937587 |
| O | 0.99654118 | 0.00712066  | 0.85523091 |
| O | 0.91262961 | 0.00362086  | 0.94101668 |
| O | 0.65790468 | 0.02327545  | 0.42562561 |
| O | 0.67890870 | 0.05998093  | 0.22935091 |
| O | 0.65475037 | 0.98985307  | 0.79018038 |
| O | 0.67282899 | -0.00949895 | 0.0164562  |
| O | 0.71347664 | 0.99823176  | 0.64776044 |
| O | 0.49728374 | 0.22578179  | 0.86506235 |

|   |            |            |            |
|---|------------|------------|------------|
| O | 0.41176281 | 0.24875207 | 0.94454865 |
| O | 0.15437624 | 0.24750930 | 0.41806433 |
| O | 0.17368911 | 0.22499232 | 0.21963681 |
| O | 0.15670005 | 0.23347714 | 0.78185761 |
| O | 0.17545477 | 0.25813057 | 0.00531219 |
| O | 0.21266438 | 0.27635130 | 0.63588490 |
| O | 0.25694801 | 0.34227163 | 0.47306785 |
| O | 0.73757538 | 0.35006908 | 0.47054909 |
| O | 0.76372171 | 0.09900389 | 0.50734229 |
| O | 0.24200374 | 0.09344128 | 0.51560059 |
| O | 0.08352251 | 0.83460923 | 0.22321248 |
| O | 0.07752912 | 0.65944645 | 0.87447412 |
| O | 0.23977328 | 0.90327623 | 0.83222961 |
| O | 0.57785900 | 0.62725707 | 0.24076377 |
| O | 0.57725618 | 0.90434620 | 0.87413219 |
| O | 0.73207196 | 0.63880229 | 0.80493382 |
| O | 0.91709678 | 0.84105076 | 0.77496032 |
| O | 0.90342789 | 0.58175494 | 0.14063828 |
| O | 0.75853849 | 0.91486036 | 0.19325812 |
| O | 0.39663894 | 0.65980118 | 0.73833422 |
| O | 0.40324031 | 0.83793567 | 0.13758412 |
| O | 0.26365637 | 0.66320203 | 0.16352102 |
| O | 0.90020866 | 0.59107157 | 0.73559916 |
| O | 0.91024884 | 0.83361410 | 0.10465792 |
| O | 0.73442843 | 0.66785810 | 0.13863696 |
| O | 0.42397155 | 0.90881577 | 0.76565470 |
| O | 0.44286588 | 0.59740453 | 0.12242373 |
| O | 0.24224461 | 0.91773569 | 0.14743454 |
| O | 0.10880989 | 0.58607618 | 0.25770534 |
| O | 0.09527519 | 0.90970403 | 0.86123380 |
| O | 0.26157111 | 0.65233850 | 0.85904015 |
| O | 0.61043214 | 0.87195771 | 0.24661116 |
| O | 0.59969550 | 0.65320522 | 0.86017605 |
| O | 0.75662125 | 0.88403571 | 0.85422051 |
| O | 0.00451884 | 0.52186260 | 0.14090638 |



|    |            |            |            |
|----|------------|------------|------------|
| O  | 0.08513413 | 0.49008431 | 0.04799698 |
| O  | 0.34358909 | 0.48802011 | 0.58416711 |
| O  | 0.32478677 | 0.49508660 | 0.78426293 |
| O  | 0.33902705 | 0.47259038 | 0.20540629 |
| O  | 0.32641338 | 0.47925624 | 0.00255901 |
| O  | 0.29273896 | 0.52826153 | 0.36197366 |
| O  | 0.50561933 | 0.81069329 | 0.13299247 |
| O  | 0.58648672 | 0.74115578 | 0.05106418 |
| O  | 0.84405844 | 0.76349190 | 0.57677136 |
| O  | 0.82081381 | 0.73892888 | 0.77051249 |
| O  | 0.83959036 | 0.74601429 | 0.20736378 |
| O  | 0.81979121 | 0.70109319 | 0.98505307 |
| O  | 0.78525622 | 0.73078376 | 0.35706951 |
| O  | 0.99949636 | 0.48929307 | 0.85360676 |
| O  | 0.91882855 | 0.50000675 | 0.94822613 |
| O  | 0.65598371 | 0.52431228 | 0.42160807 |
| O  | 0.66901647 | 0.51966792 | 0.21654397 |
| O  | 0.65042806 | 0.47135177 | 0.77919389 |
| O  | 0.67223964 | 0.48835875 | 0.00417940 |
| O  | 0.70868339 | 0.45965434 | 0.63780062 |
| O  | 0.49986713 | 0.72717107 | 0.85715285 |
| O  | 0.41820445 | 0.76324960 | 0.94510254 |
| O  | 0.15557646 | 0.75054175 | 0.42506770 |
| O  | 0.18534042 | 0.75553993 | 0.23900959 |
| O  | 0.15642906 | 0.74000596 | 0.79156229 |
| O  | 0.17006127 | 0.75747514 | 0.01449920 |
| O  | 0.21317195 | 0.75358210 | 0.64714938 |
| O  | 0.25876261 | 0.84210825 | 0.49324047 |
| O  | 0.73892430 | 0.84931698 | 0.49540850 |
| O  | 0.76124154 | 0.59739639 | 0.52121883 |
| O  | 0.24153724 | 0.58968520 | 0.51254342 |
| Si | 0.43184741 | 0.26139995 | 0.83097301 |
| Si | 0.06394591 | 0.97802235 | 0.16737448 |
| Si | 0.06310003 | 0.01884141 | 0.91092545 |
| Si | 0.37297910 | 0.01218355 | 0.71374941 |

|    |            |            |            |
|----|------------|------------|------------|
| Si | 0.37487638 | 0.98213255 | 0.11886997 |
| Si | 0.28945491 | 0.00860749 | 0.85964967 |
| Si | 0.28451210 | 0.02585160 | 0.22409200 |
| Si | 0.28234884 | 0.98705634 | 0.48448247 |
| Si | 0.56127853 | 0.25744142 | 0.17480232 |
| Si | 0.56235042 | 0.26160830 | 0.91891117 |
| Si | 0.86743271 | 0.23664141 | 0.70885902 |
| Si | 0.87904569 | 0.23432078 | 0.11317209 |
| Si | 0.78792368 | 0.25276392 | 0.85974910 |
| Si | 0.78568533 | 0.27271248 | 0.21675369 |
| Si | 0.78410431 | 0.23968291 | 0.47445940 |
| Si | 0.93063596 | 0.98666706 | 0.82523876 |
| Si | 0.93092999 | 0.97682379 | 0.08056454 |
| Si | 0.63135901 | 0.01829941 | 0.28565405 |
| Si | 0.62618651 | 0.01075297 | 0.88993728 |
| Si | 0.71406532 | 0.03188081 | 0.14191605 |
| Si | 0.71709858 | 0.00187685 | 0.78211517 |
| Si | 0.71881140 | 0.99292527 | 0.51985380 |
| Si | 0.43032018 | 0.23905175 | 0.08520790 |
| Si | 0.12558013 | 0.22560909 | 0.28031567 |
| Si | 0.12795591 | 0.26601609 | 0.87965471 |
| Si | 0.21105551 | 0.26896056 | 0.14042111 |
| Si | 0.21757775 | 0.26498769 | 0.77093028 |
| Si | 0.21681106 | 0.24002576 | 0.51087131 |
| Si | 0.43477518 | 0.76464037 | 0.82669123 |
| Si | 0.06950844 | 0.48532898 | 0.16725798 |
| Si | 0.06546430 | 0.51178058 | 0.90790067 |
| Si | 0.37157310 | 0.51329116 | 0.72150022 |
| Si | 0.28841932 | 0.50712378 | 0.87087556 |
| Si | 0.28180526 | 0.52051894 | 0.22416096 |
| Si | 0.28359772 | 0.48736352 | 0.48279414 |
| Si | 0.57001911 | 0.76442092 | 0.16751945 |
| Si | 0.56554646 | 0.75708361 | 0.91024481 |
| Si | 0.87071956 | 0.73366958 | 0.71516401 |
| Si | 0.86806326 | 0.71699426 | 0.10897874 |

|    |            |            |            |
|----|------------|------------|------------|
| Si | 0.78278723 | 0.73998720 | 0.85406629 |
| Si | 0.77930441 | 0.76520367 | 0.22397104 |
| Si | 0.78220255 | 0.73671702 | 0.48675208 |
| Si | 0.93351507 | 0.48077002 | 0.82896962 |
| Si | 0.93946736 | 0.48407554 | 0.08907611 |
| Si | 0.62396449 | 0.51053191 | 0.28408085 |
| Si | 0.62375686 | 0.50490645 | 0.87975928 |
| Si | 0.70828827 | 0.52288633 | 0.13544706 |
| Si | 0.71208234 | 0.49088960 | 0.76897221 |
| Si | 0.71627019 | 0.48336271 | 0.51294663 |
| Si | 0.44280603 | 0.75142457 | 0.08570511 |
| Si | 0.13303351 | 0.73222666 | 0.28558274 |
| Si | 0.12525428 | 0.76743482 | 0.88576836 |
| Si | 0.21530043 | 0.77374006 | 0.14081543 |
| Si | 0.21805186 | 0.76086563 | 0.78182740 |
| Si | 0.21752380 | 0.73483983 | 0.51983795 |
| B  | 0.35342260 | 0.43146369 | 0.11195728 |

### HB(6)-MTW

a = 25.5553 Å

b = 10.3285 Å

c = 12.3025 Å

$\alpha$  = 89.313°

$\beta$  = 108.932°

$\gamma$  = 90.3573°

|   |            |            |            |
|---|------------|------------|------------|
| H | 0.39242882 | 0.29652535 | 0.19519660 |
| O | 0.10289611 | 0.40961604 | 0.25851969 |
| O | 0.09836025 | 0.10929158 | 0.87952708 |
| O | 0.25873577 | 0.35855353 | 0.84253561 |
| O | 0.59327600 | 0.11695273 | 0.22118349 |
| O | 0.59407517 | 0.36100029 | 0.84946769 |
| O | 0.76349136 | 0.10496282 | 0.85136799 |
| O | 0.92188441 | 0.35142224 | 0.77030315 |
| O | 0.89519600 | 0.09951768 | 0.10891791 |

|   |            |            |            |
|---|------------|------------|------------|
| O | 0.76148038 | 0.40797143 | 0.17719286 |
| O | 0.41466445 | 0.11764724 | 0.74004493 |
| O | 0.38994271 | 0.34982408 | 0.12703769 |
| O | 0.24392135 | 0.11537665 | 0.14244590 |
| O | 0.89449154 | 0.10210579 | 0.75292346 |
| O | 0.92367106 | 0.34586103 | 0.12855261 |
| O | 0.74515091 | 0.15590458 | 0.15206817 |
| O | 0.39327862 | 0.35912050 | 0.78392934 |
| O | 0.42913506 | 0.09279924 | 0.13456826 |
| O | 0.26096351 | 0.36762717 | 0.16945010 |
| O | 0.08426388 | 0.15931900 | 0.22518231 |
| O | 0.07766622 | 0.36016465 | 0.85840293 |
| O | 0.24269208 | 0.10539538 | 0.83894424 |
| O | 0.58516405 | 0.36648247 | 0.24691805 |
| O | 0.57775341 | 0.11021652 | 0.87180634 |
| O | 0.73428081 | 0.35334286 | 0.82267204 |
| O | 0.99713987 | 0.01354127 | 0.14534234 |
| O | 0.07908087 | 0.99442298 | 0.05660059 |
| O | 0.34267314 | 0.99516706 | 0.56740414 |
| O | 0.32221604 | 0.01986572 | 0.76444138 |
| O | 0.34769746 | 0.02734084 | 0.21039171 |
| O | 0.33305837 | 0.00735760 | 0.98742982 |
| O | 0.28649367 | 0.00478010 | 0.34802054 |
| O | 0.49841176 | 0.23820040 | 0.11978451 |
| O | 0.58364533 | 0.27326835 | 0.04383576 |
| O | 0.84530359 | 0.26560569 | 0.58229551 |
| O | 0.82306399 | 0.27694287 | 0.77693698 |
| O | 0.84788270 | 0.25436886 | 0.21780167 |
| O | 0.82340750 | 0.28000457 | 0.99298321 |
| O | 0.79077899 | 0.25155567 | 0.36122592 |
| O | 0.99697566 | 0.02662661 | 0.85846751 |
| O | 0.91771158 | 0.96563846 | 0.94781271 |
| O | 0.65742567 | 0.02332526 | 0.42408706 |
| O | 0.68736017 | 0.99392687 | 0.24152874 |
| O | 0.65851915 | 0.02632460 | 0.79646369 |

|   |            |            |            |
|---|------------|------------|------------|
| O | 0.66841967 | 0.00659055 | 0.01722327 |
| O | 0.71052063 | 0.00730038 | 0.64608033 |
| O | 0.49643248 | 0.27504128 | 0.85213572 |
| O | 0.42338260 | 0.18219801 | 0.95054066 |
| O | 0.15575195 | 0.24409587 | 0.42195316 |
| O | 0.18174631 | 0.25692415 | 0.23176231 |
| O | 0.15640769 | 0.26167195 | 0.78683954 |
| O | 0.17132789 | 0.27824015 | 0.00975088 |
| O | 0.21254584 | 0.23819317 | 0.64282768 |
| O | 0.23871063 | 0.41018158 | 0.50825324 |
| O | 0.74005587 | 0.34569652 | 0.50025080 |
| O | 0.76379593 | 0.09564108 | 0.50789034 |
| O | 0.26004304 | 0.16143090 | 0.49128864 |
| O | 0.09333566 | 0.90637718 | 0.26710497 |
| O | 0.09982104 | 0.61105829 | 0.86530055 |
| O | 0.26231064 | 0.85331637 | 0.84261487 |
| O | 0.58479298 | 0.61791986 | 0.23493086 |
| O | 0.59581879 | 0.86043185 | 0.86325371 |
| O | 0.76112650 | 0.60183592 | 0.84326381 |
| O | 0.91921934 | 0.85318072 | 0.75678510 |
| O | 0.90534751 | 0.59707554 | 0.12990470 |
| O | 0.76171239 | 0.90288371 | 0.15618287 |
| O | 0.41674742 | 0.60760773 | 0.76723864 |
| O | 0.40090311 | 0.84506037 | 0.13549149 |
| O | 0.23725576 | 0.61588906 | 0.16951591 |
| O | 0.89622979 | 0.60102907 | 0.74037327 |
| O | 0.91767325 | 0.85079272 | 0.14341252 |
| O | 0.73511177 | 0.65602733 | 0.15391145 |
| O | 0.40140614 | 0.86162586 | 0.74668728 |
| O | 0.42194794 | 0.59557905 | 0.12710286 |
| O | 0.26416104 | 0.86350579 | 0.15740792 |
| O | 0.09172854 | 0.66003376 | 0.21181929 |
| O | 0.07628580 | 0.85858485 | 0.87225782 |
| O | 0.23176910 | 0.60767718 | 0.83084674 |
| O | 0.59852317 | 0.86782730 | 0.25918988 |

|    |            |            |            |
|----|------------|------------|------------|
| O  | 0.58202129 | 0.60885958 | 0.88144947 |
| O  | 0.74002765 | 0.85496912 | 0.83402608 |
| O  | 0.00458858 | 0.50961576 | 0.14320554 |
| O  | 0.08324253 | 0.49316362 | 0.04497445 |
| O  | 0.34428374 | 0.48942602 | 0.58874851 |
| O  | 0.31744061 | 0.53697695 | 0.77329624 |
| O  | 0.34252524 | 0.53634209 | 0.21645178 |
| O  | 0.32252393 | 0.52308313 | 0.99187323 |
| O  | 0.29061634 | 0.49723918 | 0.36692403 |
| O  | 0.50048340 | 0.77172175 | 0.13841808 |
| O  | 0.58506822 | 0.76414270 | 0.05579340 |
| O  | 0.84073083 | 0.76002571 | 0.57397123 |
| O  | 0.82388256 | 0.76917267 | 0.77446107 |
| O  | 0.84167205 | 0.72975823 | 0.21547695 |
| O  | 0.82778410 | 0.75514984 | 0.99317894 |
| O  | 0.78399836 | 0.77194550 | 0.35394104 |
| O  | 0.99932829 | 0.53007818 | 0.85092594 |
| O  | 0.92056486 | 0.49487610 | 0.94724278 |
| O  | 0.65351212 | 0.50093018 | 0.41783741 |
| O  | 0.67210458 | 0.48683659 | 0.21938346 |
| O  | 0.65529006 | 0.53032657 | 0.78276582 |
| O  | 0.67464744 | 0.48844723 | 0.00508314 |
| O  | 0.71072620 | 0.50735013 | 0.63672185 |
| O  | 0.49911481 | 0.76753032 | 0.86395741 |
| O  | 0.41511767 | 0.74861787 | 0.94729344 |
| O  | 0.15738210 | 0.73860413 | 0.41674257 |
| O  | 0.18085631 | 0.80334958 | 0.22916257 |
| O  | 0.15505227 | 0.78760383 | 0.78693505 |
| O  | 0.17192278 | 0.76822697 | 0.01034698 |
| O  | 0.20878171 | 0.75309216 | 0.63877829 |
| O  | 0.23828157 | 0.91008731 | 0.49535360 |
| O  | 0.73661628 | 0.84680297 | 0.50554251 |
| O  | 0.75633129 | 0.59800347 | 0.48565209 |
| O  | 0.26263859 | 0.65997116 | 0.50419971 |
| Si | 0.43260385 | 0.23482811 | 0.83220401 |

|    |            |            |            |
|----|------------|------------|------------|
| Si | 0.06336798 | 0.01772364 | 0.17330690 |
| Si | 0.06257835 | 0.99774317 | 0.91676086 |
| Si | 0.37048587 | 0.99858240 | 0.70632216 |
| Si | 0.37741222 | 0.99257026 | 0.11509642 |
| Si | 0.29047831 | 0.99625770 | 0.85835529 |
| Si | 0.28536241 | 0.00332951 | 0.21599421 |
| Si | 0.28129853 | 0.01722120 | 0.47492049 |
| Si | 0.56484945 | 0.24865336 | 0.15764609 |
| Si | 0.56287519 | 0.25432218 | 0.90438224 |
| Si | 0.87152740 | 0.24836841 | 0.72116815 |
| Si | 0.87265411 | 0.24479481 | 0.11185722 |
| Si | 0.78610915 | 0.25319315 | 0.86093251 |
| Si | 0.78606732 | 0.26699592 | 0.22761927 |
| Si | 0.78461623 | 0.24029002 | 0.48738187 |
| Si | 0.93232331 | 0.98710115 | 0.82928909 |
| Si | 0.93202498 | 0.98289384 | 0.08607509 |
| Si | 0.63385169 | 0.00113634 | 0.28573755 |
| Si | 0.62542133 | 0.00155556 | 0.88741198 |
| Si | 0.71552138 | 0.01509061 | 0.14142894 |
| Si | 0.71833922 | 0.99785603 | 0.78161071 |
| Si | 0.71739655 | 0.99347310 | 0.52090575 |
| Si | 0.13088104 | 0.26701114 | 0.28347394 |
| Si | 0.12608652 | 0.25155089 | 0.88408725 |
| Si | 0.21405849 | 0.25447399 | 0.13793374 |
| Si | 0.21788978 | 0.24203410 | 0.77731170 |
| Si | 0.21708742 | 0.26294321 | 0.51652343 |
| Si | 0.43314822 | 0.74592323 | 0.83157827 |
| Si | 0.07034757 | 0.51739416 | 0.16438907 |
| Si | 0.06492428 | 0.49902622 | 0.90492413 |
| Si | 0.36860398 | 0.49776371 | 0.72858863 |
| Si | 0.36934812 | 0.50050847 | 0.11649577 |
| Si | 0.28276848 | 0.50516474 | 0.86060439 |
| Si | 0.28247984 | 0.50555442 | 0.23118443 |
| Si | 0.28378395 | 0.51419957 | 0.49210429 |
| Si | 0.56684422 | 0.75578970 | 0.17131839 |

|    |            |            |            |
|----|------------|------------|------------|
| Si | 0.56543759 | 0.74988711 | 0.91611496 |
| Si | 0.87027225 | 0.74548059 | 0.71214478 |
| Si | 0.87296150 | 0.73306275 | 0.11960106 |
| Si | 0.78831961 | 0.74556371 | 0.86104480 |
| Si | 0.78049353 | 0.76387628 | 0.22066052 |
| Si | 0.77920571 | 0.74441781 | 0.47978960 |
| Si | 0.93474051 | 0.49436555 | 0.82732416 |
| Si | 0.93868255 | 0.48719223 | 0.08697837 |
| Si | 0.62422079 | 0.49373826 | 0.27942895 |
| Si | 0.62665197 | 0.49825045 | 0.88057641 |
| Si | 0.71048532 | 0.50961622 | 0.13859371 |
| Si | 0.71546044 | 0.49807078 | 0.77061400 |
| Si | 0.71554650 | 0.48815110 | 0.51033657 |
| Si | 0.43488253 | 0.73985557 | 0.08748216 |
| Si | 0.13059043 | 0.77628046 | 0.28108900 |
| Si | 0.12585145 | 0.75602983 | 0.88400115 |
| Si | 0.21330869 | 0.76188201 | 0.14099395 |
| Si | 0.21473233 | 0.75127424 | 0.77377587 |
| Si | 0.21728211 | 0.76502961 | 0.51452936 |
| B  | 0.44952926 | 0.17419257 | 0.06787952 |

### HB(7)-MTW

a = 25.6237 Å

b = 10.2525 Å

c = 12.1779 Å

$\alpha$  = 89.6242°

$\beta$  = 109.039°

$\gamma$  = 90.5725°

|   |            |            |            |
|---|------------|------------|------------|
| H | 0.31068563 | 0.21208700 | 0.19359342 |
| O | 0.07644743 | 0.35516514 | 0.23143695 |
| O | 0.07782602 | 0.14836061 | 0.87236958 |
| O | 0.24037190 | 0.40175852 | 0.80933209 |
| O | 0.60197945 | 0.13682271 | 0.26778212 |
| O | 0.60116017 | 0.35186436 | 0.88493759 |



|   |            |            |            |
|---|------------|------------|------------|
| O | 0.75856876 | 0.10278358 | 0.86333806 |
| O | 0.89586526 | 0.39895832 | 0.72707640 |
| O | 0.89993196 | 0.10498134 | 0.11590236 |
| O | 0.74457596 | 0.35462492 | 0.13773549 |
| O | 0.42191204 | 0.09078439 | 0.77946708 |
| O | 0.41959555 | 0.38216229 | 0.14049988 |
| O | 0.27871539 | 0.15408907 | 0.18467168 |
| O | 0.92256440 | 0.15034705 | 0.77183528 |
| O | 0.92289318 | 0.35723854 | 0.13755048 |
| O | 0.75768602 | 0.10407679 | 0.19327754 |
| O | 0.39345059 | 0.33946145 | 0.74188700 |
| O | 0.39815859 | 0.13138678 | 0.13313431 |
| O | 0.22868684 | 0.41824046 | 0.12489419 |
| O | 0.10878760 | 0.10952823 | 0.24176016 |
| O | 0.09726776 | 0.40141747 | 0.86075326 |
| O | 0.26473564 | 0.15179891 | 0.86025892 |
| O | 0.57988414 | 0.38803120 | 0.23247935 |
| O | 0.57471166 | 0.10226756 | 0.86550306 |
| O | 0.74127082 | 0.35356181 | 0.81261492 |
| O | 0.00370747 | 0.03382443 | 0.15262303 |
| O | 0.07597554 | 0.98214656 | 0.04291711 |
| O | 0.34650376 | 0.01590337 | 0.58009055 |
| O | 0.32358586 | 0.99841284 | 0.77462871 |
| O | 0.34905681 | 0.95246047 | 0.22059883 |
| O | 0.32628787 | 0.96633637 | 0.99232480 |
| O | 0.28936366 | 0.98240328 | 0.36015113 |
| O | 0.49968571 | 0.21380485 | 0.15837510 |
| O | 0.57686258 | 0.23269807 | 0.05554397 |
| O | 0.84295440 | 0.21715474 | 0.57613364 |
| O | 0.82564306 | 0.23306959 | 0.77704214 |
| O | 0.84589677 | 0.25382381 | 0.21737769 |
| O | 0.82658392 | 0.27905886 | 0.99199449 |
| O | 0.78852688 | 0.28587002 | 0.35867490 |
| O | 0.99954757 | 0.96923741 | 0.83462289 |
| O | 0.92660743 | 0.99005288 | 0.94768283 |

|   |            |            |            |
|---|------------|------------|------------|
| O | 0.65507938 | 0.96551859 | 0.42629969 |
| O | 0.67409128 | 0.97276508 | 0.22635324 |
| O | 0.65423937 | 0.01730504 | 0.78644422 |
| O | 0.67191979 | 0.03307566 | 0.01247461 |
| O | 0.71159387 | 0.03174618 | 0.64352014 |
| O | 0.49758840 | 0.27715348 | 0.85478630 |
| O | 0.41997990 | 0.24218737 | 0.95496664 |
| O | 0.15458384 | 0.26193006 | 0.42098521 |
| O | 0.17815438 | 0.30572891 | 0.23017369 |
| O | 0.16173227 | 0.23153548 | 0.80789802 |
| O | 0.16245459 | 0.25464929 | 0.03029574 |
| O | 0.20899288 | 0.22313336 | 0.64311709 |
| O | 0.24490926 | 0.40228699 | 0.52468075 |
| O | 0.75902711 | 0.37779818 | 0.53288220 |
| O | 0.74003000 | 0.12889091 | 0.46888805 |
| O | 0.25460099 | 0.15328794 | 0.48386773 |
| O | 0.08213969 | 0.85975758 | 0.23923182 |
| O | 0.07585707 | 0.65192222 | 0.86996754 |
| O | 0.23662210 | 0.90085290 | 0.81973869 |
| O | 0.60464050 | 0.63821992 | 0.26702600 |
| O | 0.60228696 | 0.85359520 | 0.88288111 |
| O | 0.75865583 | 0.60408464 | 0.86585645 |
| O | 0.89501097 | 0.90112045 | 0.73227573 |
| O | 0.89710941 | 0.60672988 | 0.11503887 |
| O | 0.74130006 | 0.85506697 | 0.13462691 |
| O | 0.42360897 | 0.58958705 | 0.76125742 |
| O | 0.42477501 | 0.88313419 | 0.12237520 |
| O | 0.26181468 | 0.66101565 | 0.18323285 |
| O | 0.91840924 | 0.65029929 | 0.77312933 |
| O | 0.92518487 | 0.85583132 | 0.13438970 |
| O | 0.75981490 | 0.60555728 | 0.18949982 |
| O | 0.39716547 | 0.83958287 | 0.73826698 |
| O | 0.39761555 | 0.63493634 | 0.12921937 |
| O | 0.23973861 | 0.91378055 | 0.14176770 |
| O | 0.10113842 | 0.60594598 | 0.25532193 |

|   |            |            |            |
|---|------------|------------|------------|
| O | 0.10292377 | 0.90024349 | 0.86410290 |
| O | 0.26302894 | 0.65131711 | 0.86518734 |
| O | 0.57699447 | 0.88604080 | 0.23106610 |
| O | 0.57775616 | 0.60240299 | 0.86529706 |
| O | 0.73736118 | 0.85321364 | 0.81427702 |
| O | 0.99910756 | 0.53235255 | 0.13597302 |
| O | 0.08086361 | 0.49502168 | 0.04931962 |
| O | 0.34559373 | 0.50229490 | 0.56867515 |
| O | 0.32395457 | 0.52203843 | 0.76480669 |
| O | 0.33542138 | 0.47052879 | 0.20223757 |
| O | 0.33006924 | 0.46618486 | 0.98131082 |
| O | 0.28086065 | 0.47700751 | 0.35001042 |
| O | 0.50077604 | 0.70215074 | 0.15049147 |
| O | 0.57967337 | 0.73455532 | 0.05481611 |
| O | 0.84384676 | 0.72538903 | 0.57368215 |
| O | 0.82022185 | 0.73839003 | 0.76766229 |
| O | 0.84471536 | 0.76620776 | 0.21134168 |
| O | 0.82790440 | 0.78566636 | 0.98605875 |
| O | 0.78809240 | 0.78721362 | 0.35526731 |
| O | 0.99715395 | 0.47595811 | 0.85054363 |
| O | 0.91573940 | 0.48404927 | 0.94121052 |
| O | 0.65722705 | 0.46703000 | 0.42770176 |
| O | 0.67761290 | 0.47409381 | 0.22924240 |
| O | 0.65578594 | 0.50817628 | 0.78733296 |
| O | 0.67350245 | 0.52730427 | 0.01309918 |
| O | 0.71312864 | 0.53493195 | 0.64498339 |
| O | 0.49973339 | 0.77258708 | 0.85285450 |
| O | 0.42073436 | 0.72435347 | 0.94565331 |
| O | 0.15624932 | 0.75889699 | 0.42870328 |
| O | 0.17851825 | 0.76921667 | 0.23324202 |
| O | 0.15721885 | 0.72359009 | 0.78882847 |
| O | 0.17176432 | 0.73560921 | 0.01353277 |
| O | 0.21605457 | 0.72545580 | 0.64749500 |
| O | 0.24721262 | 0.90212421 | 0.52216631 |
| O | 0.75735402 | 0.87855578 | 0.52790815 |

|    |            |            |            |
|----|------------|------------|------------|
| O  | 0.74256825 | 0.62758216 | 0.46948665 |
| O  | 0.25654034 | 0.65224350 | 0.48270267 |
| Si | 0.43342898 | 0.23743416 | 0.83297953 |
| Si | 0.06745693 | 0.99702704 | 0.16877382 |
| Si | 0.06415352 | 0.00083960 | 0.90405993 |
| Si | 0.37265309 | 0.98646335 | 0.71861698 |
| Si | 0.37479402 | 0.98210264 | 0.11673665 |
| Si | 0.28775681 | 0.00438943 | 0.86207734 |
| Si | 0.28951872 | 0.00194772 | 0.22819781 |
| Si | 0.28411173 | 0.01355671 | 0.48605067 |
| Si | 0.56439930 | 0.24298590 | 0.17794796 |
| Si | 0.56238029 | 0.24146704 | 0.91511584 |
| Si | 0.87199389 | 0.25008701 | 0.71352906 |
| Si | 0.87396070 | 0.24823912 | 0.11551096 |
| Si | 0.78825634 | 0.24332825 | 0.86114485 |
| Si | 0.78400305 | 0.24877621 | 0.22666895 |
| Si | 0.78236238 | 0.25173806 | 0.48378365 |
| Si | 0.93617347 | 0.00266359 | 0.82226492 |
| Si | 0.93915911 | 0.99667500 | 0.08753786 |
| Si | 0.62682401 | 0.99031444 | 0.28720992 |
| Si | 0.62577930 | 0.00130572 | 0.88717008 |
| Si | 0.71109205 | 0.99229027 | 0.14167332 |
| Si | 0.71565632 | 0.00048444 | 0.77664137 |
| Si | 0.71622504 | 0.00077166 | 0.51701130 |
| Si | 0.43465856 | 0.24280331 | 0.09567844 |
| Si | 0.12912194 | 0.25740394 | 0.27984003 |
| Si | 0.12596374 | 0.25910311 | 0.89324917 |
| Si | 0.21889246 | 0.25243749 | 0.77966440 |
| Si | 0.21589162 | 0.25953066 | 0.51844608 |
| Si | 0.43541334 | 0.73144273 | 0.82477674 |
| Si | 0.06398752 | 0.49719912 | 0.16772802 |
| Si | 0.06255898 | 0.50630129 | 0.90769199 |
| Si | 0.37200755 | 0.48804712 | 0.70941351 |
| Si | 0.37055927 | 0.48958273 | 0.11324942 |
| Si | 0.28928454 | 0.50973871 | 0.85472707 |

|    |            |            |            |
|----|------------|------------|------------|
| Si | 0.27605945 | 0.50813787 | 0.21645113 |
| Si | 0.28171911 | 0.50793577 | 0.48090262 |
| Si | 0.56527657 | 0.74040190 | 0.17544141 |
| Si | 0.56474468 | 0.74107846 | 0.91414526 |
| Si | 0.86975640 | 0.75399109 | 0.71254228 |
| Si | 0.87377819 | 0.75349586 | 0.11152896 |
| Si | 0.78624715 | 0.74636936 | 0.85877758 |
| Si | 0.78335553 | 0.75266644 | 0.22265780 |
| Si | 0.78265586 | 0.75416466 | 0.48112866 |
| Si | 0.93197358 | 0.50264397 | 0.82306984 |
| Si | 0.93391520 | 0.49552544 | 0.08246374 |
| Si | 0.62973441 | 0.49185120 | 0.28845861 |
| Si | 0.62714265 | 0.49693923 | 0.88801777 |
| Si | 0.71374946 | 0.49148402 | 0.14250897 |
| Si | 0.71750700 | 0.49947194 | 0.77770579 |
| Si | 0.71827470 | 0.50156846 | 0.51923660 |
| Si | 0.43615844 | 0.73616012 | 0.08630777 |
| Si | 0.12909396 | 0.74903462 | 0.28813358 |
| Si | 0.12700196 | 0.75307499 | 0.88445093 |
| Si | 0.21282015 | 0.76937493 | 0.14246571 |
| Si | 0.21833891 | 0.75129322 | 0.77982311 |
| Si | 0.21915633 | 0.75932042 | 0.51995156 |
| B  | 0.19028884 | 0.32420778 | 0.12856421 |

## HAl(1)-MTW

a = 25.4046 Å

b = 10.2497 Å

c = 12.4293 Å

$\alpha$  = 89.5376°

$\beta$  = 108.657 °

$\gamma$  = 90.2348°

|   |            |            |            |
|---|------------|------------|------------|
| H | 0.46296108 | 0.07205029 | 0.74683518 |
| O | 0.07511730 | 0.35988653 | 0.21989621 |
| O | 0.10580994 | 0.10005237 | 0.88011319 |
| O | 0.25921477 | 0.36291050 | 0.81602779 |
| O | 0.57672370 | 0.09440641 | 0.23057193 |
| O | 0.61225317 | 0.35623433 | 0.89890721 |
| O | 0.76314815 | 0.09822269 | 0.84486814 |
| O | 0.92318560 | 0.34931389 | 0.76414548 |
| O | 0.89196396 | 0.10304909 | 0.11089143 |
| O | 0.73770049 | 0.34902596 | 0.14762896 |
| O | 0.42814650 | 0.09987658 | 0.75938908 |
| O | 0.39538019 | 0.33852063 | 0.13049958 |
| O | 0.26628956 | 0.17277496 | 0.20522208 |
| O | 0.89830786 | 0.09998164 | 0.73134376 |
| O | 0.92044612 | 0.35276923 | 0.11867006 |
| O | 0.76431499 | 0.09915504 | 0.19065235 |
| O | 0.38838040 | 0.35884174 | 0.73358567 |
| O | 0.42074012 | 0.08820240 | 0.12830431 |
| O | 0.24221918 | 0.42197431 | 0.15405116 |
| O | 0.09831506 | 0.10988441 | 0.26050752 |
| O | 0.08956201 | 0.35054842 | 0.90515372 |
| O | 0.24026463 | 0.11061515 | 0.81800147 |
| O | 0.60154723 | 0.34493212 | 0.26620993 |
| O | 0.58246400 | 0.10732232 | 0.88247624 |
| O | 0.73469649 | 0.34822745 | 0.80789297 |
| O | 0.99605870 | 0.03411893 | 0.14050377 |
| O | 0.07970350 | 0.00831173 | 0.05660711 |

|   |            |            |            |
|---|------------|------------|------------|
| O | 0.34127413 | 0.02608496 | 0.58397398 |
| O | 0.33571194 | 0.03241720 | 0.79477660 |
| O | 0.34497560 | 0.99934322 | 0.21728760 |
| O | 0.31980473 | 0.01498702 | 0.99450203 |
| O | 0.29200705 | 0.98641450 | 0.36638289 |
| O | 0.49838593 | 0.27037517 | 0.15532157 |
| O | 0.57857216 | 0.24882539 | 0.05883507 |
| O | 0.84296573 | 0.27323924 | 0.57800538 |
| O | 0.82693096 | 0.26466463 | 0.77743027 |
| O | 0.84383617 | 0.27254587 | 0.20895411 |
| O | 0.82023040 | 0.27854474 | 0.98586198 |
| O | 0.79041091 | 0.27362049 | 0.35891238 |
| O | 0.00179575 | 0.03339457 | 0.85429461 |
| O | 0.91850440 | 0.00572691 | 0.93881915 |
| O | 0.65638353 | 0.01563370 | 0.41592156 |
| O | 0.67180032 | 0.00589683 | 0.21543143 |
| O | 0.65688748 | 0.02293172 | 0.78737566 |
| O | 0.68256215 | 0.02224081 | 0.01032942 |
| O | 0.70906348 | 0.02196402 | 0.63479769 |
| O | 0.50544303 | 0.28766971 | 0.85083462 |
| O | 0.41983518 | 0.24071445 | 0.95401493 |
| O | 0.15566883 | 0.28669636 | 0.40701913 |
| O | 0.16961944 | 0.26687116 | 0.20593858 |
| O | 0.15640272 | 0.27451358 | 0.78921324 |
| O | 0.18909892 | 0.24161171 | 0.01083353 |
| O | 0.19998847 | 0.24528711 | 0.62586079 |
| O | 0.25964320 | 0.36874559 | 0.51537625 |
| O | 0.73702320 | 0.35206419 | 0.49945371 |
| O | 0.76128736 | 0.10269075 | 0.49178441 |
| O | 0.23834390 | 0.11862557 | 0.48071671 |
| O | 0.07385038 | 0.85916505 | 0.22974884 |
| O | 0.10398920 | 0.60228262 | 0.87062435 |
| O | 0.26376594 | 0.85977605 | 0.82428501 |
| O | 0.57535660 | 0.59431418 | 0.22431116 |
| O | 0.60613828 | 0.85698805 | 0.88488861 |

|   |            |            |            |
|---|------------|------------|------------|
| O | 0.76244337 | 0.59747085 | 0.83959354 |
| O | 0.92602555 | 0.85228619 | 0.77100400 |
| O | 0.89246483 | 0.60231128 | 0.10664669 |
| O | 0.74035897 | 0.84689705 | 0.15758896 |
| O | 0.42442265 | 0.60263062 | 0.76626700 |
| O | 0.39215754 | 0.83754033 | 0.11302044 |
| O | 0.26122418 | 0.67479149 | 0.19375029 |
| O | 0.90318955 | 0.60182829 | 0.73755312 |
| O | 0.91819850 | 0.85282191 | 0.11255193 |
| O | 0.76619044 | 0.59666256 | 0.19734880 |
| O | 0.39950563 | 0.85225388 | 0.73669268 |
| O | 0.42004169 | 0.58850769 | 0.11177609 |
| O | 0.23813097 | 0.92622790 | 0.15260733 |
| O | 0.09891644 | 0.60927193 | 0.26531345 |
| O | 0.07941070 | 0.85079912 | 0.88752258 |
| O | 0.23730587 | 0.61205890 | 0.83840369 |
| O | 0.60019715 | 0.84349879 | 0.26403358 |
| O | 0.58164771 | 0.60507270 | 0.88287123 |
| O | 0.73632320 | 0.84868911 | 0.80500898 |
| O | 0.99725630 | 0.53650956 | 0.13993909 |
| O | 0.08184436 | 0.52486402 | 0.05655497 |
| O | 0.33986152 | 0.54513243 | 0.58205203 |
| O | 0.32587135 | 0.54776021 | 0.78303167 |
| O | 0.34576274 | 0.51807993 | 0.21329669 |
| O | 0.32096864 | 0.49766273 | 0.99109350 |
| O | 0.29291133 | 0.50211710 | 0.36401187 |
| O | 0.49722076 | 0.77209316 | 0.14647209 |
| O | 0.57814357 | 0.75415066 | 0.05510530 |
| O | 0.84517201 | 0.77237721 | 0.58666644 |
| O | 0.83186581 | 0.76215517 | 0.78922084 |
| O | 0.84615191 | 0.76804430 | 0.21321297 |
| O | 0.81645448 | 0.77358653 | 0.98980621 |
| O | 0.79481597 | 0.76867175 | 0.36731764 |
| O | 0.00413060 | 0.51414639 | 0.85401205 |
| O | 0.92075894 | 0.49519196 | 0.93970489 |



|    |            |            |            |
|----|------------|------------|------------|
| O  | 0.65665656 | 0.52492185 | 0.41220430 |
| O  | 0.67100904 | 0.50813640 | 0.21166479 |
| O  | 0.65587023 | 0.52421381 | 0.78730079 |
| O  | 0.68415720 | 0.53842717 | 0.00996997 |
| O  | 0.70588833 | 0.51617503 | 0.63245471 |
| O  | 0.50229875 | 0.78291923 | 0.85032645 |
| O  | 0.42161852 | 0.74873898 | 0.94236480 |
| O  | 0.15097445 | 0.78328219 | 0.42151147 |
| O  | 0.17239719 | 0.77538883 | 0.22802097 |
| O  | 0.15830259 | 0.78874480 | 0.79824085 |
| O  | 0.17616306 | 0.75161505 | 0.01780921 |
| O  | 0.20272604 | 0.73566393 | 0.63867356 |
| O  | 0.25587545 | 0.86709870 | 0.52201016 |
| O  | 0.73991526 | 0.85193060 | 0.50475485 |
| O  | 0.76298294 | 0.60198158 | 0.50002297 |
| O  | 0.23414251 | 0.61721713 | 0.47803130 |
| Al | 0.43603790 | 0.26414860 | 0.83183735 |
| Si | 0.06174170 | 0.00312935 | 0.17138438 |
| Si | 0.06644730 | 0.99822293 | 0.91955313 |
| Si | 0.37288503 | 0.99605875 | 0.71643542 |
| Si | 0.37001337 | 0.98599796 | 0.11276853 |
| Si | 0.28951617 | 0.00416710 | 0.85905702 |
| Si | 0.28512972 | 0.02181858 | 0.23499192 |
| Si | 0.28099294 | 0.00014681 | 0.48659935 |
| Si | 0.56336265 | 0.24026651 | 0.17630697 |
| Si | 0.56843141 | 0.25215234 | 0.92217335 |
| Si | 0.87270971 | 0.24657894 | 0.71291481 |
| Si | 0.86921755 | 0.25153057 | 0.10568816 |
| Si | 0.78638247 | 0.24720369 | 0.85419017 |
| Si | 0.78379359 | 0.24826941 | 0.22684267 |
| Si | 0.78270312 | 0.25067585 | 0.48183861 |
| Si | 0.93637934 | 0.99802634 | 0.82427755 |
| Si | 0.93133544 | 0.99883695 | 0.07587441 |
| Si | 0.62633118 | 0.98977166 | 0.28125308 |
| Si | 0.63198603 | 0.00324428 | 0.89206238 |

|    |            |            |            |
|----|------------|------------|------------|
| Si | 0.71462386 | 0.99323147 | 0.14363044 |
| Si | 0.71647805 | 0.99781847 | 0.76777553 |
| Si | 0.71688743 | 0.99829483 | 0.51220493 |
| Si | 0.43353448 | 0.23473686 | 0.08923258 |
| Si | 0.12481427 | 0.25568408 | 0.27346924 |
| Si | 0.13492313 | 0.24296367 | 0.89683734 |
| Si | 0.21681482 | 0.27528040 | 0.14436417 |
| Si | 0.21422208 | 0.24966855 | 0.76231734 |
| Si | 0.21359629 | 0.25604991 | 0.50766097 |
| Si | 0.06310367 | 0.50769508 | 0.16999961 |
| Si | 0.06978907 | 0.49747410 | 0.92143950 |
| Si | 0.36964378 | 0.50860804 | 0.71604284 |
| Si | 0.37081101 | 0.48535994 | 0.11125571 |
| Si | 0.28641220 | 0.50421680 | 0.85728336 |
| Si | 0.28536179 | 0.52912639 | 0.23139323 |
| Si | 0.28173827 | 0.50886482 | 0.48475763 |
| Si | 0.56264099 | 0.74098000 | 0.17228369 |
| Si | 0.56728351 | 0.74934232 | 0.91888522 |
| Si | 0.87633835 | 0.74676538 | 0.72117476 |
| Si | 0.86853085 | 0.74907634 | 0.10534859 |
| Si | 0.78674803 | 0.74533634 | 0.85569041 |
| Si | 0.78666856 | 0.74513478 | 0.23428291 |
| Si | 0.78548963 | 0.74882984 | 0.48924163 |
| Si | 0.93804069 | 0.49054927 | 0.82451095 |
| Si | 0.93290228 | 0.49691380 | 0.07649359 |
| Si | 0.62608167 | 0.49250901 | 0.27870384 |
| Si | 0.63301750 | 0.50512341 | 0.89481996 |
| Si | 0.71467177 | 0.49768513 | 0.14170120 |
| Si | 0.71493133 | 0.49649851 | 0.76646382 |
| Si | 0.71581572 | 0.49927277 | 0.51114999 |
| Si | 0.43741497 | 0.74404886 | 0.82572903 |
| Si | 0.43293853 | 0.73627776 | 0.07901526 |
| Si | 0.12391088 | 0.75649341 | 0.28571006 |
| Si | 0.12939304 | 0.74912853 | 0.89356898 |
| Si | 0.21166820 | 0.78067580 | 0.14807756 |

|    |            |            |            |
|----|------------|------------|------------|
| Si | 0.21571427 | 0.75008648 | 0.77441156 |
| Si | 0.21106482 | 0.75095181 | 0.51559740 |

### HAl(2)-MTW

a = 25.2874 Å

b = 10.2498 Å

c = 12.4169 Å

$\alpha$  = 91.0555°

$\beta$  = 108.792°

$\gamma$  = 89.5775°

|   |            |            |            |
|---|------------|------------|------------|
| H | 0.36516939 | 0.38436314 | 0.86789908 |
| O | 0.07487444 | 0.35890651 | 0.23672006 |
| O | 0.07937000 | 0.14518438 | 0.88062381 |
| O | 0.23628834 | 0.39251083 | 0.80844323 |
| O | 0.59050283 | 0.15411687 | 0.26930518 |
| O | 0.60801274 | 0.34339863 | 0.89153837 |
| O | 0.75810389 | 0.10735626 | 0.84742865 |
| O | 0.90477484 | 0.39423914 | 0.73659144 |
| O | 0.89078022 | 0.11282265 | 0.09420390 |
| O | 0.73792049 | 0.34842526 | 0.15400445 |
| O | 0.42687033 | 0.08831829 | 0.79361796 |
| O | 0.41285532 | 0.41020904 | 0.11352190 |
| O | 0.24022774 | 0.08815393 | 0.19356618 |
| O | 0.92495590 | 0.14179756 | 0.76455488 |
| O | 0.91877802 | 0.36213966 | 0.11757660 |
| O | 0.76388104 | 0.10070809 | 0.20139088 |
| O | 0.40729644 | 0.33278617 | 0.71593926 |
| O | 0.38945123 | 0.15813722 | 0.09073261 |
| O | 0.26292644 | 0.33812649 | 0.17494636 |
| O | 0.09829775 | 0.10537698 | 0.24765944 |
| O | 0.11025930 | 0.39459548 | 0.89384393 |
| O | 0.26181997 | 0.14381950 | 0.84498903 |
| O | 0.57291469 | 0.40521789 | 0.22113157 |
| O | 0.58350819 | 0.09102459 | 0.88385430 |

|   |            |            |            |
|---|------------|------------|------------|
| O | 0.73849165 | 0.35583752 | 0.79248186 |
| O | 0.99543013 | 0.03675899 | 0.12798557 |
| O | 0.07977691 | 0.98683403 | 0.04742602 |
| O | 0.34665001 | 0.03193508 | 0.59831402 |
| O | 0.33154103 | 0.98144725 | 0.79358173 |
| O | 0.34579319 | 0.01618380 | 0.21559959 |
| O | 0.31616775 | 0.96968807 | 0.99469586 |
| O | 0.30495792 | 0.97589563 | 0.38117693 |
| O | 0.49343677 | 0.23563390 | 0.12235582 |
| O | 0.58637068 | 0.23667958 | 0.06576605 |
| O | 0.84520536 | 0.22611114 | 0.58166321 |
| O | 0.83154965 | 0.24043566 | 0.78483124 |
| O | 0.84395115 | 0.27076107 | 0.20787260 |
| O | 0.81719256 | 0.29262569 | 0.98432894 |
| O | 0.79509934 | 0.28367183 | 0.36608072 |
| O | 0.00184676 | 0.96154643 | 0.84483105 |
| O | 0.91743624 | 0.98738364 | 0.93028030 |
| O | 0.65517611 | 0.98127823 | 0.41352251 |
| O | 0.66602570 | 0.01641110 | 0.20975355 |
| O | 0.65672944 | 0.00216885 | 0.78732420 |
| O | 0.68572022 | 0.02281243 | 0.01181688 |
| O | 0.70608815 | 0.03757580 | 0.63144456 |
| O | 0.50522288 | 0.26721690 | 0.87091949 |
| O | 0.41217569 | 0.28468845 | 0.92617210 |
| O | 0.15264143 | 0.26269818 | 0.41708582 |
| O | 0.17109297 | 0.27612547 | 0.21811395 |
| O | 0.15573590 | 0.22137907 | 0.79087496 |
| O | 0.18088332 | 0.21701062 | 0.01484380 |
| O | 0.20530050 | 0.21853772 | 0.63463018 |
| O | 0.24904662 | 0.38212227 | 0.52575926 |
| O | 0.75625093 | 0.37961761 | 0.52748469 |
| O | 0.74465198 | 0.12828381 | 0.47008259 |
| O | 0.24687213 | 0.12790199 | 0.47614447 |
| O | 0.07095732 | 0.85538714 | 0.22177911 |
| O | 0.08645626 | 0.64705496 | 0.89465455 |

|   |            |            |            |
|---|------------|------------|------------|
| O | 0.23615313 | 0.89149387 | 0.80848449 |
| O | 0.59622412 | 0.65288646 | 0.27525329 |
| O | 0.61257673 | 0.84057225 | 0.89928250 |
| O | 0.75503743 | 0.60715201 | 0.84461713 |
| O | 0.89846506 | 0.89192419 | 0.72320795 |
| O | 0.89214579 | 0.61224919 | 0.10603991 |
| O | 0.73657934 | 0.84972123 | 0.16559900 |
| O | 0.43119852 | 0.59714261 | 0.78959370 |
| O | 0.41979337 | 0.91055637 | 0.12549531 |
| O | 0.23814030 | 0.58932116 | 0.18138807 |
| O | 0.92825223 | 0.64455198 | 0.76569423 |
| O | 0.91664811 | 0.86279264 | 0.11626502 |
| O | 0.76279655 | 0.60011568 | 0.19449917 |
| O | 0.40572226 | 0.84300487 | 0.73005303 |
| O | 0.39037860 | 0.66254409 | 0.10625517 |
| O | 0.26710329 | 0.83778987 | 0.18948747 |
| O | 0.10107794 | 0.60984741 | 0.26809423 |
| O | 0.10736594 | 0.89514292 | 0.87209488 |
| O | 0.26625207 | 0.64225103 | 0.81579959 |
| O | 0.57482679 | 0.90255131 | 0.22784677 |
| O | 0.57885550 | 0.59422258 | 0.88338238 |
| O | 0.74401599 | 0.85684907 | 0.78913997 |
| O | 0.99795181 | 0.53839119 | 0.14512166 |
| O | 0.08292234 | 0.49965969 | 0.06499397 |
| O | 0.33379380 | 0.54529554 | 0.59155280 |
| O | 0.34029517 | 0.45528546 | 0.81696889 |
| O | 0.34407920 | 0.51032151 | 0.22060204 |
| O | 0.31013871 | 0.49209011 | 0.99767302 |
| O | 0.29380516 | 0.46798268 | 0.37338946 |
| O | 0.49617934 | 0.72647674 | 0.13958136 |
| O | 0.58517300 | 0.73624513 | 0.06830792 |
| O | 0.83980183 | 0.70765451 | 0.58657147 |
| O | 0.83634024 | 0.72817782 | 0.79762391 |
| O | 0.84299441 | 0.77427332 | 0.21148543 |
| O | 0.81514161 | 0.78435187 | 0.98865294 |

|    |            |            |            |
|----|------------|------------|------------|
| O  | 0.79615822 | 0.76857698 | 0.37081237 |
| O  | 0.00646095 | 0.47075731 | 0.85998082 |
| O  | 0.92181223 | 0.50223518 | 0.94055811 |
| O  | 0.65321187 | 0.46586570 | 0.41304589 |
| O  | 0.66887257 | 0.50504753 | 0.21461273 |
| O  | 0.65244209 | 0.50929543 | 0.78557264 |
| O  | 0.68076777 | 0.52370799 | 0.00998777 |
| O  | 0.70192264 | 0.53224849 | 0.63023727 |
| O  | 0.50645177 | 0.78665709 | 0.87164863 |
| O  | 0.41789743 | 0.77319868 | 0.94051361 |
| O  | 0.15387433 | 0.80154506 | 0.40993640 |
| O  | 0.16892757 | 0.77443925 | 0.20974024 |
| O  | 0.16001481 | 0.71040014 | 0.79187030 |
| O  | 0.18663389 | 0.74537603 | 0.01202206 |
| O  | 0.19999057 | 0.73552526 | 0.62303497 |
| O  | 0.25856885 | 0.87616074 | 0.52662464 |
| O  | 0.75597768 | 0.87834433 | 0.52475704 |
| O  | 0.73746492 | 0.62830899 | 0.46800965 |
| O  | 0.23455631 | 0.62796850 | 0.45860919 |
| Al | 0.38043647 | 0.48935800 | 0.71462875 |
| Si | 0.06078719 | 0.99660926 | 0.16078651 |
| Si | 0.06686237 | 0.99687341 | 0.91066789 |
| Si | 0.37759413 | 0.98587063 | 0.72809613 |
| Si | 0.36817711 | 0.01290762 | 0.10674572 |
| Si | 0.28652760 | 0.99572184 | 0.85989070 |
| Si | 0.28916357 | 0.98057465 | 0.24429254 |
| Si | 0.28878883 | 0.00310722 | 0.49548067 |
| Si | 0.56081292 | 0.25765644 | 0.16988281 |
| Si | 0.57087809 | 0.23465114 | 0.92742278 |
| Si | 0.87636585 | 0.25084912 | 0.71698863 |
| Si | 0.86778025 | 0.25971964 | 0.10099965 |
| Si | 0.78640668 | 0.25004430 | 0.85223884 |
| Si | 0.78508824 | 0.25048498 | 0.23252380 |
| Si | 0.78510072 | 0.25443304 | 0.48591618 |
| Si | 0.93603098 | 0.99614193 | 0.81641542 |

|    |            |            |            |
|----|------------|------------|------------|
| Si | 0.93007331 | 0.00022384 | 0.06730683 |
| Si | 0.62221651 | 0.01324367 | 0.28064549 |
| Si | 0.63447062 | 0.98843928 | 0.89578085 |
| Si | 0.71300000 | 0.99818817 | 0.14744640 |
| Si | 0.71637876 | 0.00102179 | 0.76356080 |
| Si | 0.71568951 | 0.00568299 | 0.51045982 |
| Si | 0.43870215 | 0.24263128 | 0.82118206 |
| Si | 0.42807306 | 0.27098852 | 0.06624785 |
| Si | 0.12421038 | 0.25035687 | 0.27983484 |
| Si | 0.13132985 | 0.24455992 | 0.89599072 |
| Si | 0.21364936 | 0.22975707 | 0.15053069 |
| Si | 0.21479898 | 0.24356084 | 0.76852939 |
| Si | 0.21385897 | 0.24848052 | 0.51319029 |
| Si | 0.06384245 | 0.50178500 | 0.17855888 |
| Si | 0.07133477 | 0.50302634 | 0.92839486 |
| Si | 0.36506437 | 0.51930543 | 0.11049156 |
| Si | 0.28574045 | 0.49755040 | 0.86012929 |
| Si | 0.28432151 | 0.47769885 | 0.23871180 |
| Si | 0.27898205 | 0.50634745 | 0.48845786 |
| Si | 0.56283957 | 0.75471701 | 0.17717090 |
| Si | 0.57038155 | 0.73986964 | 0.93010424 |
| Si | 0.87545129 | 0.74337868 | 0.71775101 |
| Si | 0.86694246 | 0.75833779 | 0.10518454 |
| Si | 0.78746482 | 0.74511537 | 0.85486644 |
| Si | 0.78437734 | 0.74775218 | 0.23541170 |
| Si | 0.78219226 | 0.74639255 | 0.48739188 |
| Si | 0.94041309 | 0.50312738 | 0.82656179 |
| Si | 0.93290192 | 0.50420851 | 0.07734636 |
| Si | 0.62324151 | 0.50744379 | 0.28116647 |
| Si | 0.62973652 | 0.49226546 | 0.89301197 |
| Si | 0.71243263 | 0.49549221 | 0.14347532 |
| Si | 0.71226836 | 0.50106190 | 0.76320542 |
| Si | 0.71251994 | 0.50062403 | 0.51051471 |
| Si | 0.44056967 | 0.74584975 | 0.83183136 |
| Si | 0.43152374 | 0.76773390 | 0.07739215 |

|    |            |            |            |
|----|------------|------------|------------|
| Si | 0.12388526 | 0.75900121 | 0.27732957 |
| Si | 0.13486445 | 0.74985022 | 0.89351620 |
| Si | 0.21509148 | 0.73632495 | 0.14897240 |
| Si | 0.21555227 | 0.74590383 | 0.75944979 |
| Si | 0.21265575 | 0.76014621 | 0.50509524 |

### HAl(3)-MTW

$$a = 25.314 \text{ \AA}$$

$$b = 10.2469 \text{ \AA}$$

$$c = 12.4749 \text{ \AA}$$

$$\alpha = 89.9806^\circ$$

$$\beta = 109.011^\circ$$

$$\gamma = 89.9976^\circ$$

|   |            |            |            |
|---|------------|------------|------------|
| H | 0.37605753 | 0.45111047 | 0.53909366 |
| O | 0.10118586 | 0.39082589 | 0.26574214 |
| O | 0.07694565 | 0.14367082 | 0.87965432 |
| O | 0.23228101 | 0.39635367 | 0.80673331 |
| O | 0.60168707 | 0.14433115 | 0.26321744 |
| O | 0.57893533 | 0.39283334 | 0.88118636 |
| O | 0.73429091 | 0.15048967 | 0.81233412 |
| O | 0.89939610 | 0.39599269 | 0.73751431 |
| O | 0.91983773 | 0.14359726 | 0.11733002 |
| O | 0.76661566 | 0.40170357 | 0.18514135 |
| O | 0.39875760 | 0.14005185 | 0.73243394 |
| O | 0.41868265 | 0.39349040 | 0.10594110 |
| O | 0.26626993 | 0.15187317 | 0.18331384 |
| O | 0.92368431 | 0.14446910 | 0.77371088 |
| O | 0.89394094 | 0.39372276 | 0.11550377 |
| O | 0.73791098 | 0.15196643 | 0.16275269 |
| O | 0.42520702 | 0.38689864 | 0.77523539 |
| O | 0.39599449 | 0.14293297 | 0.12142243 |
| O | 0.23479437 | 0.40119974 | 0.15113288 |
| O | 0.07622706 | 0.14182183 | 0.22581191 |
| O | 0.10570055 | 0.39252821 | 0.88238498 |



|   |             |            |            |
|---|-------------|------------|------------|
| O | 0.26221489  | 0.15018143 | 0.84849422 |
| O | 0.57732947  | 0.39446017 | 0.22698758 |
| O | 0.60813951  | 0.14447662 | 0.88384168 |
| O | 0.76193978  | 0.40138901 | 0.84419892 |
| O | 0.99807796  | 0.96422882 | 0.14011867 |
| O | 0.08131659  | 0.99030736 | 0.05518751 |
| O | 0.33950802  | 0.96755198 | 0.58346424 |
| O | 0.32647656  | 0.98151761 | 0.78558705 |
| O | 0.34581506  | 0.97356694 | 0.21621453 |
| O | 0.32097845  | 0.97476788 | 0.99387978 |
| O | 0.29368955  | 0.99595138 | 0.36508007 |
| O | 0.49895957  | 0.21725948 | 0.14189777 |
| O | 0.58225927  | 0.24110011 | 0.05710106 |
| O | 0.84420847  | 0.22165202 | 0.58577805 |
| O | 0.82733991  | 0.23362082 | 0.78387683 |
| O | 0.84526995  | 0.22314173 | 0.21327850 |
| O | 0.81863959  | 0.22443155 | 0.99079716 |
| O | 0.79425694  | 0.24460499 | 0.36621600 |
| O | -0.00011797 | 0.96178392 | 0.85745364 |
| O | 0.91644033  | 0.99153155 | 0.94198143 |
| O | 0.65701220  | 0.96974703 | 0.41459650 |
| O | 0.67143542  | 0.97810412 | 0.21307440 |
| O | 0.65628709  | 0.97172457 | 0.78681524 |
| O | 0.68446526  | 0.97765785 | 0.01003475 |
| O | 0.70791676  | 0.98859769 | 0.63424560 |
| O | 0.50286819  | 0.20789392 | 0.85648218 |
| O | 0.41883509  | 0.22836461 | 0.94116958 |
| O | 0.15511907  | 0.21318610 | 0.41734152 |
| O | 0.17444684  | 0.22862394 | 0.22204005 |
| O | 0.15413957  | 0.21801153 | 0.78907135 |
| O | 0.17759916  | 0.21910738 | 0.01136330 |
| O | 0.20585175  | 0.22037724 | 0.63740161 |
| O | 0.23182132  | 0.39817116 | 0.50575162 |
| O | 0.76272502  | 0.39436714 | 0.50842028 |
| O | 0.73798449  | 0.14365893 | 0.49276272 |

|   |            |            |            |
|---|------------|------------|------------|
| O | 0.26441310 | 0.15481263 | 0.50429270 |
| O | 0.10134687 | 0.89142208 | 0.25993912 |
| O | 0.08128549 | 0.64341543 | 0.88785057 |
| O | 0.23441861 | 0.89857832 | 0.82251135 |
| O | 0.60184918 | 0.64447500 | 0.26540336 |
| O | 0.58301404 | 0.89514540 | 0.88695407 |
| O | 0.73333705 | 0.65109149 | 0.81584625 |
| O | 0.89610679 | 0.89544821 | 0.73596780 |
| O | 0.92005524 | 0.64356731 | 0.11851675 |
| O | 0.76691601 | 0.90106205 | 0.19087849 |
| O | 0.40204646 | 0.63814952 | 0.74278713 |
| O | 0.42101983 | 0.89229298 | 0.12228364 |
| O | 0.26659268 | 0.64916332 | 0.17969886 |
| O | 0.92457122 | 0.64610198 | 0.77227977 |
| O | 0.89432717 | 0.89365069 | 0.11891335 |
| O | 0.73723288 | 0.65238882 | 0.15469484 |
| O | 0.42136015 | 0.89065914 | 0.76765095 |
| O | 0.39401819 | 0.64170532 | 0.11551088 |
| O | 0.23858977 | 0.90116492 | 0.16115627 |
| O | 0.07676149 | 0.64121306 | 0.22693930 |
| O | 0.10382089 | 0.89386016 | 0.87837524 |
| O | 0.26011032 | 0.64838342 | 0.82439049 |
| O | 0.57547655 | 0.89392370 | 0.22933561 |
| O | 0.60521670 | 0.64308216 | 0.88407296 |
| O | 0.76369524 | 0.90089223 | 0.84041394 |
| O | 0.99838115 | 0.46385341 | 0.14270477 |
| O | 0.08245616 | 0.48567835 | 0.05942467 |
| O | 0.35009739 | 0.46935927 | 0.58170223 |
| O | 0.32330504 | 0.47373687 | 0.76591889 |
| O | 0.34213996 | 0.46483869 | 0.19940996 |
| O | 0.31989197 | 0.48017300 | 0.97602816 |
| O | 0.29431286 | 0.48664758 | 0.35841869 |
| O | 0.49858995 | 0.71292640 | 0.14240745 |
| O | 0.58284026 | 0.74285345 | 0.06037795 |
| O | 0.84357520 | 0.71814437 | 0.58412501 |

|    |            |            |            |
|----|------------|------------|------------|
| O  | 0.82663346 | 0.72455245 | 0.78235742 |
| O  | 0.84492060 | 0.72181853 | 0.21333742 |
| O  | 0.81937493 | 0.72603106 | 0.99070754 |
| O  | 0.79201386 | 0.73235059 | 0.36389991 |
| O  | 0.00225298 | 0.46658075 | 0.85894967 |
| O  | 0.91854558 | 0.49509645 | 0.94254255 |
| O  | 0.65595977 | 0.46918744 | 0.41771988 |
| O  | 0.67497730 | 0.48200129 | 0.22171351 |
| O  | 0.65458937 | 0.47261493 | 0.78860260 |
| O  | 0.67927605 | 0.47326814 | 0.01169382 |
| O  | 0.70653962 | 0.48913758 | 0.63750456 |
| O  | 0.50264704 | 0.72208078 | 0.86035710 |
| O  | 0.41839285 | 0.74555960 | 0.94369416 |
| O  | 0.15695970 | 0.71892235 | 0.41333095 |
| O  | 0.17350974 | 0.72638890 | 0.21477657 |
| O  | 0.15398848 | 0.72183470 | 0.78615512 |
| O  | 0.18177271 | 0.73242396 | 0.00793297 |
| O  | 0.20146774 | 0.76299499 | 0.63052298 |
| O  | 0.23076671 | 0.90954167 | 0.48466724 |
| O  | 0.76342390 | 0.89337972 | 0.50337044 |
| O  | 0.73642999 | 0.64442619 | 0.49641157 |
| O  | 0.26574896 | 0.66384701 | 0.51732644 |
| Al | 0.27717091 | 0.50779598 | 0.47988146 |
| Si | 0.06412364 | 0.99701883 | 0.17019583 |
| Si | 0.06545770 | 0.99741512 | 0.91782843 |
| Si | 0.37063184 | 0.99479633 | 0.71689222 |
| Si | 0.37088094 | 0.99590237 | 0.11322154 |
| Si | 0.28583612 | 0.00159953 | 0.86195764 |
| Si | 0.28546752 | 0.00551469 | 0.23159948 |
| Si | 0.28132754 | 0.00634530 | 0.48388849 |
| Si | 0.56485681 | 0.24940419 | 0.17186449 |
| Si | 0.56805709 | 0.24638084 | 0.92003707 |
| Si | 0.87379042 | 0.24938477 | 0.72048589 |
| Si | 0.86973588 | 0.24634879 | 0.10902726 |
| Si | 0.78589885 | 0.25295423 | 0.85797625 |

|    |            |            |            |
|----|------------|------------|------------|
| Si | 0.78595190 | 0.25499271 | 0.23240283 |
| Si | 0.78470509 | 0.25050962 | 0.48796709 |
| Si | 0.93441441 | 0.99846299 | 0.82781819 |
| Si | 0.93253836 | 0.99811458 | 0.07966374 |
| Si | 0.62662983 | 0.99681384 | 0.28010522 |
| Si | 0.63301596 | 0.99721109 | 0.89228916 |
| Si | 0.71515836 | 0.00277653 | 0.14443496 |
| Si | 0.71591193 | 0.00260783 | 0.76784857 |
| Si | 0.71687617 | 0.99849394 | 0.51191635 |
| Si | 0.43688768 | 0.23892686 | 0.82776567 |
| Si | 0.43313296 | 0.24561810 | 0.07806682 |
| Si | 0.12695282 | 0.24385368 | 0.28310135 |
| Si | 0.12855522 | 0.24352320 | 0.89111016 |
| Si | 0.21307976 | 0.25114338 | 0.14229930 |
| Si | 0.21349780 | 0.24615986 | 0.76904535 |
| Si | 0.21423451 | 0.24956335 | 0.51567340 |
| Si | 0.06459557 | 0.49536363 | 0.17365685 |
| Si | 0.06800984 | 0.49725071 | 0.92255230 |
| Si | 0.37634070 | 0.49336157 | 0.72425309 |
| Si | 0.36806925 | 0.49505027 | 0.09908419 |
| Si | 0.28314802 | 0.50036171 | 0.84417162 |
| Si | 0.28411265 | 0.50019741 | 0.22507395 |
| Si | 0.56434454 | 0.74863149 | 0.17396547 |
| Si | 0.56855485 | 0.75088520 | 0.92344211 |
| Si | 0.87284530 | 0.74653226 | 0.71893435 |
| Si | 0.86991668 | 0.74622026 | 0.11001823 |
| Si | 0.78611709 | 0.75117036 | 0.85760606 |
| Si | 0.78520655 | 0.75174909 | 0.23130713 |
| Si | 0.78385602 | 0.74661251 | 0.48663426 |
| Si | 0.93662125 | 0.50110915 | 0.82851836 |
| Si | 0.93312992 | 0.49886945 | 0.07987397 |
| Si | 0.62764953 | 0.49776460 | 0.28280520 |
| Si | 0.62956486 | 0.49562091 | 0.89184954 |
| Si | 0.71444153 | 0.50297431 | 0.14328854 |
| Si | 0.71447963 | 0.50342817 | 0.77100078 |

|    |            |            |            |
|----|------------|------------|------------|
| Si | 0.71568505 | 0.49877742 | 0.51543758 |
| Si | 0.43657537 | 0.75065554 | 0.83022992 |
| Si | 0.43302931 | 0.74810801 | 0.08138735 |
| Si | 0.12738455 | 0.74499143 | 0.27893961 |
| Si | 0.13005844 | 0.74787064 | 0.89053923 |
| Si | 0.21506988 | 0.75252692 | 0.14165982 |
| Si | 0.21249144 | 0.75738201 | 0.76479180 |
| Si | 0.21500283 | 0.76111478 | 0.51201546 |

### HAl(4)-MTW

a = 25.6012 Å

b = 10.2329 Å

c = 12.3117 Å

$\alpha$  = 90.3268°

$\beta$  = 109.167°

$\gamma$  = 90.3159°

|   |            |            |            |
|---|------------|------------|------------|
| H | 0.27600246 | 0.39637532 | 0.07885679 |
| O | 0.09071578 | 0.42806083 | 0.25735855 |
| O | 0.08079503 | 0.14804821 | 0.89696636 |
| O | 0.25609386 | 0.30994045 | 0.82944611 |
| O | 0.60226494 | 0.14501025 | 0.26954742 |
| O | 0.60557514 | 0.34852346 | 0.88361312 |
| O | 0.75755454 | 0.09857683 | 0.83786240 |
| O | 0.90055830 | 0.39893718 | 0.72089188 |
| O | 0.89136117 | 0.10497747 | 0.11115768 |
| O | 0.73701107 | 0.35234777 | 0.14819162 |
| O | 0.42186036 | 0.10431851 | 0.76701618 |
| O | 0.42117505 | 0.38962241 | 0.12953619 |
| O | 0.25317182 | 0.14879098 | 0.21503404 |
| O | 0.92358147 | 0.14986598 | 0.76552484 |
| O | 0.91488084 | 0.35726384 | 0.11741476 |
| O | 0.75891209 | 0.10398238 | 0.20003926 |
| O | 0.40731468 | 0.35883218 | 0.74111042 |
| O | 0.40647261 | 0.13289146 | 0.12406287 |

|   |            |            |            |
|---|------------|------------|------------|
| O | 0.25843809 | 0.39261783 | 0.14315582 |
| O | 0.09236153 | 0.17703619 | 0.20702027 |
| O | 0.10717001 | 0.39722237 | 0.89756172 |
| O | 0.23299626 | 0.05679391 | 0.81449504 |
| O | 0.58398735 | 0.39744116 | 0.22556586 |
| O | 0.58165756 | 0.09601012 | 0.87130221 |
| O | 0.73807551 | 0.35124775 | 0.79822166 |
| O | 0.99797784 | 0.04838354 | 0.16131665 |
| O | 0.07043727 | 0.98270246 | 0.05660774 |
| O | 0.33984604 | 0.02758227 | 0.57851702 |
| O | 0.32839102 | 0.00723424 | 0.78331655 |
| O | 0.34181090 | 0.01275814 | 0.21723056 |
| O | 0.32070258 | 0.99581749 | 0.99232580 |
| O | 0.28885186 | 0.95693113 | 0.36268690 |
| O | 0.50343739 | 0.22827919 | 0.13859876 |
| O | 0.58889987 | 0.23273451 | 0.06086904 |
| O | 0.84006338 | 0.21615553 | 0.58009184 |
| O | 0.83147715 | 0.24732848 | 0.78747480 |
| O | 0.84176318 | 0.26790761 | 0.21288550 |
| O | 0.81521792 | 0.27326948 | 0.98797347 |
| O | 0.78987593 | 0.28720223 | 0.36449537 |
| O | 0.00131884 | 0.97034978 | 0.84160799 |
| O | 0.92769837 | 0.01109062 | 0.94898914 |
| O | 0.65585746 | 0.95494878 | 0.40671723 |
| O | 0.66675339 | 0.98198630 | 0.20155253 |
| O | 0.65452734 | 0.99983393 | 0.77959212 |
| O | 0.68307980 | 0.03084831 | 0.00387562 |
| O | 0.70423241 | 0.02156516 | 0.62433242 |
| O | 0.50460805 | 0.26779669 | 0.86754898 |
| O | 0.41880327 | 0.25309993 | 0.94375401 |
| O | 0.15629430 | 0.27345388 | 0.41095983 |
| O | 0.17804498 | 0.32716913 | 0.21807855 |
| O | 0.15226410 | 0.22667859 | 0.79163493 |
| O | 0.18250513 | 0.22744040 | 0.01717063 |
| O | 0.19679794 | 0.20551732 | 0.62770822 |

|   |            |            |            |
|---|------------|------------|------------|
| O | 0.25843409 | 0.35092909 | 0.53943025 |
| O | 0.75260026 | 0.36816908 | 0.53160875 |
| O | 0.73987768 | 0.12090432 | 0.46142538 |
| O | 0.23611775 | 0.10104447 | 0.47228325 |
| O | 0.09295308 | 0.93334273 | 0.27916101 |
| O | 0.08180883 | 0.64643936 | 0.86177522 |
| O | 0.27140765 | 0.81394537 | 0.83928492 |
| O | 0.59631860 | 0.65069440 | 0.26585398 |
| O | 0.60880796 | 0.84678270 | 0.89885215 |
| O | 0.75927975 | 0.60059330 | 0.86052391 |
| O | 0.89679109 | 0.89957796 | 0.74197699 |
| O | 0.89135929 | 0.60910805 | 0.09430517 |
| O | 0.74247868 | 0.85280440 | 0.14442858 |
| O | 0.41892043 | 0.60998638 | 0.79302857 |
| O | 0.40813711 | 0.87367946 | 0.13558697 |
| O | 0.25453187 | 0.65634403 | 0.21415571 |
| O | 0.92540767 | 0.64972784 | 0.76960071 |
| O | 0.92320015 | 0.85825261 | 0.11987818 |
| O | 0.76539424 | 0.60258705 | 0.18240148 |
| O | 0.39953922 | 0.85398701 | 0.72335020 |
| O | 0.39075352 | 0.62862398 | 0.05503573 |
| O | 0.24189958 | 0.90346961 | 0.13897435 |
| O | 0.07921657 | 0.68268460 | 0.23068023 |
| O | 0.10626063 | 0.89914405 | 0.89005650 |
| O | 0.24043870 | 0.56605996 | 0.83842229 |
| O | 0.57149060 | 0.89884152 | 0.21661103 |
| O | 0.57789281 | 0.59827028 | 0.86866077 |
| O | 0.73920692 | 0.84636627 | 0.79170015 |
| O | 0.99421162 | 0.52966968 | 0.13725137 |
| O | 0.07728701 | 0.53062692 | 0.05224651 |
| O | 0.33901227 | 0.52712250 | 0.60338521 |
| O | 0.33265713 | 0.48089911 | 0.81045830 |
| O | 0.35649923 | 0.52712928 | 0.22212223 |
| O | 0.31512513 | 0.44022823 | 0.00940718 |
| O | 0.29854019 | 0.45305012 | 0.38257377 |

|    |            |            |            |
|----|------------|------------|------------|
| O  | 0.49287794 | 0.71844663 | 0.15017083 |
| O  | 0.57062465 | 0.72944949 | 0.04981142 |
| O  | 0.84825372 | 0.72853919 | 0.57742580 |
| O  | 0.82687531 | 0.72219137 | 0.77361055 |
| O  | 0.84686439 | 0.77211610 | 0.20617373 |
| O  | 0.82287822 | 0.79374834 | 0.97984586 |
| O  | 0.79432539 | 0.77411971 | 0.35804726 |
| O  | 0.00280042 | 0.47189192 | 0.84826327 |
| O  | 0.91907383 | 0.48432308 | 0.93242213 |
| O  | 0.65651998 | 0.48405793 | 0.42094593 |
| O  | 0.67678000 | 0.51664527 | 0.22555159 |
| O  | 0.65528298 | 0.51240643 | 0.78485513 |
| O  | 0.67608149 | 0.52957614 | 0.00985852 |
| O  | 0.71069752 | 0.53937857 | 0.63992032 |
| O  | 0.50223413 | 0.78031968 | 0.83835347 |
| O  | 0.42824126 | 0.80549891 | 0.94530759 |
| O  | 0.15507307 | 0.76445696 | 0.42747304 |
| O  | 0.17092249 | 0.80247153 | 0.22710339 |
| O  | 0.16498164 | 0.74937567 | 0.80314829 |
| O  | 0.17381199 | 0.72000411 | 0.02308325 |
| O  | 0.20958671 | 0.70211399 | 0.64329138 |
| O  | 0.25842424 | 0.85202087 | 0.52999814 |
| O  | 0.75809045 | 0.87245241 | 0.52108712 |
| O  | 0.74966854 | 0.61838246 | 0.47472690 |
| O  | 0.23844781 | 0.59872082 | 0.47466890 |
| Al | 0.29507355 | 0.52061209 | 0.25315054 |
| Si | 0.06323143 | 0.03460612 | 0.17644516 |
| Si | 0.06480471 | 0.99953955 | 0.92165415 |
| Si | 0.37232607 | 0.99857765 | 0.71345583 |
| Si | 0.36944724 | 0.00272323 | 0.11618871 |
| Si | 0.28866213 | 0.96797617 | 0.85727414 |
| Si | 0.28141419 | 0.00460579 | 0.23315366 |
| Si | 0.28047822 | 0.98416105 | 0.48570207 |
| Si | 0.56939668 | 0.25103269 | 0.17365252 |
| Si | 0.56995785 | 0.23653773 | 0.92065724 |



|    |            |            |            |
|----|------------|------------|------------|
| Si | 0.87361677 | 0.25310880 | 0.71370960 |
| Si | 0.86605229 | 0.25076684 | 0.10699162 |
| Si | 0.78560937 | 0.24311209 | 0.85207023 |
| Si | 0.78183474 | 0.25254821 | 0.23110192 |
| Si | 0.78050555 | 0.24795604 | 0.48414429 |
| Si | 0.93757025 | 0.00733227 | 0.82520444 |
| Si | 0.93527791 | 0.00612229 | 0.08526608 |
| Si | 0.62426572 | 0.99545741 | 0.27375887 |
| Si | 0.63176826 | 0.99263796 | 0.88827740 |
| Si | 0.71282187 | 0.99369912 | 0.13808483 |
| Si | 0.71405659 | 0.99168041 | 0.75872997 |
| Si | 0.71479225 | 0.99197727 | 0.50400723 |
| Si | 0.43839006 | 0.24547865 | 0.83025649 |
| Si | 0.43756004 | 0.25151302 | 0.08395262 |
| Si | 0.12916948 | 0.29997588 | 0.27445498 |
| Si | 0.12995749 | 0.24985413 | 0.89956740 |
| Si | 0.21627374 | 0.26847281 | 0.14848888 |
| Si | 0.20962784 | 0.19994653 | 0.76524432 |
| Si | 0.21276805 | 0.23358663 | 0.51279676 |
| Si | 0.06042372 | 0.54266196 | 0.16849015 |
| Si | 0.06693940 | 0.51176897 | 0.91521547 |
| Si | 0.37427950 | 0.49498176 | 0.73558100 |
| Si | 0.37290828 | 0.49874961 | 0.10977318 |
| Si | 0.28599048 | 0.45024951 | 0.86796300 |
| Si | 0.28388863 | 0.48142210 | 0.49730401 |
| Si | 0.55774953 | 0.74904705 | 0.16997530 |
| Si | 0.56483138 | 0.73979533 | 0.91430354 |
| Si | 0.87448812 | 0.75030349 | 0.71590817 |
| Si | 0.87123865 | 0.75794600 | 0.10019936 |
| Si | 0.78726630 | 0.74187934 | 0.85177330 |
| Si | 0.78709223 | 0.75025959 | 0.22359074 |
| Si | 0.78731357 | 0.74821426 | 0.48208750 |
| Si | 0.93731224 | 0.50135812 | 0.81816555 |
| Si | 0.93000843 | 0.49541920 | 0.07022953 |
| Si | 0.62852745 | 0.51200755 | 0.28413844 |

|    |            |            |            |
|----|------------|------------|------------|
| Si | 0.62870877 | 0.49677115 | 0.88730157 |
| Si | 0.71360455 | 0.50055147 | 0.14139952 |
| Si | 0.71605064 | 0.50005093 | 0.77082002 |
| Si | 0.71754513 | 0.50258540 | 0.51710659 |
| Si | 0.43733722 | 0.76103046 | 0.82487071 |
| Si | 0.43015930 | 0.75689412 | 0.07256637 |
| Si | 0.12510311 | 0.79404311 | 0.29137972 |
| Si | 0.13210721 | 0.75386258 | 0.89554556 |
| Si | 0.21110692 | 0.76601034 | 0.15258529 |
| Si | 0.22168064 | 0.70895910 | 0.78059835 |
| Si | 0.21572156 | 0.72956711 | 0.51840643 |

### HAl(5)-MTW

a = 25.6509 Å

b = 10.2429 Å

c = 12.248 Å

$\alpha$  = 89.9937°

$\beta$  = 108.736°

$\gamma$  = 90.6083°

|   |            |            |            |
|---|------------|------------|------------|
| H | 0.28371701 | 0.40673570 | 0.04419624 |
| O | 0.07573994 | 0.36205438 | 0.23211063 |
| O | 0.08254892 | 0.13883351 | 0.90293700 |
| O | 0.23061681 | 0.38181132 | 0.80712092 |
| O | 0.60267965 | 0.13862258 | 0.27042615 |
| O | 0.59227025 | 0.40097439 | 0.90561073 |
| O | 0.75215535 | 0.10390866 | 0.84710582 |
| O | 0.89681434 | 0.39021204 | 0.72753012 |
| O | 0.89417430 | 0.10374619 | 0.11091312 |
| O | 0.74030523 | 0.35336540 | 0.14410337 |
| O | 0.40461477 | 0.16067659 | 0.74693857 |
| O | 0.42222771 | 0.37979010 | 0.14873619 |
| O | 0.24977323 | 0.13559631 | 0.19904773 |
| O | 0.92533465 | 0.14127323 | 0.75680651 |
| O | 0.91888590 | 0.35531041 | 0.12185452 |

|   |            |            |            |
|---|------------|------------|------------|
| O | 0.76070586 | 0.10294293 | 0.19464612 |
| O | 0.42379891 | 0.41367132 | 0.77140872 |
| O | 0.40309338 | 0.12737650 | 0.11353440 |
| O | 0.25739944 | 0.38852743 | 0.15280410 |
| O | 0.10549482 | 0.11476852 | 0.23599052 |
| O | 0.10190385 | 0.38814462 | 0.87303002 |
| O | 0.25839284 | 0.13535183 | 0.84977243 |
| O | 0.58344218 | 0.38914855 | 0.22236867 |
| O | 0.59853785 | 0.15048310 | 0.85827614 |
| O | 0.74744243 | 0.35450050 | 0.79301160 |
| O | 0.99975108 | 0.04335654 | 0.15846016 |
| O | 0.06959713 | 0.96174870 | 0.05231795 |
| O | 0.33996065 | 0.02680889 | 0.57457018 |
| O | 0.32957008 | 0.99776370 | 0.78166400 |
| O | 0.34113602 | 0.00516997 | 0.21636636 |
| O | 0.32326962 | 0.96708522 | 0.99337634 |
| O | 0.28557972 | 0.95639411 | 0.36114405 |
| O | 0.50307689 | 0.21691808 | 0.14343794 |
| O | 0.58679413 | 0.22107936 | 0.05820591 |
| O | 0.84045590 | 0.21366746 | 0.57633711 |
| O | 0.83263237 | 0.21345180 | 0.78693081 |
| O | 0.84401666 | 0.26597652 | 0.21294075 |
| O | 0.82003224 | 0.27352092 | 0.98727954 |
| O | 0.78967831 | 0.28493776 | 0.36099545 |
| O | 0.00238242 | 0.96346272 | 0.83601500 |
| O | 0.92973260 | 0.00822231 | 0.94638618 |
| O | 0.65636448 | 0.95352330 | 0.41270536 |
| O | 0.67176182 | 0.98103917 | 0.21172240 |
| O | 0.65543160 | 0.97713153 | 0.78401725 |
| O | 0.68156523 | 0.02594815 | 0.00595396 |
| O | 0.70528414 | 0.02672123 | 0.62985888 |
| O | 0.50423625 | 0.24865337 | 0.86238757 |
| O | 0.42201018 | 0.27009207 | 0.95133344 |
| O | 0.15149586 | 0.26942267 | 0.41726698 |
| O | 0.17554070 | 0.30325096 | 0.22422726 |

|   |            |            |            |
|---|------------|------------|------------|
| O | 0.15237429 | 0.20636250 | 0.79023034 |
| O | 0.18049424 | 0.24265946 | 0.01423979 |
| O | 0.20347386 | 0.20673128 | 0.63430727 |
| O | 0.24906711 | 0.37744981 | 0.53077317 |
| O | 0.75508243 | 0.37151147 | 0.53004999 |
| O | 0.73960607 | 0.12222261 | 0.46303278 |
| O | 0.24138462 | 0.12761488 | 0.46662462 |
| O | 0.07649418 | 0.86925849 | 0.25798221 |
| O | 0.07694282 | 0.63924228 | 0.86753850 |
| O | 0.24277322 | 0.88139397 | 0.81296462 |
| O | 0.59734358 | 0.64215763 | 0.26277862 |
| O | 0.58657037 | 0.90099964 | 0.89796842 |
| O | 0.75530358 | 0.60380848 | 0.85593941 |
| O | 0.89820774 | 0.89084312 | 0.74170488 |
| O | 0.89522236 | 0.60644753 | 0.10880317 |
| O | 0.74368108 | 0.85085055 | 0.14314862 |
| O | 0.39423540 | 0.66054330 | 0.77744439 |
| O | 0.41353911 | 0.87204111 | 0.14839030 |
| O | 0.24670095 | 0.63337507 | 0.21274640 |
| O | 0.92583724 | 0.64007613 | 0.76198626 |
| O | 0.92370383 | 0.85635995 | 0.11880036 |
| O | 0.76794238 | 0.60212104 | 0.19410834 |
| O | 0.41735770 | 0.90420388 | 0.73883408 |
| O | 0.39220115 | 0.63501591 | 0.05067141 |
| O | 0.24445105 | 0.88273966 | 0.14277990 |
| O | 0.09705912 | 0.61502537 | 0.25084686 |
| O | 0.10658423 | 0.88988506 | 0.88424214 |
| O | 0.26058678 | 0.62928832 | 0.85963487 |
| O | 0.57566826 | 0.89126606 | 0.21778205 |
| O | 0.59718170 | 0.65099628 | 0.85955518 |
| O | 0.74696276 | 0.85240618 | 0.79331457 |
| O | 0.99695738 | 0.53159044 | 0.13517380 |
| O | 0.07918665 | 0.49540196 | 0.04935947 |
| O | 0.34175618 | 0.51315919 | 0.59831017 |
| O | 0.32874440 | 0.46686429 | 0.80162491 |

|    |             |             |            |
|----|-------------|-------------|------------|
| O  | 0.34555548  | 0.53755466  | 0.22441349 |
| O  | 0.31006486  | 0.43839568  | 0.00218713 |
| O  | 0.29442495  | 0.46059703  | 0.37493115 |
| O  | 0.49551729  | 0.71606751  | 0.14849070 |
| O  | 0.57364356  | 0.72509626  | 0.04708007 |
| O  | 0.84638901  | 0.72398504  | 0.57682564 |
| O  | 0.83025705  | 0.71044199  | 0.77924946 |
| O  | 0.84819674  | 0.77396420  | 0.21123465 |
| O  | 0.82439719  | 0.78132830  | 0.98409143 |
| O  | 0.79375025  | 0.78439313  | 0.36049942 |
| O  | -0.00031075 | 0.45808180  | 0.84847415 |
| O  | 0.91771384  | 0.49108308  | 0.93556210 |
| O  | 0.65709656  | 0.47416076  | 0.41667347 |
| O  | 0.67606425  | 0.50641557  | 0.21909673 |
| O  | 0.65755085  | 0.48428841  | 0.78769062 |
| O  | 0.68338428  | 0.53913051  | 0.00983379 |
| O  | 0.70858362  | 0.53674629  | 0.63544938 |
| O  | 0.49882442  | 0.74225631  | 0.83750068 |
| O  | 0.43324044  | 0.82590665  | 0.95305858 |
| O  | 0.15466019  | 0.75890451  | 0.42854531 |
| O  | 0.16813970  | 0.79275398  | 0.22383157 |
| O  | 0.15861737  | 0.72134152  | 0.79516527 |
| O  | 0.17252462  | 0.71041383  | 0.01923685 |
| O  | 0.21151939  | 0.70238291  | 0.64463208 |
| O  | 0.25006926  | 0.88010497  | 0.53306017 |
| O  | 0.75844024  | 0.87411247  | 0.52773522 |
| O  | 0.74672089  | 0.62238657  | 0.47012129 |
| O  | 0.24835054  | 0.62901933  | 0.47648315 |
| Al | 0.37488221  | 0.50278599  | 0.11851543 |
| Si | 0.06254694  | -0.00182327 | 0.1762763  |
| Si | 0.06525718  | 0.98858760  | 0.91877029 |
| Si | 0.37314236  | 0.02215324  | 0.71204631 |
| Si | 0.37093783  | 0.99304498  | 0.11752333 |
| Si | 0.28935663  | 0.99505364  | 0.85987438 |
| Si | 0.28042506  | 0.99569561  | 0.22957587 |

|    |            |            |            |
|----|------------|------------|------------|
| Si | 0.27920507 | 0.99779041 | 0.48388706 |
| Si | 0.56841599 | 0.24170038 | 0.17332642 |
| Si | 0.57042967 | 0.25555375 | 0.92107600 |
| Si | 0.87357093 | 0.24049412 | 0.71189291 |
| Si | 0.86933714 | 0.24947844 | 0.10796188 |
| Si | 0.78798636 | 0.23698948 | 0.85336187 |
| Si | 0.78328005 | 0.25116269 | 0.22784775 |
| Si | 0.78085170 | 0.24786697 | 0.48249765 |
| Si | 0.93894067 | 0.00062434 | 0.82107480 |
| Si | 0.93667137 | 0.00329748 | 0.08314684 |
| Si | 0.62639663 | 0.99110903 | 0.27773394 |
| Si | 0.63028088 | 0.01175657 | 0.88678653 |
| Si | 0.71418536 | 0.99147139 | 0.13905973 |
| Si | 0.71507023 | 0.98996909 | 0.76391943 |
| Si | 0.71503427 | 0.99344650 | 0.50846322 |
| Si | 0.43917163 | 0.27245616 | 0.83491809 |
| Si | 0.43796375 | 0.25175734 | 0.09149721 |
| Si | 0.12669583 | 0.26165638 | 0.27723897 |
| Si | 0.12883633 | 0.24394638 | 0.89487734 |
| Si | 0.21507209 | 0.26491491 | 0.14890620 |
| Si | 0.21132830 | 0.23095214 | 0.76927196 |
| Si | 0.21176809 | 0.24537996 | 0.51241565 |
| Si | 0.06188800 | 0.50166916 | 0.16616134 |
| Si | 0.06410899 | 0.49518245 | 0.90951081 |
| Si | 0.37270356 | 0.51425033 | 0.73707270 |
| Si | 0.28202328 | 0.48107738 | 0.86215559 |
| Si | 0.28800007 | 0.50966030 | 0.24477591 |
| Si | 0.28349634 | 0.49499759 | 0.49523825 |
| Si | 0.56021063 | 0.74354709 | 0.16804575 |
| Si | 0.56392791 | 0.75525340 | 0.91116730 |
| Si | 0.87525139 | 0.74225926 | 0.71501630 |
| Si | 0.87287268 | 0.75440553 | 0.10558173 |
| Si | 0.78926001 | 0.73800581 | 0.85349861 |
| Si | 0.78807231 | 0.75227496 | 0.22755341 |
| Si | 0.78587575 | 0.75085051 | 0.48347450 |

|    |            |            |            |
|----|------------|------------|------------|
| Si | 0.93516248 | 0.49496845 | 0.81877954 |
| Si | 0.93216730 | 0.49617190 | 0.07517190 |
| Si | 0.62835557 | 0.50265134 | 0.27959700 |
| Si | 0.63251214 | 0.51776673 | 0.89083110 |
| Si | 0.71665130 | 0.50072622 | 0.14187692 |
| Si | 0.71730215 | 0.49451360 | 0.76806779 |
| Si | 0.71698246 | 0.50092259 | 0.51306511 |
| Si | 0.43632506 | 0.78224539 | 0.82731158 |
| Si | 0.43286840 | 0.75949395 | 0.07524078 |
| Si | 0.12393278 | 0.75810272 | 0.28997610 |
| Si | 0.12871971 | 0.74094722 | 0.89231089 |
| Si | 0.20819839 | 0.75341796 | 0.14991345 |
| Si | 0.21851985 | 0.73552286 | 0.77793943 |
| Si | 0.21625639 | 0.74315737 | 0.52023897 |

### HAl(6)-MTW

a = 25.5246 Å

b = 10.199 Å

c = 12.2738 Å

$\alpha$  = 88.9321°

$\beta$  = 109.009°

$\gamma$  = 90.3503°

|   |            |            |            |
|---|------------|------------|------------|
| H | 0.37816051 | 0.28465235 | 0.19495786 |
| O | 0.08111406 | 0.33740957 | 0.22416961 |
| O | 0.07733310 | 0.17297155 | 0.88089807 |
| O | 0.23613305 | 0.41250224 | 0.81056916 |
| O | 0.58291678 | 0.09226429 | 0.22225306 |
| O | 0.57965080 | 0.42751370 | 0.88412776 |
| O | 0.75923542 | 0.07098066 | 0.85812927 |
| O | 0.91725250 | 0.33341570 | 0.78334318 |
| O | 0.89769750 | 0.09044689 | 0.12899887 |
| O | 0.73883540 | 0.34423224 | 0.14712832 |
| O | 0.39896137 | 0.18246209 | 0.73271389 |
| O | 0.39565592 | 0.33966634 | 0.14899844 |

|   |            |             |            |
|---|------------|-------------|------------|
| O | 0.23829520 | 0.08884472  | 0.14819834 |
| O | 0.89709323 | 0.08499654  | 0.72749837 |
| O | 0.92129039 | 0.34023543  | 0.11858194 |
| O | 0.76488350 | 0.09305610  | 0.17761437 |
| O | 0.42344116 | 0.43334363  | 0.76182957 |
| O | 0.41711641 | 0.08571093  | 0.10778909 |
| O | 0.26653424 | 0.34029725  | 0.17355549 |
| O | 0.10601915 | 0.08557860  | 0.25898414 |
| O | 0.09967204 | 0.42358876  | 0.86222211 |
| O | 0.25786208 | 0.16158999  | 0.86343562 |
| O | 0.61194371 | 0.33946640  | 0.26808483 |
| O | 0.60025641 | 0.17669814  | 0.86236353 |
| O | 0.73246668 | 0.32211558  | 0.81680521 |
| O | 0.00085635 | 0.02797580  | 0.14344840 |
| O | 0.07992269 | 0.99790836  | 0.04674790 |
| O | 0.34501959 | 0.00339159  | 0.58467127 |
| O | 0.32406650 | 0.02717715  | 0.77930830 |
| O | 0.34490357 | 0.01706273  | 0.21193514 |
| O | 0.32021455 | 0.97125877  | 0.98997361 |
| O | 0.29102398 | 0.00299187  | 0.36204240 |
| O | 0.50647107 | 0.27727837  | 0.15294833 |
| O | 0.58581034 | 0.25682051  | 0.05444677 |
| O | 0.84291633 | 0.26942875  | 0.58032294 |
| O | 0.81951339 | 0.22967178  | 0.77163933 |
| O | 0.84529420 | 0.26637536  | 0.21352324 |
| O | 0.82273921 | 0.25282361  | 0.98840200 |
| O | 0.78896937 | 0.25196475  | 0.35895304 |
| O | 0.99828131 | -0.00229202 | 0.84553647 |
| O | 0.91919163 | 0.00967770  | 0.94413424 |
| O | 0.65673487 | 0.01451711  | 0.42221389 |
| O | 0.68060394 | -0.00723062 | 0.23070551 |
| O | 0.65282403 | 0.99538761  | 0.78629700 |
| O | 0.67418614 | 0.02010443  | 0.01070219 |
| O | 0.71116539 | 0.98928874  | 0.64432133 |
| O | 0.50005635 | 0.25276376  | 0.85777330 |



|   |            |            |            |
|---|------------|------------|------------|
| O | 0.41570677 | 0.28918391 | 0.93899887 |
| O | 0.15629837 | 0.25272443 | 0.42145937 |
| O | 0.18050782 | 0.25654987 | 0.22886925 |
| O | 0.15310091 | 0.24672226 | 0.78419753 |
| O | 0.17484081 | 0.26852911 | 0.00891000 |
| O | 0.21176006 | 0.23464656 | 0.64334016 |
| O | 0.23812565 | 0.42039361 | 0.51591600 |
| O | 0.73627372 | 0.34066530 | 0.49743839 |
| O | 0.76335316 | 0.09055462 | 0.50724475 |
| O | 0.26220715 | 0.17254136 | 0.49288624 |
| O | 0.07473231 | 0.83851376 | 0.21755447 |
| O | 0.08067495 | 0.67375606 | 0.88697972 |
| O | 0.23534114 | 0.91455753 | 0.80477036 |
| O | 0.58198818 | 0.58829284 | 0.22219189 |
| O | 0.57617461 | 0.92737198 | 0.88254171 |
| O | 0.76193959 | 0.56970851 | 0.86204976 |
| O | 0.91590196 | 0.83286108 | 0.78397484 |
| O | 0.90066542 | 0.59252190 | 0.13243092 |
| O | 0.74085808 | 0.84186533 | 0.14294145 |
| O | 0.39481049 | 0.68456258 | 0.73295628 |
| O | 0.39934113 | 0.83263451 | 0.14013908 |
| O | 0.23366022 | 0.59045817 | 0.14774094 |
| O | 0.89668342 | 0.58448784 | 0.72970807 |
| O | 0.92486564 | 0.84222598 | 0.11774907 |
| O | 0.76977506 | 0.59275612 | 0.17676424 |
| O | 0.42126679 | 0.93118065 | 0.78494960 |
| O | 0.41952273 | 0.58471042 | 0.11444670 |
| O | 0.26615846 | 0.83804127 | 0.18599923 |
| O | 0.10370169 | 0.58859017 | 0.26280490 |
| O | 0.10020356 | 0.92398045 | 0.85867725 |
| O | 0.26021532 | 0.66351466 | 0.85033530 |
| O | 0.60238288 | 0.84001726 | 0.26766296 |
| O | 0.60032520 | 0.67845654 | 0.86561743 |
| O | 0.73326735 | 0.82035740 | 0.82307952 |
| O | 0.00138772 | 0.51357683 | 0.14634107 |

|    |            |             |            |
|----|------------|-------------|------------|
| O  | 0.08115981 | 0.49912874  | 0.05114296 |
| O  | 0.34175981 | 0.51410923  | 0.57564539 |
| O  | 0.32626412 | 0.50981324  | 0.77774040 |
| O  | 0.34133333 | 0.52553472  | 0.21365823 |
| O  | 0.32086726 | 0.48478476  | 0.99003438 |
| O  | 0.28439615 | 0.48915744  | 0.35773971 |
| O  | 0.50082696 | 0.75861502  | 0.14928746 |
| O  | 0.58118671 | 0.75856002  | 0.05413765 |
| O  | 0.84414061 | 0.76864380  | 0.57886621 |
| O  | 0.81746496 | 0.73079272  | 0.76659452 |
| O  | 0.84814562 | 0.77159333  | 0.21234663 |
| O  | 0.82687220 | 0.75328016  | 0.98732389 |
| O  | 0.79119034 | 0.75423204  | 0.35672492 |
| O  | 0.99878667 | 0.50400202  | 0.84990502 |
| O  | 0.91910890 | 0.50603398  | 0.94615912 |
| O  | 0.65796930 | 0.52123713  | 0.42272163 |
| O  | 0.68324164 | 0.51469330  | 0.23177850 |
| O  | 0.65454616 | 0.50337795  | 0.78646773 |
| O  | 0.67692705 | 0.52677533  | 0.01133987 |
| O  | 0.71311742 | 0.50007023  | 0.64503523 |
| O  | 0.49839420 | 0.74686049  | 0.85559086 |
| O  | 0.41783771 | 0.75864148  | 0.94914252 |
| O  | 0.15234542 | 0.76761818  | 0.41529299 |
| O  | 0.17374935 | 0.76132349  | 0.21912283 |
| O  | 0.15426963 | 0.74404570  | 0.78302980 |
| O  | 0.17859016 | 0.77798648  | 0.00629068 |
| O  | 0.20956752 | 0.74008310  | 0.63492610 |
| O  | 0.23944504 | 0.92156394  | 0.50818735 |
| O  | 0.73724993 | 0.83918886  | 0.49421293 |
| O  | 0.76536378 | 0.58975080  | 0.50326174 |
| O  | 0.25506820 | 0.67047041  | 0.47806840 |
| Al | 0.43879038 | 0.23912027  | 0.08145623 |
| Si | 0.06494367 | -0.01203870 | 0.1660331  |
| Si | 0.06363797 | 0.02252905  | 0.90788153 |
| Si | 0.37276725 | 0.03651482  | 0.72122240 |

|    |            |             |            |
|----|------------|-------------|------------|
| Si | 0.37164202 | 0.97890867  | 0.11128989 |
| Si | 0.28518733 | 0.01817032  | 0.86022241 |
| Si | 0.28496665 | 0.98673154  | 0.22784866 |
| Si | 0.28447343 | 0.02419868  | 0.48723341 |
| Si | 0.57018237 | 0.24285739  | 0.17374450 |
| Si | 0.56599178 | 0.27821217  | 0.91505937 |
| Si | 0.86929495 | 0.23000235  | 0.71635536 |
| Si | 0.87150203 | 0.23737890  | 0.11196919 |
| Si | 0.78375007 | 0.21864169  | 0.85914475 |
| Si | 0.78422035 | 0.23923582  | 0.22512707 |
| Si | 0.78253181 | 0.23829988  | 0.48520217 |
| Si | 0.93272894 | -0.01835569 | 0.8254956  |
| Si | 0.93563785 | -0.00760667 | 0.0838278  |
| Si | 0.63029247 | -0.01455265 | 0.2848510  |
| Si | 0.62602625 | 0.02965477  | 0.88594976 |
| Si | 0.71453311 | -0.01273656 | 0.1398033  |
| Si | 0.71404491 | 0.96896193  | 0.77716422 |
| Si | 0.71727116 | 0.98414373  | 0.51746722 |
| Si | 0.43472725 | 0.28910848  | 0.82593722 |
| Si | 0.13064889 | 0.23324914  | 0.28302056 |
| Si | 0.12616684 | 0.27726835  | 0.88429825 |
| Si | 0.21428925 | 0.23730596  | 0.13878849 |
| Si | 0.21497442 | 0.26371449  | 0.77467051 |
| Si | 0.21719019 | 0.26960365  | 0.51834032 |
| Si | 0.06642724 | 0.48469448  | 0.17046399 |
| Si | 0.06454804 | 0.52475837  | 0.91236571 |
| Si | 0.37211163 | 0.53466576  | 0.71313174 |
| Si | 0.36800716 | 0.49296566  | 0.11387823 |
| Si | 0.28609664 | 0.51754001  | 0.85544504 |
| Si | 0.28038907 | 0.48823019  | 0.22428462 |
| Si | 0.27973942 | 0.52319860  | 0.48262823 |
| Si | 0.56665503 | 0.73684903  | 0.17307297 |
| Si | 0.56402531 | 0.77755519  | 0.91455200 |
| Si | 0.86862576 | 0.72941589  | 0.71523518 |
| Si | 0.87490845 | 0.73971536  | 0.11213315 |

|    |            |            |            |
|----|------------|------------|------------|
| Si | 0.78519267 | 0.71852448 | 0.86058729 |
| Si | 0.78726144 | 0.74055643 | 0.22335907 |
| Si | 0.78407439 | 0.73838025 | 0.48230165 |
| Si | 0.93319979 | 0.48203160 | 0.82748938 |
| Si | 0.93556062 | 0.48791142 | 0.08580924 |
| Si | 0.63330993 | 0.49004413 | 0.28547642 |
| Si | 0.62804595 | 0.53311494 | 0.88746252 |
| Si | 0.71667939 | 0.49414191 | 0.14109047 |
| Si | 0.71542159 | 0.47339555 | 0.77692809 |
| Si | 0.71835312 | 0.48860200 | 0.51782207 |
| Si | 0.43360160 | 0.78054909 | 0.83107159 |
| Si | 0.43523999 | 0.73601315 | 0.08816210 |
| Si | 0.12586672 | 0.73878404 | 0.27845861 |
| Si | 0.12825231 | 0.77903918 | 0.88382965 |
| Si | 0.21255572 | 0.74231441 | 0.13919063 |
| Si | 0.21490514 | 0.76602516 | 0.76791867 |
| Si | 0.21430045 | 0.77511510 | 0.50941381 |

### HAl(7)-MTW

a = 25.5009 Å

b = 10.1966 Å

c = 12.2732 Å

$\alpha$  = 88.5221°

$\beta$  = 108.892°

$\gamma$  = 90.099°

|   |            |            |            |
|---|------------|------------|------------|
| H | 0.26745117 | 0.08695001 | 0.07635646 |
| O | 0.10408520 | 0.36961778 | 0.24569651 |
| O | 0.07765448 | 0.20065256 | 0.88015890 |
| O | 0.26282749 | 0.35124933 | 0.86328986 |
| O | 0.57523184 | 0.09922175 | 0.21875568 |
| O | 0.57910376 | 0.40929911 | 0.86867793 |
| O | 0.76466399 | 0.07493986 | 0.81315616 |
| O | 0.92432948 | 0.35354430 | 0.76838590 |
| O | 0.91962450 | 0.13884184 | 0.12256429 |

|   |            |            |            |
|---|------------|------------|------------|
| O | 0.76307753 | 0.39637529 | 0.19441134 |
| O | 0.40312398 | 0.14773886 | 0.72942052 |
| O | 0.39162938 | 0.34428368 | 0.10793379 |
| O | 0.25511011 | 0.09241061 | 0.14669992 |
| O | 0.89714231 | 0.10512280 | 0.72728035 |
| O | 0.89240944 | 0.38992970 | 0.10398732 |
| O | 0.74051879 | 0.14803858 | 0.14641863 |
| O | 0.42302837 | 0.39908931 | 0.76843124 |
| O | 0.41796110 | 0.09298126 | 0.12235735 |
| O | 0.26234869 | 0.35388266 | 0.22037160 |
| O | 0.07647636 | 0.12089376 | 0.25825850 |
| O | 0.10524786 | 0.45003337 | 0.87348923 |
| O | 0.23780253 | 0.10476959 | 0.80936446 |
| O | 0.59581717 | 0.35084738 | 0.26860116 |
| O | 0.60825768 | 0.15847769 | 0.89231743 |
| O | 0.73484768 | 0.32333861 | 0.82240272 |
| O | 0.99717917 | 0.95923343 | 0.14036919 |
| O | 0.07516367 | 0.03865947 | 0.05301699 |
| O | 0.33892126 | 0.97044997 | 0.59622230 |
| O | 0.33547312 | 0.00646619 | 0.80929074 |
| O | 0.35179192 | 0.97569978 | 0.22668308 |
| O | 0.31265804 | 0.03003184 | 0.00525463 |
| O | 0.29733656 | 0.03486946 | 0.37378334 |
| O | 0.49548577 | 0.27410421 | 0.14150215 |
| O | 0.57967202 | 0.27363472 | 0.05662183 |
| O | 0.84056807 | 0.28711880 | 0.57999495 |
| O | 0.82959734 | 0.27041974 | 0.78729932 |
| O | 0.84581713 | 0.22795439 | 0.21634191 |
| O | 0.81811957 | 0.21522708 | 0.99111010 |
| O | 0.79087079 | 0.21336206 | 0.36404864 |
| O | 0.00003800 | 0.02214535 | 0.84462773 |
| O | 0.91883698 | 0.00800444 | 0.93786513 |
| O | 0.65472290 | 0.02973993 | 0.41144546 |
| O | 0.67048551 | 0.00057074 | 0.21051619 |
| O | 0.65839265 | 0.01188654 | 0.78108770 |

|   |            |            |            |
|---|------------|------------|------------|
| O | 0.68073600 | 0.97205631 | 0.00473484 |
| O | 0.70537482 | 0.95084799 | 0.62655544 |
| O | 0.50343549 | 0.22517042 | 0.85538102 |
| O | 0.41867998 | 0.23518506 | 0.93847837 |
| O | 0.15435777 | 0.22748245 | 0.43435524 |
| O | 0.17611439 | 0.18017418 | 0.24204507 |
| O | 0.15615083 | 0.27382616 | 0.79042858 |
| O | 0.17692105 | 0.27788436 | 0.01590236 |
| O | 0.21285772 | 0.29331237 | 0.64559527 |
| O | 0.23588294 | 0.40152572 | 0.46828478 |
| O | 0.74135322 | 0.38180521 | 0.45834948 |
| O | 0.75292448 | 0.13072839 | 0.53094191 |
| O | 0.26100248 | 0.15191296 | 0.52752397 |
| O | 0.09959608 | 0.87360512 | 0.23343450 |
| O | 0.08499700 | 0.69819664 | 0.91061158 |
| O | 0.26151321 | 0.85141227 | 0.85509842 |
| O | 0.57409383 | 0.60082158 | 0.21050300 |
| O | 0.58160732 | 0.90762540 | 0.86231312 |
| O | 0.76046093 | 0.57485321 | 0.81531542 |
| O | 0.92044477 | 0.85271847 | 0.76630980 |
| O | 0.92246352 | 0.63744128 | 0.12611360 |
| O | 0.76265613 | 0.89469038 | 0.19050553 |
| O | 0.40208530 | 0.64951571 | 0.72217538 |
| O | 0.38949710 | 0.84283748 | 0.08221216 |
| O | 0.24705707 | 0.60363202 | 0.14073994 |
| O | 0.89629623 | 0.60190709 | 0.73204228 |
| O | 0.89345290 | 0.88789411 | 0.10777114 |
| O | 0.73811861 | 0.64700837 | 0.14136214 |
| O | 0.42366073 | 0.89654198 | 0.78008779 |
| O | 0.42305277 | 0.59442000 | 0.13196075 |
| O | 0.26045769 | 0.84315461 | 0.22598190 |
| O | 0.07817839 | 0.62000125 | 0.24852664 |
| O | 0.10468623 | 0.94917149 | 0.87997673 |
| O | 0.23896025 | 0.60233965 | 0.80825301 |
| O | 0.59856117 | 0.84822017 | 0.26670290 |

|    |            |            |            |
|----|------------|------------|------------|
| O  | 0.61145681 | 0.65695163 | 0.89804737 |
| O  | 0.73586626 | 0.82658472 | 0.83064168 |
| O  | 0.99887393 | 0.44994376 | 0.15502973 |
| O  | 0.07294590 | 0.50863864 | 0.05124108 |
| O  | 0.33956053 | 0.47565673 | 0.58156568 |
| O  | 0.33110782 | 0.49951499 | 0.78942738 |
| O  | 0.34843233 | 0.50502830 | 0.22331950 |
| O  | 0.32260356 | 0.53465512 | 0.99561674 |
| O  | 0.29203051 | 0.55316125 | 0.36483445 |
| O  | 0.49597995 | 0.78383090 | 0.14430074 |
| O  | 0.57556044 | 0.77979166 | 0.04852082 |
| O  | 0.84239670 | 0.77786094 | 0.57435281 |
| O  | 0.82373814 | 0.76620225 | 0.77415727 |
| O  | 0.84421728 | 0.72236875 | 0.21071772 |
| O  | 0.82261236 | 0.71090428 | 0.98645984 |
| O  | 0.78941884 | 0.71050769 | 0.35861581 |
| O  | 0.00196486 | 0.53405913 | 0.83735666 |
| O  | 0.92749684 | 0.50598239 | 0.94555820 |
| O  | 0.65333443 | 0.53516248 | 0.40671398 |
| O  | 0.66862651 | 0.49648015 | 0.20655396 |
| O  | 0.65489313 | 0.50271921 | 0.77899643 |
| O  | 0.68149524 | 0.46390175 | 0.00357384 |
| O  | 0.70244194 | 0.45722777 | 0.62322831 |
| O  | 0.50544073 | 0.72342567 | 0.83990572 |
| O  | 0.42713754 | 0.71103253 | 0.93988195 |
| O  | 0.15352112 | 0.73240070 | 0.42240972 |
| O  | 0.17366800 | 0.69813985 | 0.22614748 |
| O  | 0.15761684 | 0.76732493 | 0.80480718 |
| O  | 0.18238780 | 0.80281239 | 0.02924986 |
| O  | 0.20385381 | 0.78575367 | 0.64141225 |
| O  | 0.23603083 | 0.90145176 | 0.47705374 |
| O  | 0.74443483 | 0.88331613 | 0.45912503 |
| O  | 0.75224640 | 0.63062354 | 0.52707244 |
| O  | 0.25777807 | 0.64886363 | 0.53021111 |
| Al | 0.21319862 | 0.23983980 | 0.15670225 |

|    |            |             |            |
|----|------------|-------------|------------|
| Si | 0.06202762 | 0.99868815  | 0.17093544 |
| Si | 0.06435676 | 0.05269082  | 0.91489080 |
| Si | 0.37487213 | 0.00473511  | 0.72786519 |
| Si | 0.37014811 | 0.98465099  | 0.11051097 |
| Si | 0.28653607 | 0.99832078  | 0.86602406 |
| Si | 0.29212434 | 0.98101708  | 0.24888760 |
| Si | 0.28251720 | 0.01477797  | 0.49352686 |
| Si | 0.56152726 | 0.24943377  | 0.17120862 |
| Si | 0.56752318 | 0.26624685  | 0.91806860 |
| Si | 0.87292756 | 0.25392351  | 0.71578488 |
| Si | 0.86930472 | 0.24260142  | 0.10801604 |
| Si | 0.78689090 | 0.22092623  | 0.85321835 |
| Si | 0.78499273 | 0.24662001  | 0.23049354 |
| Si | 0.78152566 | 0.25314084  | 0.48346047 |
| Si | 0.93464838 | -0.00244893 | 0.8198639  |
| Si | 0.93260368 | -0.00196775 | 0.0771211  |
| Si | 0.62511253 | 0.99459367  | 0.27704652 |
| Si | 0.63205899 | 0.01281584  | 0.88535619 |
| Si | 0.71362791 | 0.00278205  | 0.13852380 |
| Si | 0.71630888 | 0.96709939  | 0.76329725 |
| Si | 0.71494907 | 0.99921161  | 0.50783769 |
| Si | 0.43748705 | 0.25224887  | 0.82362032 |
| Si | 0.43128266 | 0.23765724  | 0.07726661 |
| Si | 0.12824674 | 0.22389433  | 0.29340823 |
| Si | 0.12989816 | 0.30008333  | 0.89343357 |
| Si | 0.21673411 | 0.25660370  | 0.77691650 |
| Si | 0.21557166 | 0.26807064  | 0.51787866 |
| Si | 0.06357461 | 0.48599034  | 0.17521516 |
| Si | 0.06627936 | 0.54642294  | 0.91800005 |
| Si | 0.37338634 | 0.50569328  | 0.71513700 |
| Si | 0.37130640 | 0.49392197  | 0.11515832 |
| Si | 0.28893734 | 0.49737244  | 0.86385590 |
| Si | 0.28662253 | 0.49889888  | 0.23728556 |
| Si | 0.28086395 | 0.51907552  | 0.48498716 |
| Si | 0.56132737 | 0.75288877  | 0.16730876 |



|    |            |            |            |
|----|------------|------------|------------|
| Si | 0.56837889 | 0.76651872 | 0.91227298 |
| Si | 0.87086010 | 0.74950767 | 0.71214017 |
| Si | 0.87095625 | 0.73923303 | 0.10732096 |
| Si | 0.78574012 | 0.71924980 | 0.85161513 |
| Si | 0.78362221 | 0.74409266 | 0.22516831 |
| Si | 0.78205330 | 0.75062298 | 0.47965067 |
| Si | 0.93804561 | 0.49891272 | 0.82198158 |
| Si | 0.93579372 | 0.49535345 | 0.08269803 |
| Si | 0.62331524 | 0.49589829 | 0.27337923 |
| Si | 0.63143548 | 0.50848567 | 0.88724605 |
| Si | 0.71284255 | 0.49997655 | 0.13708102 |
| Si | 0.71349832 | 0.46549613 | 0.76052618 |
| Si | 0.71284487 | 0.50171699 | 0.50456822 |
| Si | 0.43993626 | 0.74500142 | 0.82044544 |
| Si | 0.43424679 | 0.73247418 | 0.07461255 |
| Si | 0.12567867 | 0.73176394 | 0.28262758 |
| Si | 0.13214726 | 0.80345208 | 0.90604767 |
| Si | 0.21511961 | 0.73643882 | 0.15440131 |
| Si | 0.21519403 | 0.75082760 | 0.77691244 |
| Si | 0.21280064 | 0.76594923 | 0.51782787 |

### HGa(1)-MTW

a = 25.3898 Å

b = 10.2047 Å

c = 12.3505 Å

$\alpha$  = 89.1683°

$\beta$  = 108.947°

$\gamma$  = 90.2757°

|   |            |            |            |
|---|------------|------------|------------|
| H | 0.46482578 | 0.00952131 | 0.77877705 |
| O | 0.07814313 | 0.33697200 | 0.22611981 |
| O | 0.10377359 | 0.09196238 | 0.87848247 |
| O | 0.26081997 | 0.34363900 | 0.85365147 |
| O | 0.58060745 | 0.09826981 | 0.21791821 |
| O | 0.57975459 | 0.42530357 | 0.88085599 |
| O | 0.73555460 | 0.17752301 | 0.81906614 |
| O | 0.92331870 | 0.34210687 | 0.76597497 |
| O | 0.89427686 | 0.08397724 | 0.12482737 |
| O | 0.76446845 | 0.43464433 | 0.16680381 |
| O | 0.42811627 | 0.04557298 | 0.77521829 |
| O | 0.39709638 | 0.33990295 | 0.13533627 |
| O | 0.26853379 | 0.18016709 | 0.18256236 |
| O | 0.89403439 | 0.09339137 | 0.73387845 |
| O | 0.92362637 | 0.33260292 | 0.12349074 |
| O | 0.73797028 | 0.18263471 | 0.14760717 |
| O | 0.38799060 | 0.32063772 | 0.71363563 |
| O | 0.42264025 | 0.08920968 | 0.13939252 |
| O | 0.23628218 | 0.42945883 | 0.15430775 |
| O | 0.10252710 | 0.08549686 | 0.25867473 |
| O | 0.07999034 | 0.34240920 | 0.88111810 |
| O | 0.23608297 | 0.09481161 | 0.81013140 |
| O | 0.60168504 | 0.34877172 | 0.26784739 |
| O | 0.61465209 | 0.17914807 | 0.88894838 |
| O | 0.76100360 | 0.42963519 | 0.84333355 |
| O | 0.99801410 | 0.01775572 | 0.14402471 |
| O | 0.07869294 | 0.98329384 | 0.05201326 |
| O | 0.34432202 | 0.99411492 | 0.58296299 |

|   |            |            |            |
|---|------------|------------|------------|
| O | 0.32885528 | 0.00569591 | 0.78520947 |
| O | 0.34333612 | 0.98928643 | 0.21524387 |
| O | 0.32197542 | 0.02953118 | 0.99394479 |
| O | 0.29033785 | 0.02071221 | 0.36378580 |
| O | 0.49930643 | 0.27072533 | 0.14815204 |
| O | 0.58125727 | 0.27156714 | 0.05558310 |
| O | 0.84263801 | 0.27021456 | 0.57547749 |
| O | 0.82426195 | 0.26636751 | 0.77383053 |
| O | 0.84482881 | 0.25897321 | 0.21315649 |
| O | 0.82360876 | 0.25687141 | 0.98886951 |
| O | 0.78698735 | 0.28298904 | 0.35459408 |
| O | 0.99882087 | 0.03049809 | 0.85409627 |
| O | 0.91702834 | 0.99758327 | 0.94417039 |
| O | 0.65429512 | 0.01607122 | 0.41563210 |
| O | 0.68091675 | 0.00905430 | 0.22732440 |
| O | 0.65733819 | 0.99767224 | 0.78847432 |
| O | 0.68066098 | 0.99280021 | 0.01312288 |
| O | 0.70909654 | 0.02607611 | 0.63543909 |
| O | 0.50819167 | 0.22695367 | 0.84615926 |
| O | 0.41373482 | 0.23638447 | 0.95383742 |
| O | 0.15608425 | 0.25426925 | 0.41782001 |
| O | 0.17635699 | 0.25065955 | 0.22159182 |
| O | 0.15446852 | 0.26462666 | 0.78439819 |
| O | 0.17979966 | 0.25293948 | 0.00905388 |
| O | 0.21053536 | 0.27150401 | 0.63838966 |
| O | 0.26037961 | 0.34730749 | 0.48850233 |
| O | 0.73672337 | 0.35465906 | 0.50289124 |
| O | 0.75930966 | 0.10496403 | 0.48642136 |
| O | 0.24177155 | 0.09573826 | 0.51487110 |
| O | 0.07456336 | 0.83604178 | 0.22851036 |
| O | 0.10303750 | 0.59445428 | 0.87336275 |
| O | 0.26392355 | 0.84563901 | 0.85693381 |
| O | 0.57804953 | 0.59796413 | 0.21474559 |
| O | 0.57834877 | 0.93228610 | 0.87853112 |
| O | 0.73309090 | 0.68032158 | 0.81587127 |

|   |            |            |            |
|---|------------|------------|------------|
| O | 0.92416612 | 0.84459355 | 0.77669833 |
| O | 0.89656978 | 0.58295628 | 0.12051851 |
| O | 0.77180463 | 0.93522731 | 0.18340529 |
| O | 0.42606967 | 0.56358808 | 0.77252034 |
| O | 0.39224021 | 0.84075985 | 0.10100916 |
| O | 0.26178074 | 0.68214431 | 0.17324960 |
| O | 0.89927616 | 0.59367186 | 0.73775511 |
| O | 0.92043047 | 0.83440760 | 0.11725128 |
| O | 0.73849100 | 0.68720314 | 0.16277886 |
| O | 0.38682610 | 0.80489401 | 0.73751532 |
| O | 0.42291572 | 0.59200441 | 0.13926657 |
| O | 0.23406679 | 0.93380502 | 0.15639009 |
| O | 0.10287621 | 0.58696302 | 0.26558586 |
| O | 0.07385161 | 0.84416113 | 0.86730325 |
| O | 0.23873746 | 0.59634426 | 0.82205097 |
| O | 0.60380150 | 0.84708920 | 0.25401448 |
| O | 0.59653418 | 0.67804988 | 0.85867787 |
| O | 0.76495472 | 0.92839132 | 0.84209083 |
| O | 0.00020683 | 0.51590761 | 0.13997687 |
| O | 0.08447213 | 0.49548194 | 0.05709126 |
| O | 0.34132796 | 0.52156839 | 0.57913082 |
| O | 0.32657772 | 0.50098121 | 0.78011755 |
| O | 0.34278582 | 0.50771104 | 0.21834288 |
| O | 0.32602391 | 0.51298413 | 0.99514209 |
| O | 0.28512500 | 0.53224448 | 0.35955972 |
| O | 0.49857102 | 0.77707840 | 0.14937631 |
| O | 0.57326942 | 0.75968242 | 0.04080476 |
| O | 0.84499334 | 0.77245698 | 0.58658543 |
| O | 0.82759926 | 0.75151390 | 0.78579391 |
| O | 0.84738064 | 0.74773375 | 0.21863528 |
| O | 0.81931021 | 0.75017210 | 0.99420182 |
| O | 0.79407786 | 0.78132927 | 0.36708596 |
| O | 0.00130270 | 0.51828858 | 0.85964449 |
| O | 0.91781106 | 0.48335084 | 0.94249410 |
| O | 0.65573785 | 0.52948481 | 0.41346881 |

|    |            |            |            |
|----|------------|------------|------------|
| O  | 0.67622724 | 0.50396336 | 0.21913821 |
| O  | 0.65356563 | 0.50461283 | 0.78243659 |
| O  | 0.67605803 | 0.53212712 | 0.00490100 |
| O  | 0.70825501 | 0.52471638 | 0.63456532 |
| O  | 0.49469610 | 0.77121031 | 0.83462165 |
| O  | 0.42530543 | 0.71141325 | 0.94962906 |
| O  | 0.15146652 | 0.76148081 | 0.42462566 |
| O  | 0.17559132 | 0.75944546 | 0.23242245 |
| O  | 0.15721025 | 0.77013896 | 0.79245175 |
| O  | 0.17007861 | 0.76508384 | 0.01383202 |
| O  | 0.21164140 | 0.76839838 | 0.64489114 |
| O  | 0.25705754 | 0.84369996 | 0.48855613 |
| O  | 0.73909665 | 0.85340780 | 0.50808360 |
| O  | 0.76269528 | 0.60411186 | 0.49362729 |
| O  | 0.23422003 | 0.59291330 | 0.50925099 |
| Si | 0.06312746 | 0.98153612 | 0.17014696 |
| Si | 0.06348333 | 0.98764235 | 0.91304291 |
| Si | 0.36938788 | 0.95751929 | 0.71736220 |
| Si | 0.37065388 | 0.98753142 | 0.11276466 |
| Si | 0.28753592 | 0.99434304 | 0.86263249 |
| Si | 0.28408023 | 0.03044275 | 0.22922518 |
| Si | 0.28242142 | 0.98954214 | 0.48561862 |
| Si | 0.56504960 | 0.24776535 | 0.17131879 |
| Si | 0.56970064 | 0.27553086 | 0.91735000 |
| Si | 0.87103222 | 0.24326014 | 0.71233279 |
| Si | 0.87145614 | 0.23366102 | 0.11199304 |
| Si | 0.78654281 | 0.28237637 | 0.85660574 |
| Si | 0.78336141 | 0.28925216 | 0.22131486 |
| Si | 0.78129317 | 0.25389415 | 0.47930603 |
| Si | 0.93373277 | 0.99209950 | 0.82744299 |
| Si | 0.93263804 | 0.98317998 | 0.08278570 |
| Si | 0.62963272 | 0.99377752 | 0.27805933 |
| Si | 0.63254756 | 0.02655808 | 0.89208792 |
| Si | 0.71758236 | 0.03083611 | 0.14263319 |
| Si | 0.71688717 | 0.03133701 | 0.77047907 |

|    |            |            |            |
|----|------------|------------|------------|
| Si | 0.71575533 | 0.00091927 | 0.51179494 |
| Si | 0.43355512 | 0.23419279 | 0.09182143 |
| Si | 0.12826433 | 0.23239948 | 0.28080421 |
| Si | 0.12950084 | 0.23863695 | 0.88870862 |
| Si | 0.21502185 | 0.27838841 | 0.14177424 |
| Si | 0.21566092 | 0.24431790 | 0.77094016 |
| Si | 0.21736423 | 0.24293077 | 0.51510550 |
| Si | 0.43396896 | 0.70975630 | 0.82545882 |
| Si | 0.06607329 | 0.48421441 | 0.17189619 |
| Si | 0.06703897 | 0.48770487 | 0.91786646 |
| Si | 0.37055930 | 0.47269880 | 0.71158944 |
| Si | 0.37212008 | 0.48692008 | 0.12078251 |
| Si | 0.28874064 | 0.48845049 | 0.86303874 |
| Si | 0.28147338 | 0.53685162 | 0.22664767 |
| Si | 0.28043851 | 0.49859013 | 0.48404121 |
| Si | 0.56332401 | 0.74608820 | 0.16458745 |
| Si | 0.56138604 | 0.78349247 | 0.90440144 |
| Si | 0.87402094 | 0.74094929 | 0.72202988 |
| Si | 0.87106483 | 0.72945976 | 0.11211762 |
| Si | 0.78652928 | 0.77752174 | 0.85973181 |
| Si | 0.78789423 | 0.78667328 | 0.23291468 |
| Si | 0.78480644 | 0.75328224 | 0.48835122 |
| Si | 0.93569081 | 0.48433267 | 0.82697314 |
| Si | 0.93487663 | 0.47901416 | 0.08180265 |
| Si | 0.62777505 | 0.49557634 | 0.27841601 |
| Si | 0.62648056 | 0.53453387 | 0.88234459 |
| Si | 0.71351490 | 0.53968031 | 0.13816720 |
| Si | 0.71420183 | 0.53347110 | 0.76852623 |
| Si | 0.71597461 | 0.50371845 | 0.51140737 |
| Si | 0.43477548 | 0.73065224 | 0.08548816 |
| Si | 0.12603225 | 0.73631988 | 0.28730344 |
| Si | 0.12610014 | 0.74397485 | 0.88685968 |
| Si | 0.21004257 | 0.78475172 | 0.14389846 |
| Si | 0.21784646 | 0.74393903 | 0.77848519 |
| Si | 0.21363779 | 0.74184351 | 0.51753914 |

Ga 0.43582636 0.23156590 0.83048941

### HGa(2)-MTW

a = 25.4744 Å

b = 10.2209 Å

c = 12.2699 Å

$\alpha$  = 88.617°

$\beta$  = 109.364°

$\gamma$  = 90.8193°

|   |            |            |            |
|---|------------|------------|------------|
| H | 0.36338841 | 0.39168747 | 0.56243268 |
| O | 0.10857347 | 0.41158313 | 0.25110460 |
| O | 0.07199398 | 0.16020514 | 0.87971825 |
| O | 0.25164107 | 0.32865364 | 0.84768382 |
| O | 0.57913519 | 0.05886930 | 0.22096326 |
| O | 0.59448307 | 0.32651909 | 0.86114351 |
| O | 0.76257386 | 0.07687617 | 0.84744208 |
| O | 0.89847094 | 0.40781413 | 0.73658160 |
| O | 0.92289580 | 0.15444436 | 0.12746146 |
| O | 0.76296395 | 0.40236122 | 0.15798731 |
| O | 0.39037221 | 0.19613033 | 0.73674374 |
| O | 0.42526282 | 0.41155342 | 0.13838604 |
| O | 0.26906530 | 0.16043852 | 0.18063435 |
| O | 0.91720344 | 0.15586813 | 0.78100393 |
| O | 0.90131324 | 0.40465626 | 0.13044909 |
| O | 0.73914437 | 0.15043829 | 0.16148530 |
| O | 0.43263506 | 0.43384653 | 0.79435260 |
| O | 0.40654267 | 0.15765017 | 0.14343122 |
| O | 0.23647557 | 0.40671817 | 0.13469398 |
| O | 0.07894654 | 0.16202161 | 0.21602446 |
| O | 0.10620624 | 0.40614546 | 0.89217528 |
| O | 0.23189141 | 0.07416178 | 0.83010286 |
| O | 0.61162999 | 0.30627165 | 0.26511905 |
| O | 0.58052876 | 0.07120995 | 0.87276378 |
| O | 0.73212158 | 0.32586833 | 0.82638766 |

|   |            |            |            |
|---|------------|------------|------------|
| O | 0.00144130 | 0.97829977 | 0.15472480 |
| O | 0.07961370 | 0.99157760 | 0.05494387 |
| O | 0.34846088 | 0.01048875 | 0.58473253 |
| O | 0.31908738 | 0.01846048 | 0.77096436 |
| O | 0.34851567 | 0.98337167 | 0.21818133 |
| O | 0.32843619 | 0.01481121 | 0.99324109 |
| O | 0.29180125 | 0.99442208 | 0.36261778 |
| O | 0.50613967 | 0.24953666 | 0.15016945 |
| O | 0.58452045 | 0.21988070 | 0.05190652 |
| O | 0.84373786 | 0.23514174 | 0.57998983 |
| O | 0.81898029 | 0.25697033 | 0.76976551 |
| O | 0.84523019 | 0.23154466 | 0.21367653 |
| O | 0.82578194 | 0.24863683 | 0.98929340 |
| O | 0.79113284 | 0.26903548 | 0.35850894 |
| O | 0.99534527 | 0.97573337 | 0.85609070 |
| O | 0.91739982 | 0.99551047 | 0.95491323 |
| O | 0.65682173 | 0.97798889 | 0.41495251 |
| O | 0.67634577 | 0.96838188 | 0.21689663 |
| O | 0.65589719 | 0.99598104 | 0.77849633 |
| O | 0.68080069 | 0.98721011 | 0.00407972 |
| O | 0.71398221 | 0.99165330 | 0.63509510 |
| O | 0.49704639 | 0.22440118 | 0.85912705 |
| O | 0.41947294 | 0.26481107 | 0.95574394 |
| O | 0.15332006 | 0.23435438 | 0.41575145 |
| O | 0.18096024 | 0.23867721 | 0.22714844 |
| O | 0.14722647 | 0.23725107 | 0.78075133 |
| O | 0.17556787 | 0.21828393 | 0.00815102 |
| O | 0.20600398 | 0.22496261 | 0.63939525 |
| O | 0.23598770 | 0.40207145 | 0.50707323 |
| O | 0.76280623 | 0.40950698 | 0.50904224 |
| O | 0.73698917 | 0.15723120 | 0.48780543 |
| O | 0.25951692 | 0.15633523 | 0.49475292 |
| O | 0.10616257 | 0.91375515 | 0.27353965 |
| O | 0.08049780 | 0.65637057 | 0.85467861 |
| O | 0.26902514 | 0.83115368 | 0.85755116 |



|   |            |            |            |
|---|------------|------------|------------|
| O | 0.58162421 | 0.55418440 | 0.21926922 |
| O | 0.60522201 | 0.82178830 | 0.87478602 |
| O | 0.75992978 | 0.57478097 | 0.86283721 |
| O | 0.89091073 | 0.90591453 | 0.74261890 |
| O | 0.92347935 | 0.65626170 | 0.12049487 |
| O | 0.76811382 | 0.90102141 | 0.17686971 |
| O | 0.38994448 | 0.70886190 | 0.72428733 |
| O | 0.42410520 | 0.90698515 | 0.12532636 |
| O | 0.26120018 | 0.65710005 | 0.17521656 |
| O | 0.92387590 | 0.65905870 | 0.77146732 |
| O | 0.90002534 | 0.90238597 | 0.14302889 |
| O | 0.73591402 | 0.65405207 | 0.14130828 |
| O | 0.42293504 | 0.95036659 | 0.79207310 |
| O | 0.39352319 | 0.65921324 | 0.11755393 |
| O | 0.24124355 | 0.91154553 | 0.14950487 |
| O | 0.08171044 | 0.66161271 | 0.23945535 |
| O | 0.09773412 | 0.91245757 | 0.86784951 |
| O | 0.23491541 | 0.58390052 | 0.84592680 |
| O | 0.60287943 | 0.80620938 | 0.25941289 |
| O | 0.57107291 | 0.57685400 | 0.86515470 |
| O | 0.73713283 | 0.82582191 | 0.81453200 |
| O | 0.00371855 | 0.48370946 | 0.14973044 |
| O | 0.08023048 | 0.53979380 | 0.05000141 |
| O | 0.34514953 | 0.47447135 | 0.56915051 |
| O | 0.31075751 | 0.49451652 | 0.76247189 |
| O | 0.34324247 | 0.48704266 | 0.21410069 |
| O | 0.32677338 | 0.47642989 | 0.99003717 |
| O | 0.28187827 | 0.48110429 | 0.35016933 |
| O | 0.49945203 | 0.72266231 | 0.15531203 |
| O | 0.57385597 | 0.72219915 | 0.04489127 |
| O | 0.84442948 | 0.73570960 | 0.57743855 |
| O | 0.82252685 | 0.71857312 | 0.77202645 |
| O | 0.84436837 | 0.71623570 | 0.21124086 |
| O | 0.82674646 | 0.75587144 | 0.98801711 |
| O | 0.78791308 | 0.73182101 | 0.35572379 |

|    |            |            |            |
|----|------------|------------|------------|
| O  | 0.00216282 | 0.48049080 | 0.85125147 |
| O  | 0.92250495 | 0.50185806 | 0.94699824 |
| O  | 0.65595802 | 0.48342011 | 0.42428911 |
| O  | 0.68484775 | 0.48237764 | 0.23819055 |
| O  | 0.65263651 | 0.50275909 | 0.78887634 |
| O  | 0.66524055 | 0.48271359 | 0.01213764 |
| O  | 0.71019417 | 0.49558596 | 0.64726817 |
| O  | 0.49818228 | 0.76612643 | 0.83739069 |
| O  | 0.42394827 | 0.76175816 | 0.94732768 |
| O  | 0.16197230 | 0.73661454 | 0.43007917 |
| O  | 0.17834223 | 0.75277291 | 0.22982306 |
| O  | 0.15991606 | 0.77033525 | 0.78583301 |
| O  | 0.17202688 | 0.74758413 | 0.00897727 |
| O  | 0.21942873 | 0.72653251 | 0.65193992 |
| O  | 0.24649926 | 0.90106176 | 0.51480543 |
| O  | 0.76395216 | 0.90851124 | 0.48911708 |
| O  | 0.73693333 | 0.65992551 | 0.50445488 |
| O  | 0.26721863 | 0.65070634 | 0.50191130 |
| Si | 0.43545190 | 0.28280973 | 0.83744480 |
| Si | 0.06623964 | 0.01127254 | 0.17460970 |
| Si | 0.06089998 | 0.01011339 | 0.91458845 |
| Si | 0.37067925 | 0.04283719 | 0.72238516 |
| Si | 0.37691495 | 0.01487934 | 0.11900956 |
| Si | 0.28759257 | 0.98463437 | 0.86386363 |
| Si | 0.28771909 | 0.01213775 | 0.22854581 |
| Si | 0.28637508 | 0.01416432 | 0.48867223 |
| Si | 0.56990744 | 0.20905685 | 0.17156437 |
| Si | 0.56384942 | 0.21116302 | 0.91118645 |
| Si | 0.86987718 | 0.26341655 | 0.71755916 |
| Si | 0.87370335 | 0.25938446 | 0.11465511 |
| Si | 0.78501329 | 0.22718702 | 0.85863965 |
| Si | 0.78442162 | 0.26249370 | 0.22348058 |
| Si | 0.78322319 | 0.26701187 | 0.48349308 |
| Si | 0.93038673 | 0.00811626 | 0.83366772 |
| Si | 0.93555755 | 0.00798161 | 0.09487972 |

|    |            |            |            |
|----|------------|------------|------------|
| Si | 0.62863784 | 0.95333119 | 0.27739738 |
| Si | 0.63036688 | 0.96936777 | 0.88274754 |
| Si | 0.71579842 | 0.00174545 | 0.13967748 |
| Si | 0.71734994 | 0.97333029 | 0.76823710 |
| Si | 0.71819980 | 0.00830791 | 0.50711981 |
| Si | 0.43959954 | 0.27052135 | 0.09624739 |
| Si | 0.12999911 | 0.26183849 | 0.27662555 |
| Si | 0.12501939 | 0.25605001 | 0.88958265 |
| Si | 0.21519018 | 0.25592525 | 0.13679263 |
| Si | 0.20957313 | 0.21741165 | 0.77397975 |
| Si | 0.21360931 | 0.25247157 | 0.51584401 |
| Si | 0.43372050 | 0.79451755 | 0.82404768 |
| Si | 0.06814694 | 0.52372219 | 0.17180332 |
| Si | 0.06709569 | 0.52040957 | 0.91192134 |
| Si | 0.37225473 | 0.50850555 | 0.11410841 |
| Si | 0.28208893 | 0.47126151 | 0.86022189 |
| Si | 0.28071437 | 0.50883773 | 0.21775854 |
| Si | 0.27930416 | 0.50193583 | 0.47789713 |
| Si | 0.56420418 | 0.70172225 | 0.16881890 |
| Si | 0.56153104 | 0.72239347 | 0.90561488 |
| Si | 0.87068498 | 0.75490956 | 0.71634153 |
| Si | 0.87358821 | 0.75636189 | 0.11542964 |
| Si | 0.78683885 | 0.71953956 | 0.85972777 |
| Si | 0.78398648 | 0.75078220 | 0.22207452 |
| Si | 0.78304103 | 0.75852803 | 0.48129230 |
| Si | 0.93695809 | 0.51188194 | 0.82702935 |
| Si | 0.93782554 | 0.51150470 | 0.08661234 |
| Si | 0.63301244 | 0.45730792 | 0.28605798 |
| Si | 0.62094282 | 0.47271439 | 0.88218165 |
| Si | 0.71198619 | 0.50506281 | 0.13639860 |
| Si | 0.71382970 | 0.47494425 | 0.78037764 |
| Si | 0.71661671 | 0.51141402 | 0.52113123 |
| Si | 0.43555071 | 0.76252886 | 0.08574351 |
| Si | 0.13173055 | 0.76659186 | 0.29262266 |
| Si | 0.12765140 | 0.77150036 | 0.87984469 |

|    |            |            |            |
|----|------------|------------|------------|
| Si | 0.21265769 | 0.76747218 | 0.13993897 |
| Si | 0.22118085 | 0.72807658 | 0.78514308 |
| Si | 0.22368741 | 0.75424841 | 0.52576566 |
| Ga | 0.37335252 | 0.53892356 | 0.73390780 |

### HGa(3)-MTW

a = 25.4076 Å

b = 10.2436 Å

c = 12.4183 Å

$\alpha$  = 90.2236°

$\beta$  = 109.227°

$\gamma$  = 90.0363°

|   |            |            |            |
|---|------------|------------|------------|
| H | 0.37553136 | 0.45001843 | 0.54005321 |
| O | 0.10387191 | 0.39412630 | 0.26302350 |
| O | 0.07467627 | 0.13924360 | 0.87577093 |
| O | 0.23207939 | 0.38884025 | 0.81498353 |
| O | 0.60301622 | 0.14854822 | 0.26544984 |
| O | 0.57676409 | 0.38729293 | 0.87707064 |
| O | 0.73542077 | 0.14602255 | 0.82277251 |
| O | 0.89654512 | 0.39381615 | 0.73968736 |
| O | 0.92298746 | 0.14502554 | 0.12765696 |
| O | 0.76665814 | 0.40255178 | 0.17806229 |
| O | 0.39653147 | 0.13635341 | 0.73733714 |
| O | 0.41954803 | 0.40063485 | 0.10722782 |
| O | 0.26568901 | 0.15620549 | 0.17103415 |
| O | 0.92181156 | 0.14236161 | 0.77203154 |
| O | 0.89816070 | 0.39517054 | 0.12522730 |
| O | 0.73897659 | 0.15248695 | 0.15656072 |
| O | 0.42568688 | 0.38292262 | 0.77749697 |
| O | 0.39955826 | 0.14977680 | 0.13178041 |
| O | 0.23558836 | 0.40651608 | 0.14631945 |
| O | 0.07976725 | 0.14527733 | 0.21807948 |
| O | 0.10047690 | 0.38837118 | 0.86977686 |
| O | 0.26185477 | 0.14233684 | 0.85016779 |

|   |            |            |            |
|---|------------|------------|------------|
| O | 0.58116744 | 0.39996509 | 0.22330449 |
| O | 0.60631281 | 0.13983219 | 0.87960338 |
| O | 0.76243562 | 0.39754088 | 0.84646340 |
| O | 0.00058146 | 0.96710964 | 0.14349759 |
| O | 0.08130147 | 0.98190175 | 0.05112373 |
| O | 0.33831506 | 0.97580360 | 0.57512937 |
| O | 0.32149380 | 0.97296216 | 0.77409536 |
| O | 0.34524151 | 0.97863987 | 0.21451952 |
| O | 0.33011957 | 0.97884038 | 0.99262268 |
| O | 0.28962667 | 0.00705395 | 0.35706520 |
| O | 0.50088913 | 0.22707229 | 0.14650967 |
| O | 0.58243996 | 0.23669986 | 0.05592452 |
| O | 0.84336027 | 0.22165613 | 0.58190497 |
| O | 0.82409589 | 0.22664126 | 0.77800102 |
| O | 0.84604801 | 0.22592802 | 0.21587337 |
| O | 0.82403363 | 0.22661776 | 0.99248405 |
| O | 0.79119763 | 0.24986870 | 0.36250603 |
| O | 0.99766560 | 0.95865838 | 0.85496024 |
| O | 0.91772100 | 0.99754509 | 0.94724785 |
| O | 0.65625321 | 0.97155092 | 0.41740647 |
| O | 0.67515736 | 0.98469949 | 0.22073062 |
| O | 0.65667836 | 0.96753943 | 0.78696859 |
| O | 0.68118861 | 0.97384733 | 0.01113414 |
| O | 0.70994756 | 0.99148010 | 0.63753549 |
| O | 0.50162082 | 0.20078615 | 0.85713290 |
| O | 0.41968132 | 0.22873559 | 0.94631653 |
| O | 0.15411387 | 0.21524986 | 0.41811745 |
| O | 0.18039957 | 0.23428407 | 0.23091510 |
| O | 0.15397605 | 0.20982163 | 0.79063001 |
| O | 0.17215302 | 0.22607436 | 0.01238877 |
| O | 0.20572795 | 0.21762686 | 0.63935504 |
| O | 0.22623999 | 0.40735208 | 0.51170768 |
| O | 0.76282654 | 0.39795732 | 0.51136341 |
| O | 0.73661887 | 0.14744880 | 0.49173940 |
| O | 0.26413163 | 0.16668362 | 0.50221849 |

|   |            |            |            |
|---|------------|------------|------------|
| O | 0.10371142 | 0.89515221 | 0.26118264 |
| O | 0.07884778 | 0.63966701 | 0.87779718 |
| O | 0.23846942 | 0.88790120 | 0.83992304 |
| O | 0.60533803 | 0.64984123 | 0.26550231 |
| O | 0.58119168 | 0.89055471 | 0.88081856 |
| O | 0.73364743 | 0.64650055 | 0.82717148 |
| O | 0.89271452 | 0.89359495 | 0.74176300 |
| O | 0.92324957 | 0.64500404 | 0.12608062 |
| O | 0.76716383 | 0.90211898 | 0.18835949 |
| O | 0.39764967 | 0.63242341 | 0.75787899 |
| O | 0.42601601 | 0.89835755 | 0.13790594 |
| O | 0.26664727 | 0.65413319 | 0.17539710 |
| O | 0.92179316 | 0.64427406 | 0.77284040 |
| O | 0.89761022 | 0.89492125 | 0.12522466 |
| O | 0.73839839 | 0.65336315 | 0.14858114 |
| O | 0.41738107 | 0.88462814 | 0.75788714 |
| O | 0.39516056 | 0.64936842 | 0.11490412 |
| O | 0.23821052 | 0.90533226 | 0.15205636 |
| O | 0.08000257 | 0.64428034 | 0.22319745 |
| O | 0.10070826 | 0.88986852 | 0.86892007 |
| O | 0.25910154 | 0.63971566 | 0.81092092 |
| O | 0.57750477 | 0.89827685 | 0.22443907 |
| O | 0.60151386 | 0.63787691 | 0.87687003 |
| O | 0.76374655 | 0.89666855 | 0.84310242 |
| O | 0.00108379 | 0.46729631 | 0.14116652 |
| O | 0.08377611 | 0.48543590 | 0.05432232 |
| O | 0.35062932 | 0.46857935 | 0.58474028 |
| O | 0.32163685 | 0.45428744 | 0.76490784 |
| O | 0.34306269 | 0.47295949 | 0.19913776 |
| O | 0.32078960 | 0.48771335 | 0.97552041 |
| O | 0.29524016 | 0.48933795 | 0.35645178 |
| O | 0.50076401 | 0.71426090 | 0.14891812 |
| O | 0.58087679 | 0.73964826 | 0.05541944 |
| O | 0.84335868 | 0.72126087 | 0.58133763 |
| O | 0.82200500 | 0.71708537 | 0.77534077 |

|    |            |            |            |
|----|------------|------------|------------|
| O  | 0.84582015 | 0.72425748 | 0.21472634 |
| O  | 0.82430810 | 0.72651271 | 0.99146090 |
| O  | 0.79016689 | 0.73232923 | 0.36104234 |
| O  | 0.99951207 | 0.46609420 | 0.85906880 |
| O  | 0.91728363 | 0.49544022 | 0.94580546 |
| O  | 0.65592114 | 0.47304771 | 0.42127374 |
| O  | 0.68110610 | 0.48765643 | 0.23263440 |
| O  | 0.65511546 | 0.46629751 | 0.79173738 |
| O  | 0.67432213 | 0.47333870 | 0.01474684 |
| O  | 0.70713431 | 0.49314335 | 0.64160491 |
| O  | 0.49991935 | 0.72025956 | 0.85432827 |
| O  | 0.42224947 | 0.76656531 | 0.95090169 |
| O  | 0.15776560 | 0.72265385 | 0.41646935 |
| O  | 0.17814868 | 0.73251955 | 0.22272661 |
| O  | 0.15519981 | 0.71745017 | 0.78631763 |
| O  | 0.17690118 | 0.73119032 | 0.00829692 |
| O  | 0.20129049 | 0.78217281 | 0.63269016 |
| O  | 0.22889163 | 0.92165489 | 0.48082067 |
| O  | 0.76316640 | 0.89741901 | 0.50129089 |
| O  | 0.73628730 | 0.64845673 | 0.49879927 |
| O  | 0.26768092 | 0.68046763 | 0.52397953 |
| Si | 0.43632287 | 0.23526793 | 0.83078723 |
| Si | 0.06621882 | 0.99762595 | 0.16843811 |
| Si | 0.06351803 | 0.99240905 | 0.91269936 |
| Si | 0.36791874 | 0.99199690 | 0.71146193 |
| Si | 0.37496641 | 0.00174553 | 0.11877383 |
| Si | 0.28787818 | 0.99609947 | 0.86386503 |
| Si | 0.28417523 | 0.01151668 | 0.22419260 |
| Si | 0.27956729 | 0.01737202 | 0.47847761 |
| Si | 0.56675583 | 0.25301253 | 0.17254619 |
| Si | 0.56675496 | 0.24113714 | 0.91767298 |
| Si | 0.87176836 | 0.24639647 | 0.71843206 |
| Si | 0.87284547 | 0.24846511 | 0.11482452 |
| Si | 0.78692257 | 0.24976324 | 0.86045738 |
| Si | 0.78568007 | 0.25723509 | 0.22925604 |

|    |            |            |            |
|----|------------|------------|------------|
| Si | 0.78329414 | 0.25389868 | 0.48632082 |
| Si | 0.93293796 | 0.99807192 | 0.82957454 |
| Si | 0.93504445 | 0.00085418 | 0.08592922 |
| Si | 0.62798480 | 0.00104464 | 0.28184082 |
| Si | 0.63148547 | 0.99280223 | 0.89004269 |
| Si | 0.71543712 | 0.00383118 | 0.14410709 |
| Si | 0.71670345 | 0.00016304 | 0.77157797 |
| Si | 0.71689753 | 0.00145145 | 0.51297458 |
| Si | 0.43495313 | 0.25193457 | 0.08353896 |
| Si | 0.12943534 | 0.24712083 | 0.28267653 |
| Si | 0.12545209 | 0.24113519 | 0.88739100 |
| Si | 0.21322034 | 0.25709545 | 0.14015318 |
| Si | 0.21337287 | 0.23950392 | 0.77234536 |
| Si | 0.21288138 | 0.25416428 | 0.51760900 |
| Si | 0.43472963 | 0.75192961 | 0.83145786 |
| Si | 0.06706019 | 0.49774089 | 0.17026899 |
| Si | 0.06570943 | 0.49506555 | 0.91562586 |
| Si | 0.37526436 | 0.48578533 | 0.72779306 |
| Si | 0.36917528 | 0.50271260 | 0.09895609 |
| Si | 0.28261755 | 0.49360009 | 0.84250911 |
| Si | 0.28452715 | 0.50593893 | 0.22217460 |
| Si | 0.56590559 | 0.75058006 | 0.17325706 |
| Si | 0.56593646 | 0.74716590 | 0.91744848 |
| Si | 0.87029650 | 0.74432364 | 0.71837227 |
| Si | 0.87285176 | 0.74763852 | 0.11410807 |
| Si | 0.78628394 | 0.74724567 | 0.85979753 |
| Si | 0.78542189 | 0.75302949 | 0.22900934 |
| Si | 0.78307053 | 0.74967951 | 0.48505235 |
| Si | 0.93415728 | 0.49987222 | 0.82994877 |
| Si | 0.93538391 | 0.50053094 | 0.08471648 |
| Si | 0.63071206 | 0.50280755 | 0.28524934 |
| Si | 0.62711151 | 0.49143479 | 0.89044576 |
| Si | 0.71491411 | 0.50485387 | 0.14299240 |
| Si | 0.71485769 | 0.50050331 | 0.77602381 |
| Si | 0.71602065 | 0.50259253 | 0.51894471 |



|    |            |            |            |
|----|------------|------------|------------|
| Si | 0.43608213 | 0.75662227 | 0.08855472 |
| Si | 0.12969295 | 0.74882789 | 0.28070160 |
| Si | 0.12798615 | 0.74475601 | 0.88586900 |
| Si | 0.21484964 | 0.75632002 | 0.13952654 |
| Si | 0.21348615 | 0.75606626 | 0.76643939 |
| Si | 0.21494294 | 0.77411920 | 0.51409979 |
| Ga | 0.27324203 | 0.51651809 | 0.47790303 |

### HGa(4)-MTW

a = 25.5825 Å

b = 10.2275 Å

c = 12.3088 Å

$\alpha$  = 90.0931°

$\beta$  = 109.022°

$\gamma$  = 89.428°

|   |            |            |            |
|---|------------|------------|------------|
| H | 0.26645856 | 0.57555898 | 0.06689756 |
| O | 0.07942343 | 0.33155250 | 0.21346099 |
| O | 0.10650626 | 0.10838309 | 0.88720888 |
| O | 0.26151638 | 0.35854499 | 0.84842062 |
| O | 0.57258328 | 0.10975325 | 0.21859555 |
| O | 0.60199427 | 0.34163499 | 0.86953581 |
| O | 0.74140482 | 0.16675834 | 0.79351180 |
| O | 0.92245971 | 0.36874334 | 0.76031254 |
| O | 0.92384039 | 0.15764476 | 0.12100386 |
| O | 0.76520435 | 0.41125455 | 0.18516967 |
| O | 0.41982102 | 0.09426538 | 0.74980787 |
| O | 0.39153687 | 0.36473270 | 0.05707710 |
| O | 0.23116359 | 0.06719470 | 0.12967815 |
| O | 0.89574795 | 0.11956309 | 0.75524910 |
| O | 0.89292740 | 0.40680237 | 0.10383030 |
| O | 0.74174555 | 0.16073909 | 0.14304711 |
| O | 0.39709463 | 0.34395839 | 0.77772713 |
| O | 0.41539129 | 0.12483517 | 0.14778855 |
| O | 0.26975535 | 0.30139670 | 0.20252798 |

|   |            |            |            |
|---|------------|------------|------------|
| O | 0.09760504 | 0.08384475 | 0.27597929 |
| O | 0.07988747 | 0.35923742 | 0.87794729 |
| O | 0.23945531 | 0.10697963 | 0.81556452 |
| O | 0.60116858 | 0.35743360 | 0.26467700 |
| O | 0.58645883 | 0.09191117 | 0.90607654 |
| O | 0.75510699 | 0.41241176 | 0.86511786 |
| O | 0.00091540 | 0.97102660 | 0.16704582 |
| O | 0.07226140 | 0.02429763 | 0.05598334 |
| O | 0.33894629 | 0.01416059 | 0.56960020 |
| O | 0.32688735 | 0.00522960 | 0.77524403 |
| O | 0.33911160 | 0.00461547 | 0.21269526 |
| O | 0.32610747 | 0.03084198 | 0.98979734 |
| O | 0.27915658 | 0.01540388 | 0.35143270 |
| O | 0.49613183 | 0.29357990 | 0.15564236 |
| O | 0.57265677 | 0.27411350 | 0.05002175 |
| O | 0.84397067 | 0.27205261 | 0.57814035 |
| O | 0.82537602 | 0.30407011 | 0.77577833 |
| O | 0.84636790 | 0.24040743 | 0.20828260 |
| O | 0.82390612 | 0.22611265 | 0.98200438 |
| O | 0.79192672 | 0.23700668 | 0.35788259 |
| O | 0.00129392 | 0.04579281 | 0.84397868 |
| O | 0.93005688 | 0.99535694 | 0.95509137 |
| O | 0.65264843 | 0.04167196 | 0.41098729 |
| O | 0.67008182 | 0.02933070 | 0.21168365 |
| O | 0.65445749 | 0.02510599 | 0.78870544 |
| O | 0.68353183 | 0.97423440 | 0.01151991 |
| O | 0.70242033 | 0.99015019 | 0.63013867 |
| O | 0.50113049 | 0.25804190 | 0.83794944 |
| O | 0.43609976 | 0.18557148 | 0.95788066 |
| O | 0.15339206 | 0.26953748 | 0.41647503 |
| O | 0.17477556 | 0.22062583 | 0.22462458 |
| O | 0.15721534 | 0.27602677 | 0.79263740 |
| O | 0.17872506 | 0.27888534 | 0.01782360 |
| O | 0.20763589 | 0.27327199 | 0.63825413 |
| O | 0.25951189 | 0.34482908 | 0.49389821 |

|   |            |            |            |
|---|------------|------------|------------|
| O | 0.74087882 | 0.36520955 | 0.48246226 |
| O | 0.75873067 | 0.11130887 | 0.51304676 |
| O | 0.23362159 | 0.09562300 | 0.50559848 |
| O | 0.09395408 | 0.83519821 | 0.21165236 |
| O | 0.10336650 | 0.61030814 | 0.87757341 |
| O | 0.26199672 | 0.85474738 | 0.85211175 |
| O | 0.58180025 | 0.60903535 | 0.22658602 |
| O | 0.60221880 | 0.84279704 | 0.86423888 |
| O | 0.74287714 | 0.66218467 | 0.80201788 |
| O | 0.92319831 | 0.87052521 | 0.76131779 |
| O | 0.91599262 | 0.65881473 | 0.11797871 |
| O | 0.76242079 | 0.91224654 | 0.20670608 |
| O | 0.42436926 | 0.59390282 | 0.78035579 |
| O | 0.40104546 | 0.86617795 | 0.12235177 |
| O | 0.24758152 | 0.57870301 | 0.12867224 |
| O | 0.89908789 | 0.62044765 | 0.72710210 |
| O | 0.89460295 | 0.91106865 | 0.12128754 |
| O | 0.74028363 | 0.66370264 | 0.15036516 |
| O | 0.39733534 | 0.84142785 | 0.72220699 |
| O | 0.41729917 | 0.61150350 | 0.10511369 |
| O | 0.26316014 | 0.82466082 | 0.19844554 |
| O | 0.09237010 | 0.58432761 | 0.26548752 |
| O | 0.07890388 | 0.86060398 | 0.89161507 |
| O | 0.23118898 | 0.60863925 | 0.81587401 |
| O | 0.60095556 | 0.86134211 | 0.25873009 |
| O | 0.57879512 | 0.59271247 | 0.88563913 |
| O | 0.75465942 | 0.91541245 | 0.84528412 |
| O | 0.99524332 | 0.48841599 | 0.13770181 |
| O | 0.07843106 | 0.51018724 | 0.05317722 |
| O | 0.34457164 | 0.49558311 | 0.60108870 |
| O | 0.32888386 | 0.53146408 | 0.80187595 |
| O | 0.36162115 | 0.48884665 | 0.22395553 |
| O | 0.31101444 | 0.53959775 | 0.00314342 |
| O | 0.29166574 | 0.53221851 | 0.37851147 |
| O | 0.50024188 | 0.77697050 | 0.14000047 |

|    |            |            |            |
|----|------------|------------|------------|
| O  | 0.58180895 | 0.76280127 | 0.05084928 |
| O  | 0.83663571 | 0.79655336 | 0.58429563 |
| O  | 0.83367985 | 0.78193028 | 0.79733963 |
| O  | 0.84505935 | 0.74669448 | 0.22083236 |
| O  | 0.81624600 | 0.74779463 | 0.99554234 |
| O  | 0.79086463 | 0.72546714 | 0.36816190 |
| O  | 0.00075086 | 0.53993739 | 0.84889380 |
| O  | 0.91767479 | 0.52147928 | 0.93438751 |
| O  | 0.65558526 | 0.52778303 | 0.42460260 |
| O  | 0.67947128 | 0.50913783 | 0.23348990 |
| O  | 0.65484820 | 0.52204658 | 0.79244814 |
| O  | 0.67553990 | 0.49069806 | 0.01612514 |
| O  | 0.70737998 | 0.47578924 | 0.64444358 |
| O  | 0.50064619 | 0.77521575 | 0.84814518 |
| O  | 0.41915668 | 0.77184797 | 0.93782587 |
| O  | 0.15657924 | 0.74600845 | 0.41697330 |
| O  | 0.18091390 | 0.68331165 | 0.22911626 |
| O  | 0.15477005 | 0.79077238 | 0.79558621 |
| O  | 0.17693035 | 0.76625654 | 0.01939318 |
| O  | 0.20465376 | 0.77877282 | 0.63934677 |
| O  | 0.25763918 | 0.84457590 | 0.49420351 |
| O  | 0.73179607 | 0.86313986 | 0.46993970 |
| O  | 0.75851759 | 0.61676183 | 0.53128287 |
| O  | 0.24255525 | 0.59425297 | 0.53285385 |
| Si | 0.43843694 | 0.22210586 | 0.83057877 |
| Si | 0.06592397 | 0.97864883 | 0.17790240 |
| Si | 0.06478033 | 0.00991364 | 0.91988753 |
| Si | 0.37067023 | 0.98828680 | 0.70532002 |
| Si | 0.37055920 | 0.00678973 | 0.11750431 |
| Si | 0.28913559 | 0.99951492 | 0.85843034 |
| Si | 0.27843709 | 0.97884736 | 0.22305879 |
| Si | 0.27701750 | 0.99267336 | 0.47971190 |
| Si | 0.56058074 | 0.25942309 | 0.17167862 |
| Si | 0.56561010 | 0.24069328 | 0.91630399 |
| Si | 0.87195164 | 0.26558327 | 0.71715905 |

|    |            |            |            |
|----|------------|------------|------------|
| Si | 0.87184243 | 0.25777760 | 0.10398811 |
| Si | 0.78668136 | 0.27610467 | 0.85486621 |
| Si | 0.78615978 | 0.26267512 | 0.22459995 |
| Si | 0.78359676 | 0.24689355 | 0.48247684 |
| Si | 0.93773521 | 0.00865468 | 0.82958844 |
| Si | 0.93760160 | 0.00854722 | 0.09103990 |
| Si | 0.62408182 | 0.00985819 | 0.27482040 |
| Si | 0.63152053 | 0.98497423 | 0.89269039 |
| Si | 0.71431855 | 0.01789871 | 0.14327217 |
| Si | 0.71332147 | 0.02417261 | 0.76429867 |
| Si | 0.71173066 | 0.00300897 | 0.50675977 |
| Si | 0.43474618 | 0.24237588 | 0.08082636 |
| Si | 0.12647339 | 0.22655742 | 0.28237360 |
| Si | 0.13070451 | 0.25565908 | 0.89480444 |
| Si | 0.21412923 | 0.22053173 | 0.14419557 |
| Si | 0.21650872 | 0.25316235 | 0.77320925 |
| Si | 0.21392614 | 0.24641234 | 0.51346009 |
| Si | 0.43561244 | 0.74517160 | 0.82225983 |
| Si | 0.06137649 | 0.47858866 | 0.16716610 |
| Si | 0.06527986 | 0.50436224 | 0.91428641 |
| Si | 0.37386620 | 0.49026855 | 0.73908395 |
| Si | 0.37212173 | 0.50036033 | 0.10272287 |
| Si | 0.28313232 | 0.50786708 | 0.86413051 |
| Si | 0.28460354 | 0.49214609 | 0.49908417 |
| Si | 0.56595046 | 0.75267557 | 0.16866004 |
| Si | 0.56566855 | 0.74309842 | 0.91206880 |
| Si | 0.87283917 | 0.76710894 | 0.71748519 |
| Si | 0.86815163 | 0.76618105 | 0.11340606 |
| Si | 0.78682780 | 0.77588246 | 0.85951898 |
| Si | 0.78444534 | 0.76250028 | 0.23643591 |
| Si | 0.77925877 | 0.75067400 | 0.48818580 |
| Si | 0.93519524 | 0.51283242 | 0.81842296 |
| Si | 0.93044711 | 0.51823532 | 0.07305327 |
| Si | 0.62932255 | 0.50114713 | 0.28684462 |
| Si | 0.62783067 | 0.48757966 | 0.89134584 |

|    |            |            |            |
|----|------------|------------|------------|
| Si | 0.71490529 | 0.51783960 | 0.14592578 |
| Si | 0.71531827 | 0.51871301 | 0.77584319 |
| Si | 0.71573125 | 0.49702714 | 0.52079312 |
| Si | 0.43463177 | 0.75632504 | 0.07661355 |
| Si | 0.13064642 | 0.71329478 | 0.28105703 |
| Si | 0.12798005 | 0.75731688 | 0.89533257 |
| Si | 0.21566831 | 0.71793079 | 0.14471503 |
| Si | 0.21329809 | 0.75921770 | 0.77450682 |
| Si | 0.21576104 | 0.74031060 | 0.52062797 |
| Ga | 0.29737296 | 0.45926557 | 0.25124392 |

### HGa(5)-MTW

$$a = 25.7067 \text{ \AA}$$

$$b = 10.2416 \text{ \AA}$$

$$c = 12.2443 \text{ \AA}$$

$$\alpha = 89.6309^\circ$$

$$\beta = 108.894^\circ$$

$$\gamma = 89.2052^\circ$$

|   |            |            |            |
|---|------------|------------|------------|
| H | 0.28540696 | 0.59329955 | 0.04790149 |
| O | 0.09943050 | 0.38610680 | 0.25168372 |
| O | 0.10555424 | 0.10971424 | 0.88056145 |
| O | 0.26086858 | 0.36731782 | 0.85984468 |
| O | 0.58013423 | 0.11664229 | 0.21473469 |
| O | 0.58453074 | 0.39856313 | 0.85977593 |
| O | 0.74408622 | 0.15445397 | 0.79391845 |
| O | 0.92465831 | 0.36001162 | 0.75937923 |
| O | 0.92302070 | 0.13750895 | 0.11677686 |
| O | 0.76851178 | 0.39572347 | 0.18969219 |
| O | 0.41274320 | 0.10532179 | 0.73267948 |
| O | 0.38748916 | 0.33636821 | 0.05039824 |
| O | 0.24702170 | 0.12066295 | 0.14665952 |
| O | 0.89840084 | 0.10911123 | 0.74176414 |
| O | 0.89665784 | 0.38763273 | 0.11124596 |
| O | 0.74233935 | 0.14813411 | 0.13969871 |

|   |            |            |            |
|---|------------|------------|------------|
| O | 0.39667578 | 0.34578207 | 0.79113693 |
| O | 0.41821497 | 0.09835825 | 0.14625885 |
| O | 0.24446570 | 0.37042787 | 0.20947046 |
| O | 0.07604413 | 0.13240251 | 0.25470885 |
| O | 0.07626419 | 0.36064202 | 0.86594122 |
| O | 0.24206258 | 0.11476732 | 0.82098760 |
| O | 0.59364454 | 0.36749235 | 0.26100080 |
| O | 0.59860816 | 0.14441192 | 0.89826511 |
| O | 0.75738981 | 0.40371762 | 0.85436446 |
| O | 0.00066030 | 0.95463008 | 0.15717027 |
| O | 0.07046734 | 0.03807804 | 0.05150799 |
| O | 0.33971598 | 0.96310542 | 0.57893519 |
| O | 0.32860853 | 0.00391627 | 0.78334806 |
| O | 0.34189616 | 0.98877480 | 0.21987124 |
| O | 0.32372036 | 0.02027233 | 0.99645747 |
| O | 0.28606043 | 0.03540454 | 0.36367936 |
| O | 0.49369260 | 0.27545794 | 0.15448339 |
| O | 0.56742980 | 0.29153628 | 0.04378193 |
| O | 0.84703459 | 0.27497530 | 0.57292207 |
| O | 0.82838026 | 0.28747285 | 0.77270112 |
| O | 0.84728422 | 0.21917229 | 0.20801893 |
| O | 0.82478174 | 0.21978059 | 0.98070875 |
| O | 0.79259013 | 0.21405003 | 0.35733763 |
| O | 0.00221589 | 0.03434307 | 0.83585713 |
| O | 0.92980421 | 0.98656763 | 0.94509709 |
| O | 0.65819721 | 0.05029043 | 0.41437788 |
| O | 0.67477800 | 0.01068972 | 0.21605793 |
| O | 0.65498135 | 0.02082790 | 0.78096445 |
| O | 0.67839145 | 0.97414598 | 0.00388954 |
| O | 0.70723876 | 0.97435026 | 0.63216573 |
| O | 0.49842454 | 0.25274344 | 0.83022017 |
| O | 0.43761048 | 0.16484372 | 0.95427180 |
| O | 0.15375715 | 0.23580995 | 0.42974365 |
| O | 0.16953699 | 0.20422098 | 0.22702504 |
| O | 0.15862932 | 0.28013964 | 0.79572013 |

|   |            |            |            |
|---|------------|------------|------------|
| O | 0.17104502 | 0.28537586 | 0.01957193 |
| O | 0.21244820 | 0.28696329 | 0.64612211 |
| O | 0.24871021 | 0.35761372 | 0.47622888 |
| O | 0.74590858 | 0.37334027 | 0.47008938 |
| O | 0.76105732 | 0.12161676 | 0.52866349 |
| O | 0.24782087 | 0.10591627 | 0.53223595 |
| O | 0.10644299 | 0.88614709 | 0.23759352 |
| O | 0.10074099 | 0.61161869 | 0.87078354 |
| O | 0.25804209 | 0.85985220 | 0.84768968 |
| O | 0.58671862 | 0.61965610 | 0.21628987 |
| O | 0.58440352 | 0.89208302 | 0.85665087 |
| O | 0.74596297 | 0.65315893 | 0.78801090 |
| O | 0.92504538 | 0.85834082 | 0.75391369 |
| O | 0.91919128 | 0.63865328 | 0.12103433 |
| O | 0.76137070 | 0.89466847 | 0.18449169 |
| O | 0.41900850 | 0.59377496 | 0.76330734 |
| O | 0.39697542 | 0.84395469 | 0.11649044 |
| O | 0.26030941 | 0.61441105 | 0.15783868 |
| O | 0.89511163 | 0.61042838 | 0.73025577 |
| O | 0.89546514 | 0.88976285 | 0.11066248 |
| O | 0.73903748 | 0.64397494 | 0.14090569 |
| O | 0.40974622 | 0.85035571 | 0.76284743 |
| O | 0.43108742 | 0.59712484 | 0.15472482 |
| O | 0.24769242 | 0.86719938 | 0.19431721 |
| O | 0.07561370 | 0.63897254 | 0.22848160 |
| O | 0.08352541 | 0.86069787 | 0.90405549 |
| O | 0.22926620 | 0.61435757 | 0.80932378 |
| O | 0.60149741 | 0.86853196 | 0.27475145 |
| O | 0.60936541 | 0.64453075 | 0.91666426 |
| O | 0.75381858 | 0.90208319 | 0.85099153 |
| O | 0.99812969 | 0.46409568 | 0.13846759 |
| O | 0.07789629 | 0.50372402 | 0.04703672 |
| O | 0.33998183 | 0.47499635 | 0.60126955 |
| O | 0.32759552 | 0.53458488 | 0.80355040 |
| O | 0.34677109 | 0.45463521 | 0.23757361 |



|    |            |            |            |
|----|------------|------------|------------|
| O  | 0.31010098 | 0.55805574 | 0.00400455 |
| O  | 0.29223361 | 0.53536312 | 0.37807647 |
| O  | 0.50190569 | 0.78534771 | 0.15671861 |
| O  | 0.57986289 | 0.80321926 | 0.05707999 |
| O  | 0.84138698 | 0.78422145 | 0.57161305 |
| O  | 0.83064143 | 0.79390706 | 0.77949923 |
| O  | 0.84310123 | 0.72684188 | 0.20770596 |
| O  | 0.82163146 | 0.72322295 | 0.98186944 |
| O  | 0.78846563 | 0.71725426 | 0.35606605 |
| O  | 0.99859793 | 0.54171993 | 0.84500634 |
| O  | 0.91905827 | 0.50159962 | 0.93707708 |
| O  | 0.65810024 | 0.52894858 | 0.41328653 |
| O  | 0.67629103 | 0.48568809 | 0.21676039 |
| O  | 0.65811151 | 0.51835044 | 0.78584107 |
| O  | 0.68270148 | 0.45624808 | 0.00697099 |
| O  | 0.70826879 | 0.46694868 | 0.63335319 |
| O  | 0.50610576 | 0.73010147 | 0.85958671 |
| O  | 0.42726707 | 0.71877865 | 0.95835608 |
| O  | 0.15154204 | 0.72546785 | 0.41562944 |
| O  | 0.17538305 | 0.69600336 | 0.22176767 |
| O  | 0.15171218 | 0.79305802 | 0.78819106 |
| O  | 0.18135632 | 0.75077067 | 0.01181243 |
| O  | 0.20299057 | 0.78824931 | 0.63314645 |
| O  | 0.24354315 | 0.85785831 | 0.46701819 |
| O  | 0.73939172 | 0.87474300 | 0.46449524 |
| O  | 0.75726044 | 0.62417124 | 0.52721681 |
| O  | 0.24639621 | 0.60826573 | 0.53446295 |
| Si | 0.43668911 | 0.21807754 | 0.82770837 |
| Si | 0.06305522 | 0.00205961 | 0.17541321 |
| Si | 0.06536532 | 0.01070374 | 0.91773016 |
| Si | 0.37289902 | 0.98016540 | 0.71571535 |
| Si | 0.37110106 | 0.98780017 | 0.11972370 |
| Si | 0.28883638 | 0.00010469 | 0.86222259 |
| Si | 0.28092464 | 0.00250085 | 0.23106938 |
| Si | 0.27924814 | 0.99084149 | 0.48548217 |

|    |            |            |            |
|----|------------|------------|------------|
| Si | 0.55852578 | 0.26291127 | 0.16787140 |
| Si | 0.56222190 | 0.27076283 | 0.90879259 |
| Si | 0.87476986 | 0.25711889 | 0.71200189 |
| Si | 0.87281104 | 0.24107547 | 0.10395279 |
| Si | 0.78869331 | 0.26541597 | 0.85066754 |
| Si | 0.78745620 | 0.24449624 | 0.22410239 |
| Si | 0.78617899 | 0.24681918 | 0.48165319 |
| Si | 0.93891832 | 0.99740661 | 0.81996461 |
| Si | 0.93706986 | 0.99145124 | 0.08196601 |
| Si | 0.62835921 | 0.01225941 | 0.27948313 |
| Si | 0.62881821 | 0.00901148 | 0.88500862 |
| Si | 0.71387689 | 0.00642874 | 0.13604008 |
| Si | 0.71529384 | 0.01329883 | 0.76484044 |
| Si | 0.71654124 | 0.00557098 | 0.51003464 |
| Si | 0.43354520 | 0.22123529 | 0.07691993 |
| Si | 0.12444265 | 0.24058046 | 0.29032539 |
| Si | 0.12798991 | 0.25833402 | 0.89126219 |
| Si | 0.20818046 | 0.24621862 | 0.15075238 |
| Si | 0.21867609 | 0.26089103 | 0.78043857 |
| Si | 0.21580329 | 0.24589090 | 0.52099611 |
| Si | 0.44069921 | 0.72464121 | 0.83791002 |
| Si | 0.06242657 | 0.49773529 | 0.16587274 |
| Si | 0.06304056 | 0.50461409 | 0.90710349 |
| Si | 0.37122109 | 0.48631600 | 0.73945400 |
| Si | 0.28140013 | 0.51637319 | 0.86472639 |
| Si | 0.28767709 | 0.48917483 | 0.24841317 |
| Si | 0.28193178 | 0.49409520 | 0.49756702 |
| Si | 0.56698399 | 0.76832793 | 0.17617472 |
| Si | 0.56975917 | 0.76658987 | 0.92245590 |
| Si | 0.87296147 | 0.76102330 | 0.70889037 |
| Si | 0.86968372 | 0.74504141 | 0.10496696 |
| Si | 0.78791934 | 0.76729206 | 0.84996959 |
| Si | 0.78263175 | 0.74601614 | 0.22220091 |
| Si | 0.78131994 | 0.75056850 | 0.47958884 |
| Si | 0.93453546 | 0.50353560 | 0.81814901 |

|    |            |            |            |
|----|------------|------------|------------|
| Si | 0.93322817 | 0.49765309 | 0.07670900 |
| Si | 0.62858682 | 0.50095688 | 0.27639944 |
| Si | 0.63328161 | 0.50488504 | 0.89187282 |
| Si | 0.71640832 | 0.49579937 | 0.13884884 |
| Si | 0.71759676 | 0.51099343 | 0.76555035 |
| Si | 0.71750339 | 0.49843822 | 0.51090511 |
| Si | 0.43939288 | 0.73384243 | 0.09757312 |
| Si | 0.12692303 | 0.73738590 | 0.27558765 |
| Si | 0.12881393 | 0.75418875 | 0.89354362 |
| Si | 0.21543399 | 0.73452919 | 0.14789040 |
| Si | 0.21064610 | 0.76531189 | 0.76847707 |
| Si | 0.21154236 | 0.74495510 | 0.51278207 |
| Ga | 0.37785584 | 0.47917694 | 0.12622971 |

### HGa(6)-MTW

a = 25.4436 Å

b = 10.2053 Å

c = 12.2978 Å

$\alpha$  = 90.9256°

$\beta$  = 108.606°

$\gamma$  = 89.1464°

|   |            |            |            |
|---|------------|------------|------------|
| H | 0.46096309 | 0.01067966 | 0.16958606 |
| O | 0.10638542 | 0.41813832 | 0.26284027 |
| O | 0.10078494 | 0.10446304 | 0.87107118 |
| O | 0.26138871 | 0.34735250 | 0.85469855 |
| O | 0.61945631 | 0.18729327 | 0.24516123 |
| O | 0.59758443 | 0.35964749 | 0.85434160 |
| O | 0.76343790 | 0.09446889 | 0.83463890 |
| O | 0.92519294 | 0.34558008 | 0.76899214 |
| O | 0.91535404 | 0.16557734 | 0.11696022 |
| O | 0.75598730 | 0.40548586 | 0.20727507 |
| O | 0.42419130 | 0.07310518 | 0.76474075 |
| O | 0.39430815 | 0.33738158 | 0.14034095 |
| O | 0.24029352 | 0.08480594 | 0.14728068 |

|   |            |            |            |
|---|------------|------------|------------|
| O | 0.89585584 | 0.09556228 | 0.73355725 |
| O | 0.89600307 | 0.41733492 | 0.13250462 |
| O | 0.73862949 | 0.15394581 | 0.15123682 |
| O | 0.39796833 | 0.32259559 | 0.71981746 |
| O | 0.42540910 | 0.05778490 | 0.13219147 |
| O | 0.26643058 | 0.33713940 | 0.17816884 |
| O | 0.07991093 | 0.16890053 | 0.22254372 |
| O | 0.07833768 | 0.35446435 | 0.88804809 |
| O | 0.23329225 | 0.10003523 | 0.81800983 |
| O | 0.57873746 | 0.42986176 | 0.23439471 |
| O | 0.59302661 | 0.11126625 | 0.91358164 |
| O | 0.73379414 | 0.34536811 | 0.81436948 |
| O | 0.99913170 | 0.99927563 | 0.14137386 |
| O | 0.08210082 | 0.00476247 | 0.05308150 |
| O | 0.34360856 | 0.98625378 | 0.58066950 |
| O | 0.32439828 | 0.01604927 | 0.77738777 |
| O | 0.34377094 | 0.99043607 | 0.21405324 |
| O | 0.32322460 | 0.03678918 | 0.99169784 |
| O | 0.28808229 | 0.00925416 | 0.36226026 |
| O | 0.51125423 | 0.22540197 | 0.16557040 |
| O | 0.57568279 | 0.30567092 | 0.04389966 |
| O | 0.84230613 | 0.27520234 | 0.58410124 |
| O | 0.82957736 | 0.27122951 | 0.78962988 |
| O | 0.84185571 | 0.24889598 | 0.21853348 |
| O | 0.81659575 | 0.26535347 | 0.99460419 |
| O | 0.78733058 | 0.22319613 | 0.36771667 |
| O | 0.99884363 | 0.03212735 | 0.85789823 |
| O | 0.91597011 | 0.00597789 | 0.94425777 |
| O | 0.65653026 | 0.01776399 | 0.41601653 |
| O | 0.67896680 | 0.97864688 | 0.22266309 |
| O | 0.65709507 | 0.02567057 | 0.79114847 |
| O | 0.68402149 | 0.96859439 | 0.01090089 |
| O | 0.70695226 | 0.97988335 | 0.63563929 |
| O | 0.50112589 | 0.25326924 | 0.83897163 |
| O | 0.41866723 | 0.23913721 | 0.93202399 |

|   |            |            |            |
|---|------------|------------|------------|
| O | 0.15445366 | 0.24348562 | 0.42142006 |
| O | 0.18058654 | 0.24787076 | 0.23121112 |
| O | 0.15405135 | 0.27917551 | 0.78916038 |
| O | 0.17622981 | 0.26153037 | 0.01286355 |
| O | 0.20966060 | 0.26583817 | 0.64138306 |
| O | 0.25857749 | 0.33159906 | 0.48866351 |
| O | 0.75120910 | 0.41342554 | 0.47587748 |
| O | 0.74282261 | 0.16611819 | 0.53040266 |
| O | 0.23966867 | 0.08244367 | 0.51650375 |
| O | 0.09995866 | 0.91668328 | 0.26347286 |
| O | 0.10245865 | 0.60257557 | 0.87301943 |
| O | 0.26429450 | 0.85198322 | 0.85645562 |
| O | 0.58830382 | 0.68801272 | 0.25267315 |
| O | 0.59586800 | 0.85998660 | 0.86274063 |
| O | 0.76544150 | 0.59269119 | 0.83655999 |
| O | 0.92435138 | 0.84607330 | 0.77625745 |
| O | 0.92487406 | 0.66251886 | 0.11281402 |
| O | 0.77188175 | 0.90598480 | 0.18816993 |
| O | 0.42242539 | 0.57488226 | 0.75514697 |
| O | 0.38155560 | 0.82224060 | 0.08576251 |
| O | 0.23232105 | 0.58348702 | 0.14105683 |
| O | 0.89512927 | 0.59554626 | 0.74324980 |
| O | 0.90047700 | 0.91211087 | 0.13212296 |
| O | 0.74615754 | 0.65496759 | 0.14706586 |
| O | 0.39184169 | 0.82521001 | 0.75159539 |
| O | 0.42606595 | 0.58676713 | 0.13997556 |
| O | 0.26024341 | 0.83208173 | 0.19044899 |
| O | 0.07344751 | 0.66510072 | 0.23734870 |
| O | 0.07699977 | 0.85430446 | 0.86959082 |
| O | 0.24291960 | 0.60044709 | 0.82358433 |
| O | 0.57619348 | 0.94681702 | 0.22602933 |
| O | 0.58942690 | 0.60934414 | 0.90856326 |
| O | 0.73582830 | 0.84453817 | 0.82923063 |
| O | 0.00080996 | 0.47487859 | 0.15111544 |
| O | 0.07926825 | 0.52527260 | 0.05659839 |

|    |            |            |            |
|----|------------|------------|------------|
| O  | 0.34116604 | 0.49902710 | 0.57114532 |
| O  | 0.32743850 | 0.49019528 | 0.77441610 |
| O  | 0.34094361 | 0.52625097 | 0.21254741 |
| O  | 0.33063444 | 0.51546424 | 0.99182814 |
| O  | 0.28209213 | 0.50719644 | 0.35359122 |
| O  | 0.48971446 | 0.79946005 | 0.15040241 |
| O  | 0.56729463 | 0.79076848 | 0.04483700 |
| O  | 0.84773020 | 0.76809541 | 0.58237863 |
| O  | 0.82492970 | 0.77579758 | 0.77786301 |
| O  | 0.85178157 | 0.73095438 | 0.21849640 |
| O  | 0.82484060 | 0.75606051 | 0.99333399 |
| O  | 0.79286990 | 0.73668767 | 0.36232850 |
| O  | 0.99944048 | 0.53320060 | 0.85418677 |
| O  | 0.92086880 | 0.48631386 | 0.94875269 |
| O  | 0.65355835 | 0.53860874 | 0.41419857 |
| O  | 0.66735678 | 0.54563633 | 0.20945109 |
| O  | 0.65820052 | 0.53381304 | 0.79243965 |
| O  | 0.68208838 | 0.47602156 | 0.01176494 |
| O  | 0.70565500 | 0.49905780 | 0.63186380 |
| O  | 0.49833586 | 0.75659216 | 0.83303954 |
| O  | 0.42969178 | 0.69941238 | 0.94899698 |
| O  | 0.15199892 | 0.75201859 | 0.42723431 |
| O  | 0.17157829 | 0.73956013 | 0.22941310 |
| O  | 0.15922363 | 0.76951037 | 0.79324428 |
| O  | 0.17184524 | 0.77249809 | 0.01515650 |
| O  | 0.21398411 | 0.76469030 | 0.64511957 |
| O  | 0.25728166 | 0.83109147 | 0.48429220 |
| O  | 0.75927667 | 0.91806225 | 0.48404476 |
| O  | 0.74650414 | 0.66727056 | 0.51877693 |
| O  | 0.23530835 | 0.58219663 | 0.50870925 |
| Si | 0.43596031 | 0.22268108 | 0.81725076 |
| Si | 0.06492552 | 0.02205084 | 0.16959354 |
| Si | 0.06449048 | 0.99914562 | 0.91314707 |
| Si | 0.37169912 | 0.97551020 | 0.71911694 |
| Si | 0.36599088 | 0.97280933 | 0.10536968 |

|    |            |            |            |
|----|------------|------------|------------|
| Si | 0.28613148 | 0.00111817 | 0.85931182 |
| Si | 0.28235259 | 0.97913197 | 0.22971819 |
| Si | 0.28200288 | 0.97762682 | 0.48646231 |
| Si | 0.56998249 | 0.28629783 | 0.17138507 |
| Si | 0.56637479 | 0.25690742 | 0.91241752 |
| Si | 0.87312386 | 0.24628931 | 0.71912528 |
| Si | 0.86739975 | 0.27343400 | 0.11494057 |
| Si | 0.78596305 | 0.24379500 | 0.85819261 |
| Si | 0.78095494 | 0.25837217 | 0.23579780 |
| Si | 0.78071357 | 0.26975980 | 0.48944864 |
| Si | 0.93401144 | 0.99472197 | 0.82836316 |
| Si | 0.93287484 | 0.02072396 | 0.08355506 |
| Si | 0.63243937 | 0.03385478 | 0.27739400 |
| Si | 0.63223195 | 0.99289978 | 0.89443478 |
| Si | 0.71826579 | 0.00271834 | 0.14325896 |
| Si | 0.71610926 | 0.98748833 | 0.77214378 |
| Si | 0.71659378 | 0.01972176 | 0.51674916 |
| Si | 0.13011986 | 0.26897911 | 0.28407126 |
| Si | 0.12738054 | 0.24988559 | 0.89031829 |
| Si | 0.21566091 | 0.23343670 | 0.14213596 |
| Si | 0.21464988 | 0.24908623 | 0.77490491 |
| Si | 0.21577295 | 0.23111418 | 0.51716469 |
| Si | 0.43558427 | 0.71490880 | 0.82176453 |
| Si | 0.06457469 | 0.52050681 | 0.17636960 |
| Si | 0.06480451 | 0.50399034 | 0.91838340 |
| Si | 0.37237199 | 0.47027123 | 0.70635635 |
| Si | 0.37320178 | 0.48719838 | 0.12077451 |
| Si | 0.29130282 | 0.48834068 | 0.86173512 |
| Si | 0.28080831 | 0.48802713 | 0.22209331 |
| Si | 0.27921664 | 0.48022083 | 0.48045374 |
| Si | 0.55639077 | 0.80385109 | 0.16773543 |
| Si | 0.56298761 | 0.75390749 | 0.91252604 |
| Si | 0.87322189 | 0.74590824 | 0.72002204 |
| Si | 0.87544371 | 0.76509513 | 0.11368853 |
| Si | 0.78792246 | 0.74200991 | 0.85974836 |

|    |            |            |            |
|----|------------|------------|------------|
| Si | 0.79038467 | 0.75672857 | 0.23029803 |
| Si | 0.78636574 | 0.77242279 | 0.48625867 |
| Si | 0.93548901 | 0.49033207 | 0.82918023 |
| Si | 0.93575756 | 0.50955244 | 0.08657090 |
| Si | 0.62211530 | 0.54928140 | 0.27715516 |
| Si | 0.63157650 | 0.49563568 | 0.89188646 |
| Si | 0.71263147 | 0.51967917 | 0.14396842 |
| Si | 0.71583113 | 0.49350932 | 0.76838532 |
| Si | 0.71447717 | 0.52902894 | 0.51030146 |
| Si | 0.43207890 | 0.72403939 | 0.08063882 |
| Si | 0.12400165 | 0.76812899 | 0.28913965 |
| Si | 0.12776737 | 0.74942955 | 0.88770565 |
| Si | 0.20849840 | 0.73182984 | 0.14379693 |
| Si | 0.22011286 | 0.74563382 | 0.77906462 |
| Si | 0.21467366 | 0.73255868 | 0.51637908 |
| Ga | 0.43893350 | 0.23867136 | 0.08552460 |

### HGa(7)-MTW

$$a = 25.3095 \text{ \AA}$$

$$b = 10.2474 \text{ \AA}$$

$$c = 12.4189 \text{ \AA}$$

$$\alpha = 89.8156^\circ$$

$$\beta = 108.965^\circ$$

$$\gamma = 90.0673^\circ$$

|   |            |            |            |
|---|------------|------------|------------|
| H | 0.13529159 | 0.36307050 | 0.12418861 |
| O | 0.07017077 | 0.37084634 | 0.24048161 |
| O | 0.10528589 | 0.11182927 | 0.86966275 |
| O | 0.26165913 | 0.34854786 | 0.82125225 |
| O | 0.57585396 | 0.10235856 | 0.22798473 |
| O | 0.60328940 | 0.35742266 | 0.88121606 |
| O | 0.76367929 | 0.09464385 | 0.84686926 |
| O | 0.91925066 | 0.35419468 | 0.77021540 |
| O | 0.90017665 | 0.10551220 | 0.12541328 |
| O | 0.73831427 | 0.34684937 | 0.14801290 |



|   |            |            |            |
|---|------------|------------|------------|
| O | 0.42082666 | 0.11093389 | 0.77031960 |
| O | 0.39675273 | 0.35307877 | 0.12681532 |
| O | 0.22940468 | 0.06361613 | 0.16754246 |
| O | 0.89526174 | 0.10369624 | 0.73708774 |
| O | 0.92366477 | 0.35746544 | 0.12257299 |
| O | 0.76660296 | 0.09676548 | 0.18214444 |
| O | 0.39727259 | 0.36283599 | 0.74568221 |
| O | 0.42197605 | 0.10274825 | 0.12558971 |
| O | 0.27610471 | 0.33486449 | 0.21657034 |
| O | 0.09997135 | 0.11915774 | 0.26481185 |
| O | 0.08127241 | 0.35964895 | 0.86876377 |
| O | 0.23432271 | 0.09891899 | 0.81848059 |
| O | 0.60312164 | 0.35129593 | 0.26579886 |
| O | 0.57939598 | 0.10637483 | 0.88028251 |
| O | 0.73407146 | 0.34634479 | 0.82809107 |
| O | 0.00131733 | 0.02015639 | 0.14735947 |
| O | 0.08123814 | 0.04104776 | 0.05281368 |
| O | 0.34391788 | 0.03195264 | 0.57825683 |
| O | 0.32266673 | 0.01985889 | 0.77116681 |
| O | 0.34063750 | 0.02841086 | 0.20591032 |
| O | 0.32457369 | 0.02003921 | 0.98576556 |
| O | 0.29737081 | 0.96594752 | 0.36461363 |
| O | 0.49947535 | 0.28362499 | 0.14386037 |
| O | 0.58274198 | 0.25500192 | 0.05871019 |
| O | 0.84331690 | 0.27444430 | 0.57708239 |
| O | 0.81984029 | 0.26979605 | 0.76845805 |
| O | 0.84569731 | 0.27531818 | 0.20957965 |
| O | 0.82666582 | 0.26845645 | 0.98690652 |
| O | 0.79157776 | 0.26177750 | 0.35769935 |
| O | 0.00095592 | 0.04199793 | 0.85130647 |
| O | 0.92117328 | 0.00859450 | 0.94559954 |
| O | 0.65435978 | 0.02600766 | 0.41871377 |
| O | 0.67494238 | 0.02286704 | 0.22391115 |
| O | 0.65603573 | 0.02856995 | 0.78820551 |
| O | 0.67885514 | 0.02201545 | 0.01195319 |

|   |            |            |            |
|---|------------|------------|------------|
| O | 0.70922923 | 0.01315172 | 0.63738856 |
| O | 0.50023590 | 0.28269381 | 0.86157289 |
| O | 0.41712351 | 0.25334230 | 0.94752613 |
| O | 0.16311736 | 0.29434292 | 0.40591378 |
| O | 0.15604849 | 0.29794525 | 0.18454440 |
| O | 0.15364480 | 0.27620912 | 0.76554654 |
| O | 0.18478933 | 0.28345050 | 0.98934983 |
| O | 0.20978943 | 0.23379267 | 0.62354702 |
| O | 0.26849994 | 0.36086525 | 0.51270365 |
| O | 0.73654494 | 0.35188358 | 0.49049280 |
| O | 0.76171838 | 0.10139387 | 0.49758771 |
| O | 0.24018402 | 0.11236498 | 0.46350974 |
| O | 0.08930400 | 0.86801563 | 0.21976377 |
| O | 0.09823192 | 0.61372431 | 0.88361521 |
| O | 0.26245456 | 0.84720296 | 0.84296074 |
| O | 0.57957061 | 0.60144323 | 0.22602875 |
| O | 0.60549220 | 0.85603526 | 0.87920124 |
| O | 0.76297214 | 0.59580479 | 0.83887804 |
| O | 0.92463686 | 0.85677525 | 0.77280476 |
| O | 0.89263168 | 0.60425462 | 0.12139695 |
| O | 0.73632005 | 0.84674747 | 0.16211842 |
| O | 0.42555371 | 0.61112857 | 0.78291039 |
| O | 0.39664498 | 0.85374456 | 0.12828635 |
| O | 0.23756859 | 0.57691124 | 0.15566098 |
| O | 0.89920753 | 0.60705885 | 0.73584918 |
| O | 0.91848892 | 0.85259583 | 0.11606846 |
| O | 0.76635533 | 0.59758590 | 0.18099767 |
| O | 0.39826615 | 0.85949029 | 0.73432825 |
| O | 0.41701170 | 0.60294277 | 0.10645398 |
| O | 0.27271626 | 0.82584220 | 0.17603726 |
| O | 0.10001760 | 0.61723014 | 0.24996279 |
| O | 0.08044063 | 0.86478950 | 0.89371528 |
| O | 0.23242651 | 0.59798628 | 0.82367968 |
| O | 0.60217784 | 0.85262990 | 0.26211275 |
| O | 0.57694458 | 0.60786312 | 0.87680087 |

|    |            |            |            |
|----|------------|------------|------------|
| O  | 0.73341803 | 0.84623086 | 0.81232503 |
| O  | 0.99589351 | 0.54800702 | 0.12712307 |
| O  | 0.08327786 | 0.48156507 | 0.05899395 |
| O  | 0.34658985 | 0.54052068 | 0.59109678 |
| O  | 0.32634073 | 0.53553228 | 0.78666409 |
| O  | 0.34689028 | 0.52865902 | 0.21630967 |
| O  | 0.31694487 | 0.50317562 | 0.99215444 |
| O  | 0.29581239 | 0.52668434 | 0.37085142 |
| O  | 0.49917367 | 0.77460211 | 0.14425130 |
| O  | 0.58236089 | 0.75705478 | 0.05607966 |
| O  | 0.84272493 | 0.78158352 | 0.58512172 |
| O  | 0.82856688 | 0.77103805 | 0.78708394 |
| O  | 0.84404834 | 0.77897438 | 0.21574568 |
| O  | 0.81695344 | 0.77023108 | 0.99191464 |
| O  | 0.79131753 | 0.74825772 | 0.36632242 |
| O  | 0.99885617 | 0.52202497 | 0.86796798 |
| O  | 0.91074508 | 0.50714748 | 0.93862734 |
| O  | 0.65588423 | 0.52759593 | 0.42059868 |
| O  | 0.67908425 | 0.51113374 | 0.23006344 |
| O  | 0.65563496 | 0.52783819 | 0.79169474 |
| O  | 0.67548000 | 0.52773479 | 0.01403041 |
| O  | 0.70576442 | 0.49232812 | 0.63921940 |
| O  | 0.50144774 | 0.79393541 | 0.85937647 |
| O  | 0.41770449 | 0.77487214 | 0.94471192 |
| O  | 0.15495553 | 0.77529189 | 0.42036341 |
| O  | 0.18760616 | 0.75701319 | 0.24192624 |
| O  | 0.15528644 | 0.78038330 | 0.80014586 |
| O  | 0.17623034 | 0.76162319 | 0.02274919 |
| O  | 0.20131047 | 0.75370842 | 0.64073964 |
| O  | 0.25963791 | 0.86332435 | 0.52268854 |
| O  | 0.73554342 | 0.85215020 | 0.49350545 |
| O  | 0.76279555 | 0.60268716 | 0.51739748 |
| O  | 0.23857538 | 0.60804552 | 0.50364854 |
| Si | 0.43405791 | 0.25262941 | 0.83169830 |
| Si | 0.06781834 | 0.01094129 | 0.16997944 |

|    |            |            |            |
|----|------------|------------|------------|
| Si | 0.06711591 | 0.01532789 | 0.91632213 |
| Si | 0.37167583 | 0.00547767 | 0.71409579 |
| Si | 0.37082430 | 0.00060867 | 0.11122906 |
| Si | 0.28622108 | 0.99591739 | 0.85526654 |
| Si | 0.28413369 | 0.97455271 | 0.22781762 |
| Si | 0.28502931 | 0.99319877 | 0.48152342 |
| Si | 0.56496973 | 0.24848574 | 0.17368455 |
| Si | 0.56602488 | 0.25021842 | 0.92032798 |
| Si | 0.86951917 | 0.25009203 | 0.71356130 |
| Si | 0.87391859 | 0.25126496 | 0.11094230 |
| Si | 0.78613405 | 0.24431027 | 0.85793554 |
| Si | 0.78524625 | 0.24517241 | 0.22471987 |
| Si | 0.78290109 | 0.24750553 | 0.48031516 |
| Si | 0.93603760 | 0.00269444 | 0.82726986 |
| Si | 0.93531965 | 0.99664029 | 0.08298471 |
| Si | 0.62664651 | 0.00025500 | 0.28258296 |
| Si | 0.62974446 | 0.00375272 | 0.89014093 |
| Si | 0.71379210 | 0.99646337 | 0.14471407 |
| Si | 0.71558574 | 0.99553661 | 0.77050758 |
| Si | 0.71546250 | 0.99865980 | 0.51254034 |
| Si | 0.43382816 | 0.24809571 | 0.08596042 |
| Si | 0.12190654 | 0.26785632 | 0.27894012 |
| Si | 0.13234782 | 0.25763879 | 0.87599007 |
| Si | 0.21510512 | 0.24035208 | 0.75723955 |
| Si | 0.22143389 | 0.25017628 | 0.50379335 |
| Si | 0.43576327 | 0.75987137 | 0.83068547 |
| Si | 0.06104146 | 0.50828904 | 0.16910887 |
| Si | 0.06525490 | 0.49456791 | 0.91763244 |
| Si | 0.37393228 | 0.51151761 | 0.72674769 |
| Si | 0.36935820 | 0.49798376 | 0.11040930 |
| Si | 0.28445064 | 0.49546338 | 0.85663977 |
| Si | 0.28891553 | 0.48817483 | 0.23978803 |
| Si | 0.28714785 | 0.50933500 | 0.49314758 |
| Si | 0.56521409 | 0.74676334 | 0.17153503 |
| Si | 0.56634909 | 0.75335587 | 0.91787417 |

|    |            |            |            |
|----|------------|------------|------------|
| Si | 0.87363650 | 0.75414470 | 0.72016570 |
| Si | 0.86799846 | 0.75216659 | 0.11092282 |
| Si | 0.78552936 | 0.74508440 | 0.85737271 |
| Si | 0.78415134 | 0.74346123 | 0.23211826 |
| Si | 0.78278240 | 0.74638784 | 0.48976300 |
| Si | 0.93203635 | 0.49771739 | 0.82788161 |
| Si | 0.93042435 | 0.50386562 | 0.07746032 |
| Si | 0.62905942 | 0.49781775 | 0.28492381 |
| Si | 0.62766473 | 0.50489212 | 0.89115740 |
| Si | 0.71440839 | 0.49499592 | 0.14281124 |
| Si | 0.71474123 | 0.49093332 | 0.77404185 |
| Si | 0.71559374 | 0.49436229 | 0.51727616 |
| Si | 0.43273298 | 0.75113138 | 0.08156946 |
| Si | 0.13320568 | 0.75528448 | 0.28313499 |
| Si | 0.12793642 | 0.75596068 | 0.90008407 |
| Si | 0.21894846 | 0.72937857 | 0.14832196 |
| Si | 0.21336200 | 0.74505175 | 0.77672825 |
| Si | 0.21442260 | 0.75046485 | 0.52185137 |
| Ga | 0.21958383 | 0.23402980 | 0.13434923 |
